# Supplementary material for: Biological, clinical and population relevance of 95 loci for blood lipids
Source: Springer Nature journal article supplement (doi:10.1038/nature09270), 2010-08-01
Supplement: 41586_2010_BFnature09270_MOESM283_ESM.pdf [file 41586_2010_BFnature09270_MOESM283_ESM.pdf]

## Methods

**Study samples and phenotypes.** Each of the 46 participating studies in the primary meta-analysis is described in **Supplementary Table 1** and in further detail below. In most studies, total cholesterol, HDL-C, and triglycerides were measured at fasting in subjects. Direct measurements of LDL-C were available for individuals in the Baltimore Longitudinal Study of Aging and Women's Genome Health Study and for a subset of individuals in the Health2000 GenMets Study; otherwise, LDL-C was calculated using the Friedewald formula, with missing values assigned to individuals with triglycerides >400 mg/dL. Individuals known to be on lipid-lowering therapy were excluded from analysis for all studies except the Fenland, EPIC Norfolk, and EPIC Norfolk Obese cohorts; fewer than 2% of individuals in each of these studies were known to be on lipid-lowering medication, and no exclusions or adjustments were made. All individuals in each of these 46 studies were reported to be of European descent. All participants provided informed consent, and local ethical committees at participating institutions approved individual study protocols.

## Study descriptions.

### I. Primary Analysis: Community-based cohorts

- a. **Age, Gene/Environment Susceptibility (AGES) Study.** The AGES study has been described previously<sup>21</sup>. The study was initiated in 2002 to examine genetic susceptibility and gene/environment interactions related to disease and disability in old age. The AGES study is comprised of approximately 2,500 samples drawn from the Reykjavik Study, a population-based cohort comprised of individuals born between 1907 and 1935 and followed since 1967 by the Icelandic Heart Association.

- b. Atherosclerosis Risk in Communities (ARIC) Study.** The ARIC study has been described in detail previously<sup>22</sup>. The ARIC Study is a multi-center prospective investigation of atherosclerotic disease. White and African American men and women aged 45-64 years at baseline were recruited from four communities: Forsyth County, North Carolina; Jackson, Mississippi; suburban areas of Minneapolis, Minnesota; and Washington County, Maryland. A total of 15,792 individuals participated in the baseline examination in 1987-1989, with three triennial follow-up examinations. 7,841 white subjects were included in this analysis. Individuals known to be taking lipid-lowering medications and/or to have type 2 diabetes were excluded. Prevalent type 2 diabetes was defined as the presence of any of the following: a fasting blood glucose level of  $\geq 126$  mg/dL (7.0 mmol/L); a nonfasting blood glucose level of  $\geq 200$  mg/dL (11.1 mmol/L); self-reported physician diagnosis of type 2 diabetes; or pharmacologic treatment of diabetes in the past two weeks.
- c. Australian, Danish, Dutch, Finnish, Swedish Twin Cohorts and TwinsUK.** Twin samples were drawn from the GenomEUtwin project<sup>23</sup>, which is comprised of the Danish, Dutch, Finnish, Italian, Norwegian, and Swedish national twin cohorts, an Australian twin cohort, and the UK-based TwinsUK cohort. The current study included monozygotic twin pairs from the Australian (MZGWA-AUS; 449 pairs), Danish (MZGWA-DK; 142 pairs), Dutch (MZGWA-NLD; 289 pairs), Finnish (MZGWA-FIN; 137 pairs), Swedish (MZGWA-SWE; 297 pairs), and UK (MZGWA-UK; 457 pairs) cohorts. In each of the six twin cohorts, female monozygotic twin pairs were identified, lipid measurements were averaged for each pair, and genotype data for one of the individuals was used in the analysis.
- d. Baltimore Longitudinal Study of Aging (BLSA).** This study has been described in detail previously<sup>24</sup>. The BLSA is an on-going prospective study that began in

1958 to investigate changes that occur with normal aging. The study consists of volunteers recruited primarily from the Washington, DC, and Baltimore, MD, areas. Genome-wide data were available for 1,230 participants. The analysis was restricted to 713 Caucasian individuals with lipid measurements.

- e. **British 1958 Birth Cohort – Wellcome Trust Case Control Consortium (B58C-WTCCC).** This study was part of the Wellcome Trust Case Control Consortium (WTCCC) and has been described previously<sup>25, 26</sup>. The British 1958 Birth Cohort is a national population sample followed periodically from birth to age 44-45 years. The current analysis included 1,459 individuals that passed quality control criteria and had lipid measurements available.
- f. **Cardiovascular Health Study (CHS).** The CHS has been described in detail previously<sup>27</sup>. The CHS is a population-based cohort study of risk factors for coronary heart disease and stroke in adults  $\geq 65$  years conducted across four field centers. The original predominantly Caucasian cohort of 5,201 persons was recruited in 1989-1990 from random samples of the Medicare eligibility lists, and an additional 687 African-Americans were enrolled subsequently for a total sample of 5,888. DNA was extracted from blood samples drawn on all participants at their baseline examination in 1989-90. In 2007-2008, genotyping was performed at the General Clinical Research Center's Phenotyping/Genotyping Laboratory at Cedars-Sinai on 3,980 CHS participants who were free of cardiovascular disease at baseline, consented to genetic testing, and had DNA available for genotyping. To limit the possibility of confounding due to population structure, these analyses were limited to the 3,121 white participants with genotype data and lipid measurements.

- g. The Cohorte Lausannoise (CoLaus) Study.** The CoLaus study has been described in detail previously<sup>28</sup>. Participants were randomly selected from a list of 56,694 individuals aged 35 to 75 years who were permanent residents of the City of Lausanne, Switzerland. Only individuals with four grandparents of European origin were included in the study. The CoLaus study was sponsored in part by GlaxoSmithKline, and all participants were duly informed about this sponsorship. Principal components were computed to adjust for population stratification using EIGENSOFT (<http://genepath.med.harvard.edu/~reich/Software.htm>). After using the Akaike Information Criterion (AIC) based stepwise model selection, the 3 principal components significant at  $P < 0.05$  were included as covariates in the association analyses. A total of 5,253 participants with lipids measurements were included in this analysis.
- h. KORA - Cooperative Health Research in the Region of Augsburg (KORA).** The KORA surveys have been described in detail previously<sup>29, 30</sup>. The third KORA survey (KORA S3, n=3,996) is a population-based sample from the general population of the South-German city of Augsburg and surrounding counties from 1994/1995. A subsample of 1,644 individuals from this survey with 10-year followup (KORA F3) information available was successfully genotyped (the KORA S3/F3 500K Study). All participants had a German passport and were of European origin. A total of 1,405 participants not on lipid-lowering therapy and with lipid measurements were included in this analysis.
- i. The European Prospective Investigation of Cancer-Norfolk Subcohort (EPIC-N-SUBCOH).** The EPIC-Norfolk studies have been described previously<sup>31, 32</sup>. EPIC-Norfolk is an ongoing prospective cohort study of chronic diseases comprising 25,663 Norfolk residents, an ethnically homogenous European origin population aged 39-79 who were recruited from general practice

registers between 1993 and 1997 for a first health examination. A total of 2,346 non-obese subjects were included in this analysis.

- j. Fenland Study.** The Fenland Study is a community-based cohort of individuals born between 1950 and 1975 and residing in East Cambridgeshire or Fenland, UK. The goal of the Fenland Study is to study the interactions between diet, lifestyle, and genetic factors and risk of diabetes and obesity. A total of 1,401 individuals with genotype data and lipid measurements were included in the current analysis.
- k. Invecchiare in Chianti (InCHIANTI) Study.** InCHIANTI, described in detail previously<sup>33</sup>, is an epidemiological study of risk factors contributing to the decline in physical functioning in late life. Individuals were selected from the population registries of two small towns in Tuscany, Italy. Participants, all of white European origin, were invited to a clinic visit for evaluation of health status as described in detail previously<sup>34</sup>. Genotype data and lipid measurements were available for 1,134 individuals.
- l. London Life Sciences Prospective Population Study (LOLIPOP).** LOLIPOP is an ongoing community cohort of approximately 30,000 individuals aged 35-75 years, recruited in West London, UK<sup>35</sup> to study the environmental and genetic factors that contribute to cardiovascular disease among UK Indian Asians. The study includes both European and Indian Asian subjects. Indian Asian participants reported having all four grandparents born on the Indian subcontinent, while European participants are self-classified whites born in Europe. For the current study, genotypes and lipid measurements were available for 1,599 European white individuals included in the primary meta-analysis.

- m. National FINRISK Study.** The FINRISK study is a population survey of risk factors for chronic, non-communicable diseases carried out in Finland. Since 1972, the survey has been performed every five years using independent, random and representative population samples from different parts of the country<sup>36</sup>. Participants complete a questionnaire and undergo a physical examination, including measurement of anthropometric traits and blood draw. The current analysis included 910 healthy individuals from the Helsinki area, who participated in a FINRISK survey and had genotype data and lipid measurements available.
- n. Northern Finland Birth Cohort 1966 (NFBC1966).** The NFBC1966 has been described in detail previously<sup>37</sup>. The study was originally designed to study factors affecting pre-term birth, low birth weight, and subsequent morbidity and mortality. Mothers living in the two northern-most provinces of Finland were invited to participate if they had expected delivery dates during 1966. A total of 12,058 live-births were included in the study. At age 31, 5,923 individuals still living in the Helsinki area or Northern Finland were asked to participate in a detailed biological and medical examination as well as a questionnaire. Genotypes and lipid measurements were available for 5,138 individuals included in this analysis.
- o. Pharmacogenomics and Risk of Cardiovascular Disease Study (PARC).** There were two clinical populations in the PARC study, which has been described in detail previously<sup>38</sup>. The first was derived from the Cholesterol Atherosclerosis Pharmacogenetics (CAP) Study. CAP subjects were recruited from two clinical sites located in Los Angeles and San Francisco, California. Participants were Caucasians, aged 30 and above, who received open label 40 mg simvastatin daily for 6 weeks. They were recruited on the basis of having plasma total cholesterol levels of 4.14-10.36 mmol/L (160-400 mg/dL). The second population was

derived from the Pravastatin Inflammation CRP Evaluation (PRINCE). These subjects were enrolled from 1,143 sites representing 49 states and the District of Columbia, with no single site enrolling more than 4 patients. Participants were Caucasians, aged 21 and older, who received 40 mg daily pravastatin for 12 weeks. They were recruited for having an LDL-cholesterol concentration  $\geq 3.5$  mmol/L ( $>135$  mg/dL) or a history of myocardial infarction, stroke, or coronary revascularization regardless of their baseline LDL-cholesterol. Subjects were excluded for baseline use of statins or other lipid lowering agents, pregnancy, lactation, alcohol or drug abuse, liver disease, known statin intolerance, uncontrolled diabetes, uncontrolled thyroid disease or abnormal thyroid function, or  $<90\%$  compliance with the study medication during a two-week run-in period. A total of 1,939 individuals were available for analysis.

**p. Rotterdam Baseline Study and Rotterdam Extension of Baseline Study.** The

Rotterdam Study is an ongoing prospective population-based cohort study, focused on chronic disabling conditions of the elderly. The study comprises an outbred ethnically homogenous population of Dutch Caucasian origin. The rationale of the study has been described in detail elsewhere<sup>39, 40</sup>. In summary, 7,983 men and women aged 55 years or older, living in Ommoord, a suburb of Rotterdam, the Netherlands, were invited to participate. A total of 5,701 individuals from the initial study were included in the current study. In 2000-2001, a second cohort was established with approximately 3,000 individuals, 1,628 of whom were included in this study.

**q. Supplementation en Vitamines et Mineraux Antioxydants (SUVIMAX)**

**Study.** The SUVIMAX study has been described previously<sup>41, 42</sup>. SUVIMAX was a controlled randomized primary prevention trial to study the effects of supplemented vitamins and minerals on cardiovascular disease and cancers in

French men and women between 45-60 and 35-60 years of age, respectively. A total of 1,813 individuals with lipid measurements were included in the current analysis.

- r. **Women's Genome Health Study (WGHS).** The WGHS has been described previously<sup>43</sup>. Participants were drawn from the Women's Health Study, where they had been followed over a 12-year period and monitored for serious health-related events, including myocardial infarction, stroke, and diabetes. Genome-wide genotyping was performed on individuals within the WGHS, and 22,041 participants with lipid measurements were included in the current analysis.

## II. Primary Analysis: Case-control samples

- a. **British Genetics of Hypertension (BRIGHT) Study.** The BRIGHT study has been described previously<sup>44</sup>. Individuals diagnosed with hypertension before age 60 were recruited to study hypertension, an important risk factor for coronary artery and cerebrovascular diseases. All individuals reported having four grandparents of white British ancestry. A total of 1,615 hypertensive cases with lipid measurements were included in the current analysis.
- b. **British 1958 Birth Cohort Type 1 Diabetes Genetics Consortium (B58C-T1DGC).** The B58C-T1DGC is a sample from the national population-based 1958 Birth Cohort collected in the UK and sampled periodically from birth to age 44-45 years<sup>26</sup>. Samples are distinct from those included in the B58C-WTCCC cohort described above. A total of 2,534 individuals with lipids measurements were included in the current analysis.
- c. **Diabetes Genetics Initiative (DGI).** The DGI study has been described in detail previously<sup>45, 46</sup>. The DGI study is a type 2 diabetes case-control study that

includes 1,588 T2D cases and 1,523 matched controls of European ancestry from Sweden and Finland. A total of 1,528 cases and 1,508 controls with lipid measurements were included in the current analysis.

- d. The European Prospective Investigation of Cancer-Norfolk Obese Cohort (EPIC-N-OBSET).** The EPIC-Norfolk studies have been described previously<sup>31, 32</sup>. EPIC-Norfolk is an ongoing prospective cohort study of chronic diseases comprising 25,663 Norfolk residents, an ethnically homogenous European origin population aged 39-79 years who were recruited from general practice registers between 1993 and 1997 for a first health examination. A subcohort of 1,078 obese ( $\text{BMI} \geq 30 \text{ kg} \cdot \text{m}^{-2}$ ) individuals with lipid measurements was included in the current analysis.
- e. The Family Heart Study (FHS).** The FHS is a multicenter study of the genetic and non-genetic risk factors for coronary heart disease and has been described in detail previously<sup>47</sup>. A total of 356 individuals with coronary heart disease and 394 controls with lipid measurements were available for the current analysis.
- f. Finland-United States Investigation of NIDDM Genetics (FUSION) Study.** The FUSION study has been described in detail previously<sup>48, 49</sup>. The FUSION GWAS is a type 2 diabetes (T2D) case-control study that includes 1,161 Finnish T2D cases and 1,174 normal glucose tolerant (NGT) controls. A total of 772 cases and 982 controls with lipid measurements were included in the current analysis.
- g. Health2000 GenMets Study.** The GenMets sample has been described in detail previously<sup>50</sup>. Individuals are metabolic syndrome cases and matched controls drawn from the Finnish Health2000 study. A total of 867 metabolic syndrome cases and 892 controls with genotype data and lipid measurements were included in the current analysis.

- h. MedSTAR Study.** MedSTAR is a cross-sectional study of coronary atherosclerosis that has been described in detail previously<sup>51</sup>. 1,500 subjects who underwent cardiac catheterization at the Washington Hospital Center between August 2004 and March 2007 were recruited to participate. The cohort is comprised of 874 cases with history of coronary artery disease (CAD) and 447 controls without history of CAD. A total of 716 CAD cases and 393 controls with genotype data and lipid measurements were included in the present study.
- i. PennCATH Study.** PennCATH is an angiographic study based at the University of Pennsylvania Medical Center that has been described previously<sup>52</sup>. Individuals who underwent cardiac catheterization at Penn between July 1998 and March 2003 were invited to participate. The cohort is comprised of 933 CAD cases and 468 controls with no history of CAD. The current analysis included 892 CAD cases and 454 controls with genotype data and lipid measurements available.

### **III. Primary Analysis: Family-based samples**

- a. Erasmus Rucphen Family (ERF) Study.** The ERF study has been described in detail previously<sup>53</sup>. A total of approximately 3,000 participants descend from 22 couples who lived in the Rucphen region in The Netherlands in the 19<sup>th</sup> century. A total of 1,108 individuals with genotype data and lipid measurements were included in the current analysis.
- b. Framingham Heart Study (FramHS).** The FramHS is a three generational prospective cohort that has been described in detail previously<sup>54</sup>. Individuals were initially recruited in 1948 in Framingham, USA to evaluate cardiovascular disease risk factors. The second generation cohort (5,124 offspring of the original cohort) was recruited between 1971 and 1975, and multiple lipid measurements were available and have been averaged. The third generation cohort (4,095 grand-

children of the original cohort) was collected between 2002 and 2005, and a single lipid measurement was available. The current analysis includes 7,132 individuals for whom genotypes and lipid measurements were available.

- c. MICROS Study of Population Microisolates in South Tyrol.** The MICROS study has been described in detail previously<sup>55</sup>. As part of the genomic healthcare program “GenNova,” an extensive survey was carried out during 2001–2003 in three villages of the Val Venosta (South Tyrol, Italy) on the populations of Stelvio, Vallelunga, and Martello. The current analysis includes 1,037 individuals for whom genotype data and lipid measurements were available.
- d. Northern Swedish Population Health Study (NSPHS).** The NSPHS is a family-based prospective population study in Sweden. The parish of Karesuando, in the subarctic region of the County of Norrbotten, has about 1,500 inhabitants, 740 of whom participated in the study. The region has experienced little immigration during the last 200 years. The current analysis included 593 individuals for whom genotypes and lipid measurements were available.
- e. Orkney Complex Disease Study (ORCADES).** ORCADES is an ongoing family-based genetic epidemiology collection in the isolated Scottish archipelago of Orkney. The current analysis included 633 individuals from a subgroup of the Orkney islands who had genotype data and lipid measurements available for study.
- f. SardiNIA Study of Aging.** The SardiNIA study has been described in detail previously<sup>56</sup>. The study includes 4,301 related individuals from the Ogliastra region of Sardinia, Italy who have been studied longitudinally for age-related quantitative traits. The current study included 4,184 individuals with genotype data and lipid measurements available.

- g. Vis Study.** The Vis study has been described in detail previously<sup>57</sup>. Croatians aged 18-93 years were recruited from the villages of Vis and Komiza on the Dalmatian island of Vis between 2003 and 2004. The current analysis included 771 individuals for whom genotype data and lipid measurements were available.

#### **IV. Replication (European and non-European) groups**

##### **a. East Asian cohorts**

- i. Cebu Longitudinal Health and Nutritional Survey (CLHNS).** The CLHNS is part of an ongoing study of a cohort of Filipino women who gave birth between 1983 and 1984 and has been described previously<sup>58</sup>. The four lipid traits were measured using blood plasma from the 2005 survey, and 1,789 women who were not taking lipid-lowering medication were included in this study. Samples were genotyped with the Affymetrix Genome-Wide Human SNP Array 5.0<sup>59</sup>, and HapMap SNPs polymorphic in both the 60 HapMap CEU founders and the 89 combined HapMap CHB+JPT samples were imputed using MACH version 1.0. Residuals were adjusted for age, age<sup>2</sup>, measures of socioeconomic status (total assets, natural log-transformed income), number of previous pregnancies, menopausal status, and seven principal components of variation representing population substructure.
- ii. Korea Association Resource (KARE) Project.** The KARE project was initiated in 2007 to perform large-scale genome-wide association analyses of the Ansung and Ansan population-based cohorts in Korea<sup>60</sup>. The cohorts were collected as part of the Korean Genome Epidemiology Study and included 5,018 Ansung and 5,020 Ansan inhabitants between 40 and 69 years of age. Individuals were collected in the Gyeonggi Province,

close to Seoul, Republic of Korea. All participants have been examined every two years since baseline, and more than 260 traits have been examined. Genotypes were obtained using the Affymetrix Genome-Wide Human SNP array 5.0, and a total of 352,228 markers were successfully genotyped in 8,842 individuals. A total of 8,801 subjects with lipid measurements and not taking lipid-lowering medications were included in the current analysis.

- iii. Singapore Malay Eye Study (SiMES).** The Singapore Malay Eye Study (SiMES) is a population-based cross-sectional epidemiological study of 3,280 individuals from one of the three major ethnic groups residing in Singapore<sup>61, 62</sup>. All subjects were Malay and aged 40-80 years. In summary, an age-stratified random sample comprised of 1,400 people from each decade of 40-49, 50-59, 60-69 and 70-79 was drawn from a computer-generated list of 15 residential districts provided by the Singapore Ministry of Home Affairs. Of the 5,600 names generated, a door to door household visit was made to confirm eligibility. Among the 4,168 eligible individuals, 3,280 participated in the study. In total, there are 2,542 Malays with genotypes on 557,824 autosomal SNPs from the Illumina610quad genotyping array. The 2,231 individuals not taking lipid-lowering drugs were included in the current analysis.
- iv. Singapore Prospective Study Program (SP2).** The SP2 is a population-based study of diabetes and cardiovascular disease in Singapore that has been described previously<sup>63</sup>. The SP2 has recruited 10,633 Chinese, Malay, and Indian subjects from four cross-sectional studies that were conducted in Singapore between 1984 and 1998. Subjects were aged 18-69 at baseline and represented a random sample of the Singapore

population, with over-sampling of the minority Malay and Indian ethnic groups to achieve a ratio of 60:20:20 in the overall sample. From 2003 to 2007, 7,772 subjects were re-contacted and interviewed, 5,094 of whom provided blood and other clinical data. In total, there are 2,434 Chinese individuals with genotypes on 489,028 common SNPs combined from three Illumina genotyping arrays, namely Illumina610quad, Illumina1Mduo and Illumina550v3. The 2,225 individuals not taking lipid-lowering drugs were included in the current analysis.

**b. South Asian cohort**

**i. London Life Sciences Prospective Population Study (LOLIPOP).**

LOLIPOP is an ongoing community cohort of approximately 30,000 individuals aged 35-75 years, recruited in West London, UK<sup>35</sup> to study the environmental and genetic factors that contribute to cardiovascular disease among UK Indian Asians. The study includes both European and Indian Asian subjects; Indian Asian participants reported having all four grandparents born on the Indian subcontinent, while European participants are self-classified whites born in Europe. For the current study, genotypes and lipid measurements were available for 9,705 Indian Asian individuals included in the cross-ethnic analysis.

**c. African American cohorts**

**i. National Heart, Lung, and Blood Institute Candidate Gene**

**Association Resource (NHLBI CARE).** These cohorts, including ARIC study, the Coronary Artery Risk Development in Young Adults study, the Cleveland Family Study, the Jackson Heart Study, and the Multi-Ethnic Study of Atherosclerosis, have previously been described<sup>64</sup>. For the

current study, genotypes and lipid measurements were available for 8,061 African American individuals included in the cross-ethnic analysis.

#### **d. European cohorts**

- i. deCODE.** The deCODE lipid study includes lipid measurements from Icelanders recruited through various genetic studies at deCODE, primarily cardiovascular studies<sup>65</sup>. The measurements were done between the years 1987 and 2008. For the current analysis we included individuals born after 1935 and excluded those using lipid lowering drugs. Genotypes and lipid measurements were thus available for 7,063 Icelanders included in the cross-ethnic analysis. The study was approved by the Icelandic Data Protection Commission and the National Bioethics Committee. All study participants signed informed consent and donated blood samples. Personal identities were encrypted by a third party system provided by the Icelandic Data Protection Commission.
- ii. Malmö Diet and Cancer Study – Cardiovascular Cohort (MDC-CC).** The Malmö Diet and Cancer Study, a community-based prospective epidemiologic cohort of 28,449 persons recruited for a baseline examination between 1991 and 1996<sup>66</sup>. From this cohort, 6,103 persons were randomly selected to participate in the cardiovascular cohort, which sought to investigate risk factors for cardiovascular disease. All participants underwent a medical history assessment and a physical examination. Of the participants in the cardiovascular cohort, 4,991 had DNA samples available for this analysis and data available for at least one lipoprotein or lipid phenotype.

**iii. National FINRISK 1997 Study (FINRISK97).** FINRISK97 was a population-based cross-sectional survey designed to study the prevalence of cardiovascular risk factors in Finland<sup>67</sup>. Surveys are conducted every 5 years, and the 1997 survey included 8,389 Finnish men and women aged 25–74. Participants underwent a physical examination and completed a questionnaire regarding cardiovascular risk factors. Of these FINRISK97 participants, 7,026 had DNA samples available for this analysis and data available for at least one lipoprotein or lipid phenotype.

## **V. Coronary artery disease cohorts**

**a. Coronary ARtery DIsease Genome-wide Replication And Meta-analysis (CARDIoGRAM) study.** CARDIoGRAM combines data from all published and several unpublished GWAS including individuals with European ancestry, includes >22,000 cases with CAD and/or MI and >60,000 controls, and unifies samples from Atherosclerotic Disease Vascular function and genetic Epidemiology study, CADomics, Cohorts for Heart and Aging Research in Genomic Epidemiology, deCODE, the German Myocardial Infarction Family Studies I, II, and III, Ludwigshafen Risk and Cardiovascular Health Study/AtheroRemo, MedStar, Myocardial Infarction Genetics Consortium, Ottawa Heart Genomics Study, PennCath, and the Wellcome Trust Case Control Consortium<sup>68</sup>. CAD was defined as: 1) coronary artery stenosis > 50% in at least one major epicardial artery; 2) fatal MI; 3) non-fatal MI based on ECG and cardiac biomarkers; 4) angina with positive stress testing; 5) percutaneous transluminal angioplasty; or 6) coronary artery bypass surgery. The control definition varied by study and ranged from population-based controls to self-reported freedom from CAD to lack of obstructive lesions on coronary angiography. Genotyping platforms and quality control criteria have been described<sup>68</sup>.

- b. COROGENE.** The COROGENE study includes individuals who underwent coronary angiography in Helsinki University Hospital, Finland and matched controls. Cases ( $n = 2,172$ ) were individuals admitted to the Helsinki University Hospital for acute coronary syndrome (unstable angina pectoris or acute myocardial infarction). Controls ( $n = 1,579$ ) were age- and sex- and area of residence matched individuals from the FINRISK 1997, 2002, or 2007 studies. Genotype and quality control criteria have been described<sup>69</sup>.

## **VI. Extreme lipids case-control cohorts**

- a. High HDL-C.** For the study of the cumulative effects of common variants in individuals at the extremes of the HDL distribution, cases with high HDL ( $>90^{\text{th}}$  percentile for age, gender, and race) were selected from the University of Pennsylvania High HDL Cholesterol Study (HHDL) and controls with low HDL ( $<30^{\text{th}}$  percentile for age, gender, and race) were selected from the University of Pennsylvania Catheterization cohort (PennCATH). HHDL is a cross-sectional study of genetic factors contributing to elevated HDL-C levels. Probands with elevated HDL-C ( $>75^{\text{th}}$  percentile for age and gender) were identified by physician referrals or through the Hospital of the University of Pennsylvania clinical laboratory<sup>70</sup>. Relatives of HHDL probands were also invited to participate in the study. Subjects completed a lifestyle questionnaire and provided a blood sample for the measurement of HDL and other lipid-related traits. Genotyping was performed at the Center for Applied Genomics (Children's Hospital of Pennsylvania) following manufacturer specifications for amplification and hybridization to the Affymetrix Genome-Wide Human SNP Array 6.0. Quality control measures to exclude unreliable SNPs and eliminate SNPs with genotype call rate  $< 95\%$ , with minor allele frequency (MAF)  $< 1\%$  or if there was significant departure from Hardy-Weinberg equilibrium ( $P < 1 \times 10^{-6}$  in combined

cases and controls) were performed. Imputation was conducted using a Hidden Markov Model algorithm as implemented in MACH.

- b. High LDL-C.** Blood samples of unrelated hypercholesterolemic patients were collected from 64 Dutch Lipid Clinics. Based on clinical criteria, all patients were suspected for familial hypercholesterolemia by cardiologists and internists using a uniform protocol and internationally accepted criteria<sup>71, 72</sup>. All patients were routinely analysed for the presence of mutations by direct sequencing of the complete *LDLR* and the LDL-receptor binding region of *APOB* (amino acids 3414 to 3588). For the identification of large rearrangements in the *LDLR* gene, a multiplex ligation-dependent probe (MLPA) technique with the Salsa P062 LDLR Exon Deletion Test Kit (MRC-Holland, Amsterdam, the Netherlands) was used, according to the manufacturer's instructions. For this analysis, we considered only the 344 patients in whom a functional *LDLR* or *APOB* mutation was *not* identified. After an overnight fast, blood was sampled, and plasma concentrations of total cholesterol, HDL-C, and triglycerides were measured by commercially available kits (Boehringer Mannheim, Mannheim, Germany). LDL-C concentrations were calculated by the Friedewald formula only when the triglyceride concentration was below 4.5 mmol/L. Genomic DNA was prepared from 10 ml whole blood on an AutopureLS apparatus according to a protocol provided by the manufacturer (Gentra Systems, Minneapolis, MI, USA).
- c. High triglycerides.** In total, 344 unrelated adult subjects of European ancestry with hypertriglyceridemia, defined as having untreated 12 h fasting plasma triglyceride concentrations >3 mmol/L on at least two occasions, were studied<sup>73</sup>. Patients were ascertained through a single tertiary referral lipid clinic, and had undergone complete medical history and examination, together with collection of demographic, clinical, and biochemical variables. Low triglyceride control

subjects were comprised of 144 unrelated adult subjects of European ancestry with fasting plasma triglyceride concentrations < 2.4 mmol/L, including both healthy population-based controls from Ontario and subjects with molecularly confirmed familial hypercholesterolemia. Study subjects were genotyped using the Affymetrix Genome-Wide Human SNP Array 6.0 platform (Affymetrix, Santa Clara, CA), according to protocols of the London Regional Genomics Centre ([www.lrgc.ca](http://www.lrgc.ca)). Genotypes were called using Affymetrix Genotyping Console, setting quality control thresholds for SNP call rate (95%), Hardy-Weinberg equilibrium ( $P > 0.0001$ ) and minor allele frequency (>1%). SNP imputation was subsequently conducted using phased haplotypes from the European HapMap cohort in MACH.

**Genotyping and imputation.** All cohorts were genotyped using commercially available Affymetrix or Illumina genotyping arrays, or custom Perlegen arrays. Quality control was performed independently for each study. To facilitate meta-analysis, each group performed genotype imputation using BIMBAM, IMPUTE, or MACH, with reference to the Phase II CEU HapMap<sup>74</sup>. Study-specific details are presented in **Supplementary Table 3**.

**Genome-wide association analyses.** Within each study, residual lipoprotein concentrations were determined after regression adjustment. To calculate residuals, each study included as covariates age, age<sup>2</sup>, and sex. Each group was given the option to include additional covariates (e.g., principal components, study site) to account for population structure; study-specific covariates are detailed in **Supplementary Table 3**. Residuals were normalized to have mean 0 and standard deviation 1, and normalized residuals were used as phenotypes to test for genotype-phenotype association. In each of the six twin cohorts (Australian, Danish National, Dutch National, Finnish National, TwinsUK, and Swedish National) monozygotic twin pairs were identified, lipid measurements were averaged for each pair, and a single individual with this average value was used to represent the pair.

In each study, each genotyped or imputed SNP was tested for association with each of the lipid traits, assuming an additive genetic model. Linear regression was employed for studies of unrelated individuals, and linear mixed effects models were used to account for family structure in the family-based studies. For the six case-control studies of type 2 diabetes (Diabetes Genetic Initiative, FUSION), myocardial infarction (MedSTAR, PennCATH), coronary heart disease (Family Heart Study), and metabolic syndrome (Health2000 GenMets), cases and controls were analysed separately to avoid confounding effects due to disease status. Each study excluded SNPs with  $MAF < 0.01$  and SNPs with poor imputation quality:  $Rsq < 0.3$  (BIMBAM and MACH) or  $proper\ info < 0.3$  (IMPUTE/SNPTEST). Since BIMBAM does not output an imputation quality score,  $Rsq$  was calculated manually as the ratio of observed to expected variance:  $var/[2p(1-p)]$ , where  $p$  is the minor allele frequency, and  $var$  is the sample variance of the estimated dosages.

**Meta-analysis of directly typed and imputed SNPs.** To combine association results across the 46 studies, we performed a fixed-effects meta-analysis using METAL for each of the four lipid traits. For each SNP, in each study, a Z-statistic was calculated that summarized the magnitude and direction of effect relative to a randomly selected reference allele. The overall Z-statistic was calculated from the weighted sum of the individual study statistics; weights were proportional to the square root of the sample size of each study and scaled so that squared weights summed to one. Each study was subjected to genomic control correction before inclusion in the meta-analysis to account for  $P$ -value inflation due to residual population structure or other confounding factors. For each of the six case-control studies, cases and controls were meta-analysed together to create a single dataset and genomic control correction was applied to each case-control dataset. Finally, the results of the overall meta-analysis were subjected to a second round of genomic control correction. As a result, the final genomic control lambda for each of the four sets of association results was exactly 1.0. Genomic control factors for the individual contributing studies and for the overall meta-analysis prior to genomic control correction are

provided in **Supplementary Table 4**. The pre-specified statistical significance threshold for heterogeneity (calculated in METAL) was  $P < 0.0005$  to account for multiple testing (102 SNPs in 95 loci tested).

To determine whether spurious associations arose as a result of imputation artifact, SNPs with  $r^2 \geq 0.8$  with the most highly associated SNP (“best SNP”) in the locus were identified, and from these the SNP directly genotyped on the greatest number of Illumina genotyping arrays and having the highest  $r^2$  with the best SNP was chosen as the “Proxy Illumina SNP.” The “Proxy Affymetrix SNP” was chosen in the same manner. **Supplementary Table 5** shows meta-analysis  $P$ -values for the best Illumina and Affymetrix proxy SNPs.

To ensure that the results were robust to whether or not principal components analysis (PCA) correction was used, we performed separate meta-analyses for cohorts in which principal components analysis (PCA) had been used ( $n = 47,782$ ) and cohorts in which PCA had not been used ( $n = 52,408$ ). We then calculated heterogeneity  $P$ -values between the groups for all SNPs well represented in each group (typed in  $>10,000$  individuals). We present the full results of this analysis in **Supplementary Table 19**. Overall, there was minimal evidence of heterogeneity between studies that used PCA to account for population structure and those that did not.

**Estimation of effect sizes.** To estimate regression coefficients in clinically interpretable units, we repeated the variance-weighted meta-analysis (using METAL) on untransformed HDL-C, LDL-C, TC, and log-transformed TG values (owing to skewness in the data) with exclusion criteria and covariates as before.

**Conditional analysis of top signals.** To identify additional lipid-associated SNPs at each of the reported loci and genome-wide, we repeated the primary association analysis for each trait, including genotypes or imputed dosages for the lead SNPs of genome-wide significant association signals as additional covariates. When data for a lead SNP were unavailable, high-

LD proxies were included instead. Association results for each study were again combined by fixed-effects meta-analysis. Genomic control correction was performed before meta-analysis on each study, and after meta-analysis on the meta-analysis results.

**Sex-specific analysis.** To detect loci that exhibit different effects in males and females, we repeated the primary analysis for each trait, analyzing males and females separately. For each trait, residuals were calculated separately for males and females, including covariates as described for the primary analysis. For each sex, residuals were normalized to have mean 0 and standard deviation 1, and normalized residuals were used as phenotypes to test for genotype-phenotype association. For both males and females, association results for each study were combined by fixed-effects meta-analysis. Genomic control correction was performed before meta-analysis on each study, and after meta-analysis on the meta-analysis results. For each SNP, heterogeneity of effect size between males and females was determined using the  $T$  statistic:

$$(b_m - b_w) / \sqrt{se_m^2 + se_w^2 - 2 \cdot r \cdot se_m \cdot se_w},$$

where  $b_m$  and  $b_w$  are the estimates of effect sizes for men and women, respectively,  $se_m$  and  $se_w$  are the standard errors estimated for men and women, respectively, and  $r$  is the Pearson's correlation between effect size estimates for males and females, across all SNPs. The pre-specified statistical significance threshold for heterogeneity was  $P < 0.0005$  to account for multiple testing (102 SNPs in 95 loci tested).

**Cis-expression quantitative trait locus analysis.** To determine whether lipid-associated SNPs might act as *cis*-regulators of nearby genes, we profiled expression levels of 39,280 transcripts in 960 human liver samples, 741 human omental fat samples, and 609 human subcutaneous fat samples. Tissue samples were collected postmortem or during surgical resection from donors; tissue collection, DNA and RNA isolation, expression profiling, and genotyping were performed as described<sup>75</sup>. MACH was used to obtain imputed genotypes for ~2.5 million SNPs in the

HapMap release 22 for each of the samples. We examined the correlation between each SNP and all transcripts within 500 kb of the SNP position, performing association analyses as previously described<sup>75</sup>.

**Analysis of lipid-associated SNPs in samples of European and non-European groups.** To investigate the relevance of our findings in non-European populations, lead SNPs reported in **Figure 1** were analysed in 9,705 South Asian, 15,046 East Asian, and 8,061 African American samples, as well as 7,063 separate European samples as a control cohort. Association testing was performed for each SNP-trait pair from **Figure 1**, using the same association testing strategy applied to the primary European samples. The pre-specified statistical significance threshold for heterogeneity between each of the non-European groups and the primary European samples was  $P < 0.0005$  to account for multiple testing (102 SNPs in 95 loci tested) (**Supplementary Table 11**).

To assess whether the observed concordance between effect directions in each replication group and the primary meta-analysis cohort was due to chance, we tested the overall number of concordant SNPs, regardless of  $P$ -value in the group, via a binomial draw with a null expectation of  $P = 0.5$ . To investigate whether the observed number of nominally significant, concordant associations in each group would be expected by chance, we performed the same test on SNPs with  $P < 0.05$  in the group, with a null expectation of  $P = 0.05$ .

For the additional European replication cohorts (MDC-CC and FINRISK97), with a total of 12,017 samples, a subset of the lead SNPs were directly genotyped using either the iPLEX Sequenom MassARRAY platform or allelic discrimination on an ABI 7900 instrument (Applied Biosystems). All reported SNPs had a genotyping call rate  $>95\%$  on the replication samples and had a Hardy-Weinberg equilibrium  $P > 0.001$ . Association testing was performed using the same strategy applied to the primary European samples.

**Analyses of lipid-associated SNPs in individuals with and without coronary artery disease.**

Lead SNPs associated with LDL-C, HDL-C, TG, and/or TC levels were queried in each of the CARDIoGRAM and COROGENE consortium samples for association with coronary artery disease (CAD), with a total of 24,607 individuals with CAD and 66,197 without CAD. The pooled test of association was determined by a weighted fixed-effects meta-analysis of these cohorts using METAL.

**Analysis of associated SNPs in patients with extreme LDL-C, HDL-C and TG levels.** Lead SNPs associated with LDL-C, HDL-C, and/or TG levels were tested in case-control cohorts ascertained based on extreme LDL-C, HDL-C, or TG concentrations, respectively. Logistic regression was used to test for association between dichotomous extreme status and genotypes for each SNP; age and sex were included as covariates in the model. In addition, for each individual, we constructed a genetic risk score statistic, given by the sum of risk allele counts, weighted by effect size, and adjusted for the number of SNPs genotyped. Weighted risk scores were adjusted for age and sex, by multiplying each covariate by the parameter estimate obtained by linear regression, and summed with the uncorrected, weighted risk score. Corrected/weighted risk scores were subsequently ranked by increasing score and divided into quartiles. Quartile 1 was the reference quartile, originating from the lowest risk scores. The number of cases and controls in each quartile were counted, and subsequently compared using chi-square analysis, generating odds ratios and *P*-values that correspond to each quartile's comparison to the reference. The significance of increasing odds ratios between quartiles was assessed using the Cochran-Armitage test for trend.

**Simulation studies to assess overlap between GWAS signals and Mendelian disease loci.** To estimate the overlap between the 95 loci identified in our GWAS and loci previously implicated in Mendelian dyslipidemias, we examined the proportion of lead SNPs falling within 0, 10, 20, 50 and 100 kb of a Mendelian dyslipidemia locus. To account for the fact that lead SNPs were located near genes more often than expected by chance and for bias in allele frequency due to

SNP ascertainment, we first organized all SNPs examined in our GWAS into a series of bins, each including SNPs with the same minor allele frequency (MAF) (rounded to the nearest 0.01) and the same number of flanking RefSeq genes (not rounded). Next, we counted the number of GWAS lead SNPs within each bin and sampled an appropriate number of SNPs from that bin. As an example, suppose that there were 10,000 analysed SNPs with MAF = 0.10 examined and which lie within 10 kb of at least one RefSeq gene; further, suppose two of these corresponded to GWAS lead SNPs. Our resampling scheme would ensure that every permuted dataset would also include exactly two SNPs from this bin. After generating 1,000,000 SNP sets, we tallied the average number of Mendelian loci hit per simulation and the maximum number of Mendelian loci hit in a single simulation. None of the simulations hit more Mendelian disease loci than that observed in our original GWAS.

**Mouse studies.** We created adeno-associated virus 8 (AAV8) vectors encoding the mouse orthologues of the *Galnt2* and *Ppp1r3b* genes, driven by the liver-specific thyroxine-binding globulin (TBG) promoter. We generated an AAV8 vector encoding an shRNA targeting the endogenous mouse *Galnt2* gene (sequence of hairpin:

GAAGTTGGAGATCTCATTCTTCAAGAGAGAATGAGATCTCCAAGTTC) driven by the U6 polymerase III promoter. We generated an adenoviral vector encoding an shRNA targeting the endogenous mouse *Ttc39b* gene (sequence of hairpin:

GCACAGTTGTCGAGTCTTTCTCTTCCTGTCAAGAAAGACTCGACAACGTGTC) driven by the U6 polymerase III promoter. Viral vectors encoding shRNAs with scrambled sequence were used as controls.

Separate groups of wild-type C57BL/6J mice (six per group for *Galnt2*, seven per group for *Ppp1r3b*) were injected via the peritoneal route with  $1 \times 10^{12}$  vector genomes/mouse of the relevant vectors. Plasma samples were taken immediately before vector administration, 14 days, and 28 days following vector administration for analysis of lipids. Lipid measurements were

performed on a Cobas Fara II autoanalyzer (Roche Diagnostic Systems Inc, Nutley, NJ) using Wako Chemicals (Richmond, VA) reagents. Upon sacrifice, livers were harvested and perfused with cold phosphate-buffered saline (PBS). Liver RNA was isolated using the mirVana microRNA isolation kit (Ambion, Inc., Austin, TX). Taqman Gene Expression Assays (Applied Biosystems, Foster City, California) were used to perform quantitative real-time polymerase chain reaction (qRT-PCR) measurements of transcript levels. Fast protein liquid chromatography (FPLC) was used to fractionate mouse plasma samples, followed by measurement of the cholesterol content. Cholesterol was measured enzymatically using the Cholesterol E kit from Wako Chemicals (Richmond, VA).

Separate groups of wild-type C57Bl/6 mice (six per group for *Ttc39b*) were injected with  $4 \times 10^9$  pfu of adenovirus in 0.2 mL via tail vein. Mice were sacrificed after four days or seven days, and blood samples were collected from the mice after six hours of fasting. Plasma HDL-C levels were measured by precipitation and an enzymatic procedure (Wako Chemicals, Richmond, VA).

**URLs.** Bayesian Imputation Based Association Mapping, BIMBAM, <http://quartus.uchicago.edu/~yguan/bimbam/index.html>; genotype imputation program, IMPUTE, <http://www.stats.ox.ac.uk/~marchini/software/gwas/impute.html>; Markov chain haplotyping package, MACH, <http://www.sph.umich.edu/csg/abecasis/MACH>; MACH2QTL, <http://www.sph.umich.edu/csg/abecasis/MACH/download>; pedigree analysis package, MERLIN, <http://www.sph.umich.edu/csg/abecasis/Merlin>; meta-analysis tool for GWASs, METAL, <http://www.sph.umich.edu/csg/abecasis/Metal/index.html>; whole-genome association analysis package, PLINK, <http://pngu.mgh.harvard.edu/~purcell/plink>; whole-genome association analysis of imputed data, ProbABEL, <http://mga.bionet.nsc.ru/~yurii/ABEL>; whole-genome association analysis software, QUICKTEST, <http://toby.freeshell.org/software/quicktest.shtml>;

statistical computer software, R, <http://www.r-project.org>; whole-genome association analysis package, SNPTTEST, <http://www.stats.ox.ac.uk/~marchini/software/gwas/snpctest.html>.

## Supplementary References

21. Harris, T.B. *et al.* Age, Gene/Environment Susceptibility-Reykjavik Study: multidisciplinary applied phenomics. *Am J Epidemiol.* **165**, 1076-1087 (2007).
22. ARIC Investigators. Atherosclerosis Risk in Communities (ARIC) Study: design and objectives. *Am. J. Epidemiol.* **129**, 687-702 (1989).
23. Peltonen, L. GenomEUtwin: a strategy to identify genetic influences on health and disease. *Twin Res.* **6**, 354-360 (2003).
24. Shock, R.C., Greulich, R.C. & Andres, R.A. Normal Human Aging: The Baltimore Longitudinal Study of Aging. *NIH publication no. 84-2450*, **45**. Washington D.C., U.S. Government Printing Office (1984).
25. The Wellcome Trust Case Control Consortium. Genome-wide association study of 14,000 cases of seven common diseases and 3,000 shared controls. *Nature.* **447**, 661-678 (2007).
26. Barrett, J.C. & *et al.* Genome-wide association study and meta-analysis find that over 40 loci affect risk of type 1 diabetes. *Nat. Genet.* **41**, 703-707 (2009).
27. Fried, L.P. *et al.* The Cardiovascular Health Study: design and rationale. *Ann. Epidemiol.* **1**, 263-276 (1991).
28. Firmann, M. *et al.* The CoLaus study: a population-based study to investigate the epidemiology and genetic determinants of cardiovascular risk factors and metabolic syndrome. *BMC Cardiovasc. Disord.* **8**, 6 (2008).
29. Wichmann, H.E., Gieger, C. & Illig, T. KORA-gen—resource for population genetics, controls and a broad spectrum of disease phenotypes. *Gesundheitswesen.* **67 Suppl 1**, S26-S30 (2008).
30. Heid, I.M. *et al.* Association of the 103I MC4R allele with decreased body mass in 7937 participants of two population based surveys. *J. Med. Genet.* **42**, e21 (2005).

31. Day, N. *et al.* EPIC-Norfolk: study design and characteristics of the cohort. European Prospective Investigation of Cancer. *Br. J. Cancer*. **80**, 95-103 (1999).
32. Harding, A.H. *et al.* Dietary fat and the risk of clinical type 2 diabetes: the European Prospective Investigation of Cancer-Norfolk study. *Am. J. Epidemiol.* **159**, 73-82 (2004).
33. Ferucci, L. *et al.* Subsystems contributing to the decline in ability to walk: bridging the gap between epidemiology and geriatric practice in the InCHIANTI study. *J. Am. Geriatr. Soc.* **48**, 1618-1625 (2000).
34. Bartali, B. *et al.* Changes in anthropometric measures in men and women across the life-span: findings from the InCHIANTI study. *Soz. Praventivmed.* **47**, 336-348 (2002).
35. Chambers, J.C. *et al.* Common genetic variation near MC4R is associated with waist circumference and insulin resistance. *Nat. Genet.* **40**, 716-718 (2008).
36. Vartiainen, E. *et al.* Thirty-five-year trends in cardiovascular risk factors in Finland. *Int. J. Epidemiol.* **39**, 504-518 (2010).
37. Rantakallio, P. Groups at risk in low birth weight infants and perinatal mortality. *Acta Paed Scand.* **193 Suppl 193**, 1-71 (1969).
38. Reiner, A.P. *et al.* Polymorphisms of the HNF1A gene encoding hepatocyte nuclear factor-1 alpha are associated with C-reactive protein. *Am. J. Hum. Genet.* **82**, 1193-1201 (2008).
39. Hofman, A., Grobbee, D.E., de Jong, P.T., & van den Ouweland, F.A. Determinants of disease and disability in the elderly: the Rotterdam Elderly Study. *Eur. J. Epidemiol.* **7**, 403-22 (1991).
40. Hofman, A. *et al.* The Rotterdam Study: objectives and design update. *Eur. J. Epidemiol.* **22**, 819-829 (2007).
41. Hercberg, S. *et al.* A primary prevention trial using nutritional doses of antioxidant vitamins and minerals in cardiovascular diseases and cancers in a general population: the SU.VI.MAX

study--design, methods, and participant characteristics. Supplementation en Vitamines et Minéraux AntioXydants. *Control Clin. Trials*. **19**, 336-351 (1998).

42. Hercberg, S. *et al.* Background and rationale behind the SU.VI.MAX Study, a prevention trial using nutritional doses of a combination of antioxidant vitamins and minerals to reduce cardiovascular diseases and cancers. Supplementation en Vitamines et Minéraux AntioXydants Study. *Int. J. Vitam. Nutr. Res.* **68**, 3-20 (1998).

43. Ridker, P.M. *et al.* Rationale, design, and methodology of the Women's Genome Health Study: a genome-wide association study of more than 25,000 initially healthy American women. *Clin. Chem.* **54**, 249-55 (2008).

44. Caulfield, M. *et al.* Genome-wide mapping of human loci for essential hypertension. *Lancet*. **361**, 2118-2123 (2003).

45. Diabetes Genetics Initiative of Broad Institute of Harvard and MIT, Lund University, and Novartis Institutes of BioMedical Research *et al.* Genome-wide association analysis identifies loci for type 2 diabetes and triglyceride levels. *Science*. **316**, 1331-1336 (2007).

46. Groop, L. *et al.* Metabolic consequences of a family history of NIDDM (the Botnia study): evidence for sex-specific parental effects. *Diabetes*. **45**, 1585-93 (1996).

47. Arnett, D.K. *et al.* Angiotensinogen and angiotensin converting enzyme genotypes and carotid atherosclerosis: the Atherosclerosis Risk in Communities and the NHLBI Family Heart Studies. *Atherosclerosis*. **138**, 111-116 (1998).

48. Valle, T. *et al.* Mapping genes for NIDDM. Design of the Finland-United States Investigation of NIDDM Genetics (FUSION) Study. *Diabetes Care*. **21**, 949-958 (1998).

49. Scott, L.J. *et al.* A genome-wide association study of type 2 diabetes in Finns detects multiple susceptibility variants. *Science*. **316**, 1341-1345 (2007).

50. Perttilä, J. *et al.* OSBPL10, a novel candidate gene for high triglyceride trait in dyslipidemic Finnish subjects, regulates cellular lipid metabolism. *J. Mol. Med.* **87**, 825-835 (2009).

51. Myocardial Infarction Genetics Consortium *et al.* Genome-wide association of early-onset myocardial infarction with single nucleotide polymorphisms and copy number variants. *Nat. Genet.* **41**, 334-341 (2009).
52. Lehrke, M. *et al.* CXCL16 is a marker of inflammation, atherosclerosis, and acute coronary syndromes in humans. *J. Am. Coll. Cardiol.* **49**, 442-449 (2007).
53. Pardo, L.M., MacKay, I., Oostra, B., van Duijn, C.M. & Aulchenko, Y.S. The effect of genetic drift in a young genetically isolated population. *Ann. Hum. Genet.* **69**, 288-295 (2005).
54. Kannel, W.B. *et al.* III. Factors of risk in the development of coronary heart disease—six year follow-up experience. The Framingham Study. *Ann. Intern. Med.* **55**, 33-50 (1961).
55. Pattaro, C. *et al.* The genetic study of three population microisolates in South Tyrol (MICROS): study design and epidemiological perspectives. *BMC Med. Genet.* **8**, 29 (2007).
56. Pilia, G. *et al.* Heritability of cardiovascular and personality traits in 6,148 Sardinians. *PLoS Genet.* **2**, e132 (2006).
57. Rudan, I., Campbell, H. & Rudan, P. Genetic epidemiological studies of eastern Adriatic Island isolates, Croatia: objective and strategies. *Coll. Antropol.* **23**, 531-546 (1999).
58. Feranil, A., Gultiano, S. & Adair, L.S. The Cebu Longitudinal Health and Nutrition Survey: two decades later. *Asia Pac. Popul. J.* **23**, 39-54 (2008).
59. Lange, L.A. *et al.* Genome-wide association study of homocysteine levels in Filipinos provides evidence for CPS1 in women and a stronger MTHFR effect in young adults. Submitted.
60. Cho, Y.S. *et al.* A large-scale genome-wide association study of Asian populations uncovers genetic factors influencing eight quantitative traits. *Nat. Genet.* **41**, 527-534 (2009).
61. Foong, A.W. *et al.* Rationale and methodology for a population-based study of eye diseases in Malay people: the Singapore Malay Eye Study (SiMES). *Ophthalmic Epidemiol.* **14**, 25-35 (2007).

62. Wong, T.Y. *et al.* Prevalence and causes of low vision and blindness in an urban Malay population: the Singapore Malay Eye Study. *Arch. Ophthalmol.* **126**, 1091-1099 (2008).
63. Nang, E.E. *et al.* Is there a clear threshold for fasting plasma glucose that differentiates between those with and without neuropathy and chronic kidney disease?: the Singapore Prospective Study Program. *Am. J. Epidemiol.* **169**, 1454-1462 (2009).
64. Musunuru, K. *et al.* Candidate Gene Association Resource (CARE): design, methods, and proof of concept. *Circ. Cardiovasc. Genet.*, in the press.
65. Helgadottir, A. *et al.* A common variant on chromosome 9p21 affects the risk of myocardial infarction. *Science*. **316**, 1491-1493 (2007).
66. Berglund, G., Elmstahl, S., Janzon, L. & Larsson, S.A. The Malmö Diet and Cancer Study. Design and feasibility. *J. Intern. Med.* **233**, 45-51 (1993).
67. Vartiainen, E. *et al.* Cardiovascular risk factor changes in Finland, 1972–1997. *Int. J. Epidemiol.* **29**, 49-56 (2000).
68. Preuss, M. *et al.* Design of the Coronary ARtery DIsease Genome-wide Replication And Meta-Analysis (CARDIoGRAM) Study—a genome-wide association meta-analysis involving more than 22,000 cases and 60,000 controls. Submitted.
69. Soranzo, N. *et al.* A genome-wide meta-analysis identifies 22 loci associated with eight hematological parameters in the HaemGen consortium. *Nat. Genet.* **41**, 1182-1190 (2009).
70. Lehrke, M. *et al.* CXCL16 is a marker of inflammation, atherosclerosis, and acute coronary syndromes in humans. *J. Am. Coll. Cardiol.* **49**, 442-449 (2007).
71. Defesche, J.C. Familial hypercholesterolemia. In: Betteridge, D.J., ed. *Lipids and Vascular Disease: Current Issues*. London: Martin Dunitz, 65-76 (2000).

72. Goldstein, J.L., Hobbs, H.H. & Brown, M.S. Familial hypercholesterolemia. In: Scriver, C.R., Beaudet, A.L., Sly, W.S. & Valle, D., eds. *The Metabolic and Molecular Basis of Inherited Disease*. New York: McGraw-Hill, 1981-2030 (1995).
73. Hegele, R.A. *et al.* A polygenic basis for four classical Fredrickson hyperlipoproteinemia phenotypes that are characterized by hypertriglyceridemia. *Hum. Mol. Genet.* **18**, 4189-4194 (2009).
74. Li, Y., Willer, C., Sanna, S. & Abecasis, G. Genotype imputation. *Annu. Rev. Genomics Hum. Genet.* **10**, 387-406 (2009).
75. Schadt, E. E. *et al.* Mapping the genetic architecture of gene expression in human liver. *PLoS Biol.* **6**, e107 (2008).

## Supplementary Figure Legends

**Supplementary Figure 1.** Quantile-quantile plots for test statistics, with observed association  $P$ -values plotted as a function of expected  $P$ -values. For each trait, the same data is presented with two differing y-axis scales. Black line, all test statistics; blue line, previously reported loci excluded; green line, genome-wide significant loci confirmed or identified in this study excluded.

**Supplementary Figure 2. Sex-specific effect of rs1562398 on plasma TG levels.**

Regional plots of the *KLF14* locus. Purple diamonds indicate rs1562398, which in women has the strongest association evidence in the locus. Each circle indicates a SNP with the color of the circle indicating the linkage disequilibrium ( $r^2$ ) between that SNP and rs1562398. Blue lines indicate estimated recombination rates in HapMap. The bottom panels show the relative position and the transcribed strand of each gene in the locus.

**Supplementary Figure 3. Analysis of genotype scores in patients with extreme**

**lipid levels.** Genotype scores were calculated for LDL-C, HDL-C, and TG in each case (high lipid level) or control (low lipid level) individual. For each analysis, individuals were stratified into quartiles of the genotype score. Quartile 1 (Q1) is the reference quartile, originating from the lowest scores. Shown are odds ratios for case status for each quartile in comparison to Q1. Bars indicate 95% confidence intervals.

Supplementary Figure 1.

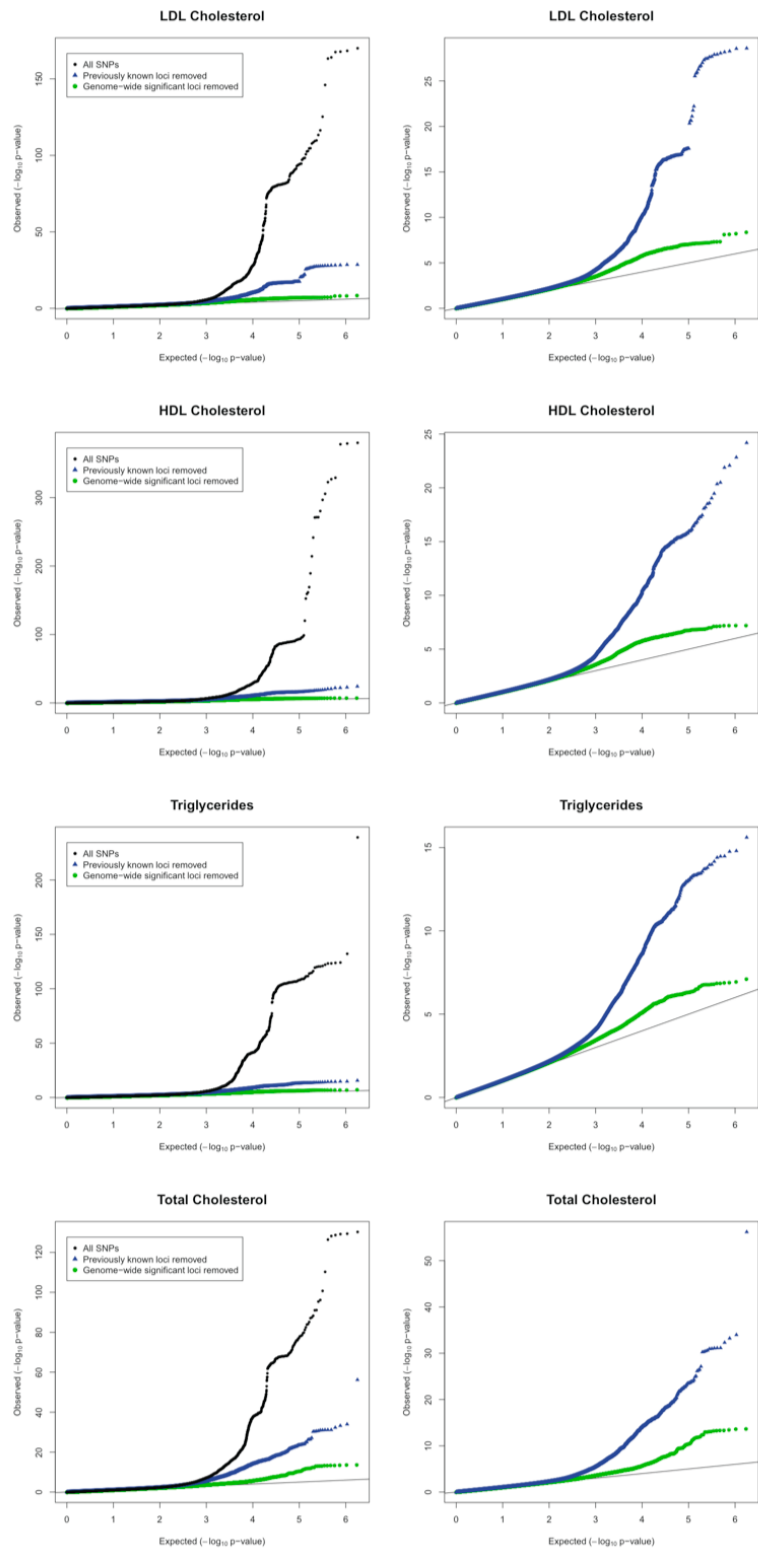

Supplementary Figure 2.

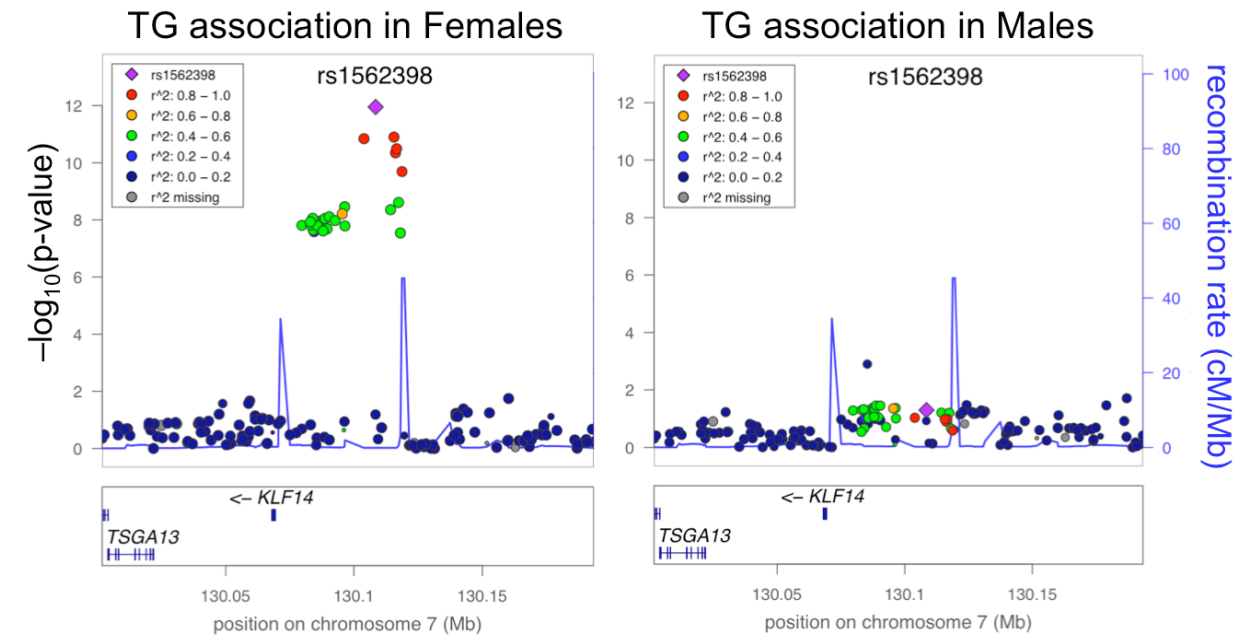

Supplementary Figure 3.

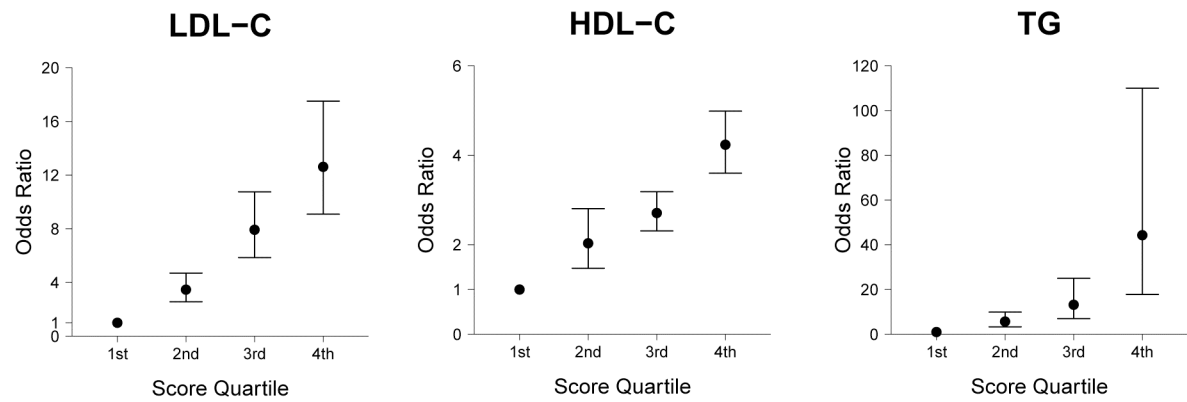

**Supplementary Table 1.** Cohort characteristics.

|                         | Study         | <i>n</i>                                                           | Country of origin | Mean age, years | % Female    | Total cholesterol (TC), mg/dL | LDL cholesterol, mg/dL | HDL cholesterol, mg/dL | Triglycerides (TG), mg/dL |           |
|-------------------------|---------------|--------------------------------------------------------------------|-------------------|-----------------|-------------|-------------------------------|------------------------|------------------------|---------------------------|-----------|
| Community-based cohorts |               |                                                                    |                   |                 |             |                               |                        |                        |                           |           |
|                         | AGES          | Age, Gene/Environment Susceptibility Reykjavik Study               | 2,485             | Iceland         | 76.6 ± 5.7  | 61.6                          | 230 ± 40               | 147 ± 36               | 62 ± 17                   | 103 ± 48  |
|                         | ARIC          | Atherosclerosis Risk in Communities Study                          | 7,841             | US              | 54.3 ± 5.7  | 53.0                          | 214 ± 40               | 137 ± 37               | 51 ± 17                   | 135 ± 88  |
|                         | MZGWA-AUS     | Australian Twin Cohort                                             | 449               | Australia       | 46.8 ± 12.5 | 100.0                         | 220 ± 39               | 133 ± 37               | 61 ± 10                   | 139 ± 82  |
|                         | BLSA          | Baltimore Longitudinal Study of Aging                              | 713               | US              | 68.9 ± 17.4 | 56.0                          | 188 ± 37               | 110 ± 32               | 56 ± 17                   | 112 ± 86  |
|                         | B58C-WTCCC    | British 1958 Birth Cohort – Wellcome Trust Case Control Consortium | 1,459             | UK              | 44.9 ± 0.4  | 49.9                          | 227 ± 42               | 131 ± 35               | 60 ± 15                   | 186 ± 134 |
|                         | CHS           | Cardiovascular Health Study                                        | 3,121             | US              | 72.4 ± 5.4  | 60.4                          | 212 ± 39               | 130 ± 35               | 55 ± 16                   | 139 ± 75  |
|                         | CoLaus        | The Cohorte Lausannoise Study                                      | 5,253             | Switzerland     | 53.2 ± 10.8 | 52.3                          | 217 ± 40               | 148 ± 42               | 63 ± 17                   | 124 ± 107 |
|                         | KORA          | KORA - Cooperative Health Research in the Region of Augsburg       | 1,405             | Germany         | 62.5 ± 10.1 | 51.0                          | 225 ± 39               | 134 ± 32               | 59 ± 17                   | 168 ± 116 |
|                         | MZGWA-DK      | Danish Twins Registry                                              | 142               | Denmark         | 44.2 ± 19.2 | 100.0                         | 210 ± 46               | 121 ± 35               | 63 ± 15                   | 103 ± 34  |
|                         | MZGWA-NLD     | Dutch Twins Registry                                               | 289               | Netherlands     | 33.8 ± 11.9 | 100.0                         | 189 ± 36               | 109 ± 33               | 60 ± 14                   | 100 ± 43  |
|                         | EPIC-N-SUBCOH | EPIC-Norfolk Subcohort                                             | 2,346             | UK              | 59.3 ± 9.0  | 53.2                          | 239 ± 44               | 170 ± 42               | 55 ± 16                   | 161 ± 98  |
|                         | FENLAND       | Fenland Study                                                      | 1,401             | UK              | 45.0        | 56.1                          | 208 ± 39               | 130 ± 34               | 57 ± 15                   | 107 ± 74  |
|                         | MZGWA-FIN     | Finnish National Twin Cohort                                       | 137               | Finland         | 60.8 ± 15.4 | 100.0                         | 208 ± 31               | 134 ± 33               | 62 ± 17                   | 106 ± 58  |
|                         | InCHIANTI     | Invecchiare in Chianti Study†                                      | 1,134             | Italy           | 68.2 ± 15.9 | 55.6                          | 213 ± 40               | 132 ± 35               | 56 ± 15                   | 123 ± 75  |
|                         | LOLIPOP       | London Life Sciences Prospective Population Study                  | 1,599             | UK              | 54.4        | 12.8                          | 205 ± 43               | 124 ± 37               | 51 ± 14                   | 152 ± 118 |
|                         | FINRISK       | National FINRISK Study                                             | 910               | Finland         | 59.6 ± 10.7 | 34.7                          | 219 ± 40               | 135 ± 34               | 55 ± 16                   | 142 ± 87  |
|                         | NFBC66        | Northern Finland Birth Cohort 1966                                 | 5,138             | Finland         | 31 ± 0.0    | 51.9                          | 196 ± 39               | 116 ± 34               | 60 ± 15                   | 105 ± 63  |
|                         | PARC          | Pharmacogenomics and Risk of Cardiovascular Disease Study*         | 1,939             | US              | 61.6 ± 13.7 | 30.6                          | 214 ± 38               | 138 ± 32               | 42 ± 15                   | 178 ± 118 |
|                         | RS-I          | Rotterdam Study Baseline                                           | 5,701             | Netherlands     | 69.5 ± 9.1  | 59.3                          | 255 ± 47               | 145 ± 34               | 52 ± 14                   | 135 ± 65  |
|                         | RS-II         | Rotterdam Study Extension of Baseline                              | 1,628             | Netherlands     | 64.7 ± 8.1  | 55.0                          | 227 ± 38               | 146 ± 35               | 54 ± 14                   | 139 ± 79  |
|                         | MZGWA-UK      | Twins UK                                                           | 457               | UK              | 51.9 ± 11.2 | 100.0                         | 205 ± 41               | 130 ± 36               | 58 ± 15                   | 86 ± 68   |
|                         | SUVIMAX       | Supplementation en Vitamines et Mineraux Antioxydants Study        | 1,813             | France          | 50.1 ± 6.3  | 62.0                          | 225 ± 32               | 138 ± 32               | 63 ± 15                   | 92 ± 47   |
|                         | MZGWA-SWE     | Swedish National Twin Cohort                                       | 297               | Sweden          | 71.9 ± 5.9  | 100.0                         | 233 ± 34               | 149 ± 31               | 60 ± 15                   | 127 ± 60  |

|                      |                                                                    |        |                 |             |       |          |          |         |           |
|----------------------|--------------------------------------------------------------------|--------|-----------------|-------------|-------|----------|----------|---------|-----------|
| WGHS                 | Women's Genome Health Study*                                       | 22,041 | US              | 54.6 ± 7.1  | 100.0 | 211 ± 41 | 124 ± 34 | 54 ± 15 | 142 ± 89  |
| Case-control samples |                                                                    |        |                 |             |       |          |          |         |           |
| BRIGHT               | British Genetics of Hypertension Study Cases                       | 1,615  | UK              | 56.4 ± 11.3 | 61.5  | 216 ± 40 | 148 ± 37 | 52 ± 15 | 191 ± 134 |
| B58C-T1DGC           | British 1958 Birth Cohort T1D Controls                             | 2,534  | UK              | 45.3 ± 0.3  | 51.3  | 228 ± 42 | 132 ± 35 | 60 ± 15 | 186 ± 153 |
| DGI                  | Diabetes Genetics Initiative T2D Cases†                            | 1,528  | Finland, Sweden | 64.3 ± 10.5 | 49.7  | 224 ± 46 | 146 ± 40 | 45 ± 12 | 175 ± 124 |
| DGI                  | Diabetes Genetics Initiative Controls†                             | 1,508  | Finland, Sweden | 58.8 ± 10.4 | 51.5  | 229 ± 42 | 155 ± 39 | 51 ± 13 | 118 ± 61  |
| EPIC-N-OBSET         | EPIC-Norfolk Obese Cases                                           | 1,078  | UK              | 59.3 ± 8.8  | 56.9  | 246 ± 44 | 179 ± 41 | 49 ± 15 | 205 ± 110 |
| FHS                  | Family Heart Study CHD Cases                                       | 356    | US              | 55.1 ± 11.6 | 54.5  | 213 ± 43 | 132 ± 38 | 49 ± 13 | 158 ± 77  |
| FHS                  | Family Heart Study Controls                                        | 394    | US              | 54.9 ± 11.1 | 50.3  | 202 ± 36 | 123 ± 32 | 52 ± 16 | 134 ± 68  |
| FUSION               | Finland-United States Investigation of NIDDM Genetics T2D Cases    | 772    | Finland         | 62.7 ± 7.7  | 41.2  | 221 ± 44 | 140 ± 38 | 47 ± 13 | 180 ± 114 |
| FUSION               | Finland-United States Investigation of NIDDM Genetics T2D Controls | 982    | Finland         | 63.1 ± 7.5  | 49.2  | 227 ± 38 | 146 ± 35 | 58 ± 16 | 120 ± 59  |
| GENMETS              | Health2000 GenMets MS Cases                                        | 867    | Finland         | 49.9 ± 11.1 | 51.2  | 240 ± 45 | 153 ± 42 | 45 ± 12 | 187 ± 103 |
| GENMETS              | Health2000 GenMets Controls                                        | 892    | Finland         | 49.9 ± 11.0 | 51.2  | 228 ± 38 | 141 ± 37 | 57 ± 14 | 109 ± 51  |
| MedSTAR              | MedSTAR MI Cases                                                   | 716    | US              | 54.7 ± 7.3  | 28.2  | 170 ± 44 | 101 ± 39 | 43 ± 16 | 155 ± 110 |
| MedSTAR              | MedSTAR Controls                                                   | 393    | US              | 59.7 ± 8.9  | 48.8  | 180 ± 39 | 106 ± 33 | 50 ± 16 | 127 ± 79  |
| PennCATH             | PennCATH MI Cases                                                  | 892    | US              | 56.9 ± 9.2  | 24.3  | 179 ± 43 | 107 ± 9  | 42 ± 11 | 179 ± 43  |
| PennCATH             | PennCATH Controls                                                  | 454    | US              | 61.7 ± 9.5  | 51.7  | 179 ± 39 | 108 ± 32 | 49 ± 15 | 114 ± 83  |
| Family-based samples |                                                                    |        |                 |             |       |          |          |         |           |
| ERF                  | Erasmus Rucphen Family Study                                       | 1,108  | Netherlands     | 47.1 ± 14.7 | 60.8  | 219 ± 43 | 148 ± 38 | 50 ± 14 | 115 ± 68  |
| FramHS               | Framingham Heart Study                                             | 7,132  | US              | 44.8 ± 10.6 | 54.0  | 198 ± 36 | 122 ± 33 | 53 ± 15 | 117 ± 84  |
| MICROS               | MICROS Study of Population Microisolates in South Tyrol            | 1,037  | Austria         | 44.4 ± 15.8 | 56.5  | 227 ± 47 | 137 ± 43 | 65 ± 14 | 125 ± 90  |
| NSPHS                | Northern Swedish Population Health Study                           | 593    | Sweden          | 44.8 ± 20.4 | 54.0  | 228 ± 52 | 138 ± 42 | 62 ± 16 | 192 ± 138 |
| ORCADES              | Orkney Complex Disease Study                                       | 633    | UK              | 51.9 ± 16.7 | 54.5  | 227 ± 43 | 141 ± 41 | 66 ± 15 | 115 ± 58  |
| SardiNIA             | SardiNIA Study of Aging                                            | 4,184  | Italy           | 43.6 ± 17.6 | 56.0  | 208 ± 31 | 127 ± 29 | 64 ± 15 | 86 ± 54   |
| Vis                  | Vis Study                                                          | 771    | Croatia         | 56.5 ± 15.4 | 58.0  | 197 ± 39 | 125 ± 37 | 43 ± 6  | 151 ± 82  |

\* PARC is a pharmacogenetic genetic study; WGHS is a prospective clinical trial

† The DGI and InCHIANTI studies each included a small number of related individuals.

**Supplementary Table 2.** Findings of the primary meta-analysis.

| Nearby genes*   | Lead SNP   | Trait | Best SNP   | Chr | Position†   | <i>n</i> | Major allele,<br>minor allele<br>(MAF)‡ | Effect size (SE)<br>mg/dL§ | <i>P</i> -value         | Previous<br>GWAS<br>finding? |
|-----------------|------------|-------|------------|-----|-------------|----------|-----------------------------------------|----------------------------|-------------------------|------------------------------|
| <i>LDLRAP1</i>  | rs12027135 | TC    | rs12027135 | 1   | 25,648,320  | 100,184  | T, A (0.47)                             | -1.22 (0.19)               | $4.12 \times 10^{-11}$  | Y                            |
|                 |            | LDL   | rs12027135 | 1   | 25,648,320  | 95,454   | T, A (0.47)                             | -1.10 (0.18)               | $1.24 \times 10^{-10}$  | N                            |
| <i>PABPC4</i>   | rs4660293  | HDL   | rs4660293  | 1   | 39,800,767  | 99,855   | A, G (0.23)                             | -0.48 (0.09)               | $3.99 \times 10^{-10}$  | N                            |
| <i>PCSK9</i>    | rs2479409  | TC    | rs2479409  | 1   | 55,277,238  | 100,164  | A, G (0.30)                             | 1.96 (0.24)                | $3.84 \times 10^{-24}$  | N                            |
|                 |            | LDL   | rs2479409  | 1   | 55,277,238  | 95,435   | A, G (0.30)                             | 2.01 (0.22)                | $1.93 \times 10^{-28}$  | Y                            |
| <i>ANGPTL3</i>  | rs2131925  | TC    | rs3850634  | 1   | 62,823,186  | 97,148   | T, G (0.32)                             | -2.60 (0.20)               | $4.90 \times 10^{-41}$  | Y                            |
|                 |            | LDL   | rs3850634  | 1   | 62,823,186  | 92,503   | T, G (0.32)                             | -1.59 (0.19)               | $2.63 \times 10^{-18}$  | N                            |
|                 |            | TG    | rs2131925  | 1   | 62,798,530  | 96,598   | T, G (0.32)                             | -4.94 (0.40)               | $8.84 \times 10^{-43}$  | Y                            |
| <i>EVI5</i>     | rs7515577  | TC    | rs7515577  | 1   | 92,782,026  | 100,165  | A, C (0.21)                             | -1.18 (0.24)               | $2.78 \times 10^{-08}$  | N                            |
| <i>SORT1</i>    | rs629301   | TC    | rs629301   | 1   | 109,619,829 | 100,184  | T, G (0.22)                             | -5.41 (0.24)               | $5.77 \times 10^{-131}$ | Y                            |
|                 |            | LDL   | rs629301   | 1   | 109,619,829 | 95,454   | T, G (0.22)                             | -5.65 (0.21)               | $9.70 \times 10^{-171}$ | Y                            |
| <i>ZNF648</i>   | rs1689800  | HDL   | rs1689800  | 1   | 180,435,508 | 99,900   | A, G (0.35)                             | -0.47 (0.08)               | $3.18 \times 10^{-10}$  | N                            |
| <i>MOSCI</i>    | rs2642442  | TC    | rs2807834  | 1   | 219,037,216 | 100,098  | G, T (0.32)                             | -1.38 (0.22)               | $4.90 \times 10^{-13}$  | N                            |
|                 |            | LDL   | rs2807834  | 1   | 219,037,216 | 95,372   | G, T (0.32)                             | -1.09 (0.20)               | $5.62 \times 10^{-11}$  | N                            |
| <i>GALNT2</i>   | rs4846914  | HDL   | rs4846914  | 1   | 228,362,314 | 99,881   | A, G (0.40)                             | -0.61 (0.07)               | $3.66 \times 10^{-21}$  | Y                            |
|                 |            | TG    | rs1321257  | 1   | 228,371,935 | 92,418   | A, G (0.39)                             | 2.76 (0.38)                | $2.09 \times 10^{-14}$  | Y                            |
| <i>IRF2BP2</i>  | rs514230   | TC    | rs514230   | 1   | 232,925,220 | 100,184  | T, A (0.48)                             | -1.36 (0.20)               | $5.37 \times 10^{-14}$  | N                            |
|                 |            | LDL   | rs514230   | 1   | 232,925,220 | 95,454   | T, A (0.48)                             | -1.13 (0.18)               | $9.38 \times 10^{-12}$  | N                            |
| <i>APOB</i>     | rs1367117  | TC    | rs1367117  | 2   | 21,117,405  | 100,176  | G, A (0.30)                             | 4.16 (0.22)                | $4.08 \times 10^{-96}$  | Y                            |
|                 |            | LDL   | rs1367117  | 2   | 21,117,405  | 95,446   | G, A (0.30)                             | 4.05 (0.19)                | $4.48 \times 10^{-114}$ | Y                            |
|                 | rs1042034  | HDL   | rs1042034  | 2   | 21,078,786  | 99,892   | T, C (0.22)                             | 0.90 (0.09)                | $1.22 \times 10^{-30}$  | Y                            |
|                 |            | TG    | rs1042034  | 2   | 21,078,786  | 96,590   | T, C (0.22)                             | -5.99 (0.45)               | $1.36 \times 10^{-45}$  | Y                            |
| <i>GCKR</i>     | rs1260326  | TC    | rs1260326  | 2   | 27,584,444  | 100,176  | C, T (0.41)                             | 1.91 (0.19)                | $7.31 \times 10^{-27}$  | N                            |
|                 |            | TG    | rs1260326  | 2   | 27,584,444  | 96,590   | C, T (0.41)                             | 8.76 (0.40)                | $5.68 \times 10^{-133}$ | Y                            |
| <i>ABCG5/8</i>  | rs4299376  | TC    | rs4299376  | 2   | 43,926,080  | 95,992   | T, G (0.30)                             | 3.01 (0.22)                | $4.03 \times 10^{-45}$  | Y                            |
|                 |            | LDL   | rs4299376  | 2   | 43,926,080  | 91,285   | T, G (0.30)                             | 2.75 (0.20)                | $1.73 \times 10^{-47}$  | Y                            |
| <i>RAB3GAP1</i> | rs7570971  | TC    | rs6759321  | 2   | 136,039,146 | 95,242   | G, T (0.31)                             | 1.18 (0.22)                | $1.39 \times 10^{-08}$  | N                            |
| <i>COBLL1</i>   | rs12328675 | HDL   | rs12328675 | 2   | 165,249,046 | 99,892   | T, C (0.13)                             | 0.68 (0.12)                | $2.72 \times 10^{-10}$  | Y                            |
|                 | rs10195252 | TG    | rs10195252 | 2   | 165,221,337 | 96,590   | T, C (0.40)                             | -2.01 (0.38)               | $1.63 \times 10^{-10}$  | N                            |
| <i>IRS1</i>     | rs2972146  | HDL   | rs1515100  | 2   | 226,837,161 | 96,875   | A, C (0.37)                             | 0.46 (0.08)                | $2.01 \times 10^{-09}$  | N                            |

|                 |            |     |            |   |             |         |             |              |                        |   |
|-----------------|------------|-----|------------|---|-------------|---------|-------------|--------------|------------------------|---|
| <i>IRS1</i>     |            | TG  | rs2943645  | 2 | 226,807,424 | 93,554  | T, C (0.37) | -1.89 (0.38) | $2.35 \times 10^{-08}$ | N |
| <i>RAF1</i>     | rs2290159  | TC  | rs2290159  | 3 | 12,603,920  | 99,434  | G, C (0.22) | -1.42 (0.23) | $4.21 \times 10^{-09}$ | N |
| <i>MSL2L1</i>   | rs645040   | TG  | rs645040   | 3 | 137,409,312 | 96,597  | T, G (0.22) | -2.22 (0.45) | $2.52 \times 10^{-08}$ | N |
| <i>KLHL8</i>    | rs442177   | TG  | rs442177   | 4 | 88,249,285  | 96,598  | T, G (0.41) | -2.25 (0.38) | $8.65 \times 10^{-12}$ | N |
| <i>SLC39A8</i>  | rs13107325 | HDL | rs13107325 | 4 | 103,407,732 | 92,059  | C, T (0.07) | -0.84 (0.16) | $7.20 \times 10^{-11}$ | N |
| <i>ARL15</i>    | rs6450176  | HDL | rs6450176  | 5 | 53,333,782  | 99,900  | G, A (0.26) | -0.49 (0.09) | $4.98 \times 10^{-08}$ | N |
| <i>MAP3K1</i>   | rs9686661  | TG  | rs9686661  | 5 | 55,897,543  | 95,848  | C, T (0.20) | 2.57 (0.49)  | $1.32 \times 10^{-10}$ | N |
| <i>HMGR</i>     | rs12916    | TC  | rs12916    | 5 | 74,692,295  | 100,184 | T, C (0.39) | 2.84 (0.20)  | $8.79 \times 10^{-47}$ | Y |
|                 |            | LDL | rs12916    | 5 | 74,692,295  | 95,454  | T, C (0.39) | 2.45 (0.18)  | $5.12 \times 10^{-45}$ | Y |
| <i>TIMD4</i>    | rs6882076  | TC  | rs6882076  | 5 | 156,322,875 | 100,184 | C, T (0.35) | -1.98 (0.20) | $7.46 \times 10^{-28}$ | N |
|                 |            | LDL | rs6882076  | 5 | 156,322,875 | 95,454  | C, T (0.35) | -1.67 (0.19) | $1.89 \times 10^{-22}$ | Y |
|                 |            | TG  | rs1553318  | 5 | 156,411,901 | 96,598  | C, G (0.36) | -2.63 (0.39) | $3.68 \times 10^{-12}$ | N |
| <i>MYLIP</i>    | rs3757354  | TC  | rs3757354  | 6 | 16,235,386  | 96,000  | C, T (0.22) | -1.46 (0.24) | $2.78 \times 10^{-09}$ | N |
|                 |            | LDL | rs3757354  | 6 | 16,235,386  | 91,293  | C, T (0.22) | -1.43 (0.21) | $1.16 \times 10^{-11}$ | N |
| <i>HFE</i>      | rs1800562  | TC  | rs1800562  | 6 | 26,201,120  | 98,550  | G, A (0.06) | -2.16 (0.43) | $2.49 \times 10^{-08}$ | N |
|                 |            | LDL | rs1800562  | 6 | 26,201,120  | 93,821  | G, A (0.06) | -2.22 (0.39) | $6.07 \times 10^{-10}$ | N |
| <i>HLA</i>      | rs3177928  | TC  | rs3177928  | 6 | 32,520,413  | 100,151 | G, A (0.16) | 2.31 (0.27)  | $3.96 \times 10^{-19}$ | N |
|                 |            | LDL | rs3177928  | 6 | 32,520,413  | 95,425  | G, A (0.16) | 1.83 (0.24)  | $2.40 \times 10^{-15}$ | N |
|                 | rs2247056  | TG  | rs2247056  | 6 | 31,373,469  | 96,598  | C, T (0.25) | -2.99 (0.42) | $1.60 \times 10^{-15}$ | Y |
| <i>C6orf106</i> | rs2814982  | TC  | rs2814982  | 6 | 34,654,538  | 100,184 | C, T (0.11) | -1.86 (0.33) | $4.68 \times 10^{-11}$ | N |
|                 | rs2814944  | HDL | rs2814944  | 6 | 34,660,775  | 99,811  | G, A (0.16) | -0.49 (0.10) | $3.81 \times 10^{-09}$ | N |
| <i>FRK</i>      | rs9488822  | TC  | rs9488822  | 6 | 116,419,586 | 100,184 | A, T (0.35) | -1.18 (0.20) | $1.69 \times 10^{-10}$ | N |
|                 |            | LDL | rs11153594 | 6 | 116,461,284 | 95,367  | C, T (0.41) | -0.89 (0.18) | $2.95 \times 10^{-9}$  | N |
| <i>CITED2</i>   | rs605066   | HDL | rs605066   | 6 | 139,871,359 | 99,900  | T, C (0.42) | -0.39 (0.08) | $2.55 \times 10^{-08}$ | N |
| <i>LPA</i>      | rs1564348  | TC  | rs1564348  | 6 | 160,498,850 | 100,168 | T, C (0.17) | 2.18 (0.27)  | $9.71 \times 10^{-17}$ | N |
|                 |            | LDL | rs1564348  | 6 | 160,498,850 | 95,439  | T, C (0.17) | 1.95 (0.24)  | $1.70 \times 10^{-17}$ | N |
|                 | rs1084651  | HDL | rs1084651  | 6 | 161,009,807 | 99,900  | G, A (0.16) | -0.56 (0.10) | $2.97 \times 10^{-08}$ | N |
| <i>DNAH11</i>   | rs12670798 | TC  | rs2285942  | 7 | 21,549,442  | 100,184 | C, T (0.15) | 1.70 (0.28)  | $6.55 \times 10^{-10}$ | N |
|                 |            | LDL | rs12670798 | 7 | 21,573,877  | 95,454  | T, C (0.23) | 1.26 (0.20)  | $6.88 \times 10^{-10}$ | Y |
| <i>NPC1L1</i>   | rs2072183  | TC  | rs2072183  | 7 | 44,545,705  | 97,063  | G, C (0.25) | 2.01 (0.29)  | $3.22 \times 10^{-11}$ | N |
|                 |            | LDL | rs217386   | 7 | 44,567,220  | 95,454  | G, A (0.43) | -1.17 (0.19) | $4.25 \times 10^{-11}$ | N |
| <i>TYWIB</i>    | rs13238203 | TG  | rs13238203 | 7 | 71,767,603  | 78,797  | C, T (0.04) | -7.91 (1.34) | $1.13 \times 10^{-09}$ | N |
| <i>MLXIPL</i>   | rs17145738 | HDL | rs17145738 | 7 | 72,620,810  | 99,898  | C, T (0.12) | 0.57 (0.12)  | $1.19 \times 10^{-09}$ | N |
|                 |            | TG  | rs7811265  | 7 | 72,572,446  | 96,598  | A, G (0.19) | -7.91 (0.50) | $9.06 \times 10^{-59}$ | Y |
| <i>KLF14</i>    | rs4731702  | HDL | rs4731702  | 7 | 130,083,924 | 99,900  | C, T (0.48) | 0.59 (0.07)  | $1.21 \times 10^{-15}$ | N |
| <i>PPP1R3B</i>  | rs9987289  | TC  | rs2126259  | 8 | 9,222,556   | 100,184 | C, T (0.10) | -3.14 (0.32) | $8.98 \times 10^{-24}$ | N |

|                       |            |     |            |    |             |         |             |               |                         |   |
|-----------------------|------------|-----|------------|----|-------------|---------|-------------|---------------|-------------------------|---|
| <i>PPPIR3B</i>        |            | LDL | rs2126259  | 8  | 9,222,556   | 95,454  | C, T (0.10) | -2.22 (0.29)  | $7.43 \times 10^{-15}$  | N |
|                       |            | HDL | rs9987289  | 8  | 9,220,768   | 99,900  | G, A (0.09) | -1.21 (0.13)  | $6.40 \times 10^{-25}$  | N |
| <i>PINX1</i>          | rs11776767 | TG  | rs11776767 | 8  | 10,721,339  | 96,598  | G, C (0.37) | 2.01 (0.39)   | $1.30 \times 10^{-08}$  | Y |
| <i>NAT2</i>           | rs1495741  | TC  | rs1961456  | 8  | 18,299,989  | 100,184 | A, G (0.32) | 1.07 (0.21)   | $1.68 \times 10^{-09}$  | N |
|                       |            | TG  | rs1495743  | 8  | 18,317,580  | 96,580  | C, G (0.22) | 2.97 (0.42)   | $4.11 \times 10^{-14}$  | N |
| <i>LPL</i>            | rs12678919 | HDL | rs12678919 | 8  | 19,888,502  | 99,900  | A, G (0.12) | 2.25 (0.12)   | $9.71 \times 10^{-98}$  | Y |
|                       |            | TG  | rs12678919 | 8  | 19,888,502  | 96,598  | A, G (0.12) | -13.64 (0.65) | $1.50 \times 10^{-115}$ | Y |
| <i>CYP7A1</i>         | rs2081687  | TC  | rs1030431  | 8  | 59,474,251  | 100,184 | G, A (0.35) | 1.26 (0.20)   | $8.79 \times 10^{-13}$  | N |
|                       |            | LDL | rs1030431  | 8  | 59,474,251  | 95,454  | G, A (0.35) | 0.95 (0.18)   | $3.86 \times 10^{-09}$  | N |
| <i>TRPS1</i>          | rs2737229  | TC  | rs2737229  | 8  | 116,717,740 | 100,184 | A, C (0.30) | -1.11 (0.21)  | $2.45 \times 10^{-08}$  | N |
|                       |            | HDL | rs2293889  | 8  | 116,668,374 | 99,900  | G, T (0.41) | -0.44 (0.08)  | $5.77 \times 10^{-11}$  | N |
| <i>TRIB1</i>          | rs2954029  | TC  | rs2954022  | 8  | 126,551,803 | 100,184 | C, A (0.46) | -2.30 (0.19)  | $5.02 \times 10^{-36}$  | Y |
|                       |            | LDL | rs2954022  | 8  | 126,551,803 | 95,454  | C, A (0.46) | -1.84 (0.17)  | $2.59 \times 10^{-29}$  | N |
|                       |            | HDL | rs10808546 | 8  | 126,565,000 | 99,900  | C, T (0.44) | 0.61 (0.07)   | $6.35 \times 10^{-19}$  | N |
|                       |            | TG  | rs2954029  | 8  | 126,560,154 | 96,598  | A, T (0.47) | -5.64 (0.39)  | $3.29 \times 10^{-55}$  | Y |
| <i>PLEC1</i>          | rs11136341 | TC  | rs11136341 | 8  | 145,115,531 | 93,052  | A, G (0.40) | 1.34 (0.24)   | $8.96 \times 10^{-10}$  | N |
|                       |            | LDL | rs11136341 | 8  | 145,115,531 | 88,376  | A, G (0.40) | 1.40 (0.21)   | $4.44 \times 10^{-13}$  | N |
| <i>TTC39B</i>         | rs581080   | TC  | rs581080   | 9  | 15,295,378  | 100,184 | C, G (0.18) | -1.57 (0.26)  | $3.08 \times 10^{-09}$  | N |
|                       |            | HDL | rs643531   | 9  | 15,286,034  | 99,889  | A, C (0.14) | -0.72 (0.10)  | $1.30 \times 10^{-13}$  | Y |
| <i>ABCA1</i>          | rs1883025  | TC  | rs1883025  | 9  | 106,704,122 | 99,463  | C, T (0.25) | -2.24 (0.24)  | $3.39 \times 10^{-27}$  | N |
|                       |            | HDL | rs1883025  | 9  | 106,704,122 | 99,179  | C, T (0.25) | -0.94 (0.09)  | $1.75 \times 10^{-33}$  | Y |
| <i>ABO</i>            | rs9411489  | TC  | rs651007   | 9  | 135,143,696 | 98,535  | C, T (0.21) | 2.30 (0.25)   | $8.66 \times 10^{-21}$  | N |
|                       |            | LDL | rs649129   | 9  | 135,144,125 | 95,454  | C, T (0.22) | 2.05 (0.21)   | $7.85 \times 10^{-22}$  | Y |
| <i>JMJD1C</i>         | rs10761731 | TG  | rs10761731 | 10 | 64,697,616  | 96,598  | A, T (0.43) | -2.38 (0.38)  | $3.48 \times 10^{-12}$  | N |
| <i>CYP26A1</i>        | rs2068888  | TG  | rs2068888  | 10 | 94,829,632  | 96,598  | G, A (0.47) | -2.28 (0.38)  | $2.38 \times 10^{-08}$  | N |
| <i>GPAM</i>           | rs2255141  | TC  | rs2255141  | 10 | 113,923,876 | 100,184 | G, A (0.30) | 1.14 (0.20)   | $2.03 \times 10^{-10}$  | N |
|                       |            | LDL | rs1129555  | 10 | 113,900,711 | 95,438  | G, A (0.29) | 1.08 (0.20)   | $2.14 \times 10^{-09}$  | N |
| <i>AMPD3</i>          | rs2923084  | HDL | rs2923084  | 11 | 10,345,358  | 99,898  | A, G (0.17) | -0.41 (0.10)  | $4.62 \times 10^{-08}$  | N |
| <i>SPTY2D1</i>        | rs10128711 | TC  | rs10832963 | 11 | 18,620,817  | 100,184 | G, T (0.29) | -1.06 (0.22)  | $2.52 \times 10^{-08}$  | N |
| <i>LRP4</i>           | rs3136441  | HDL | rs3136441  | 11 | 46,699,823  | 99,900  | T, C (0.15) | 0.78 (0.10)   | $3.48 \times 10^{-18}$  | N |
| <i>FADS1-2-3</i>      | rs174546   | TC  | rs174550   | 11 | 61,328,054  | 100,184 | T, C (0.34) | -1.78 (0.20)  | $2.08 \times 10^{-22}$  | Y |
|                       |            | LDL | rs174583   | 11 | 61,366,326  | 95,443  | C, T (0.35) | -1.71 (0.19)  | $1.17 \times 10^{-21}$  | Y |
|                       |            | HDL | rs174601   | 11 | 61,379,716  | 99,900  | C, T (0.36) | -0.73 (0.08)  | $1.50 \times 10^{-22}$  | Y |
|                       |            | TG  | rs174546   | 11 | 61,326,406  | 96,598  | C, T (0.34) | 3.82 (0.38)   | $5.41 \times 10^{-24}$  | Y |
| <i>APOA1-C3-A4-A5</i> | rs964184   | TC  | rs964184   | 11 | 116,154,127 | 100,162 | C, G (0.13) | 4.68 (0.29)   | $6.21 \times 10^{-57}$  | N |
|                       |            | LDL | rs964184   | 11 | 116,154,127 | 95,432  | C, G (0.13) | 2.85 (0.27)   | $1.47 \times 10^{-26}$  | N |

|                       |            |     |            |    |             |         |             |              |                         |   |
|-----------------------|------------|-----|------------|----|-------------|---------|-------------|--------------|-------------------------|---|
| <i>APOA1-C3-A4-A5</i> |            | HDL | rs964184   | 11 | 116,154,127 | 99,878  | C, G (0.13) | -1.50 (0.11) | $5.21 \times 10^{-47}$  | Y |
|                       |            | TG  | rs964184   | 11 | 116,154,127 | 96,576  | C, G (0.13) | 16.95 (0.48) | $6.71 \times 10^{-240}$ | Y |
| <i>UBASH3B</i>        | rs7941030  | TC  | rs7941030  | 11 | 122,027,585 | 100,184 | T, C (0.38) | 0.97 (0.19)  | $1.52 \times 10^{-10}$  | N |
|                       |            | HDL | rs7115089  | 11 | 122,035,801 | 99,900  | C, G (0.37) | 0.31 (0.08)  | $2.66 \times 10^{-08}$  | N |
| <i>ST3GAL4</i>        | rs11220462 | TC  | rs11220463 | 11 | 125,753,421 | 100,184 | A, T (0.11) | 2.01 (0.33)  | $2.12 \times 10^{-11}$  | N |
|                       |            | LDL | rs11220462 | 11 | 125,749,162 | 95,454  | G, A (0.14) | 1.95 (0.26)  | $1.20 \times 10^{-15}$  | N |
| <i>PDE3A</i>          | rs7134375  | HDL | rs7134375  | 12 | 20,365,025  | 99,900  | C, A (0.42) | 0.40 (0.08)  | $3.84 \times 10^{-08}$  | N |
| <i>LRP1</i>           | rs11613352 | HDL | rs3741414  | 12 | 56,130,316  | 99,900  | C, T (0.24) | 0.46 (0.09)  | $1.64 \times 10^{-08}$  | N |
|                       |            | TG  | rs11613352 | 12 | 56,078,847  | 96,598  | C, T (0.23) | -2.70 (0.43) | $4.43 \times 10^{-10}$  | N |
| <i>MVK</i>            | rs7134594  | HDL | rs7134594  | 12 | 108,484,576 | 99,900  | T, C (0.47) | -0.44 (0.07) | $6.88 \times 10^{-15}$  | Y |
| <i>BRAP</i>           | rs11065987 | TC  | rs11065987 | 12 | 110,556,807 | 100,184 | A, G (0.42) | -0.96 (0.20) | $6.77 \times 10^{-12}$  | N |
|                       |            | LDL | rs11065987 | 12 | 110,556,807 | 95,454  | A, G (0.42) | -0.97 (0.18) | $1.51 \times 10^{-09}$  | N |
| <i>HNFLA</i>          | rs1169288  | TC  | rs1169288  | 12 | 119,901,033 | 100,184 | A, C (0.33) | 1.45 (0.20)  | $1.48 \times 10^{-14}$  | N |
|                       |            | LDL | rs1169288  | 12 | 119,901,033 | 95,454  | A, C (0.33) | 1.42 (0.19)  | $1.13 \times 10^{-15}$  | Y |
| <i>SBNO1</i>          | rs4759375  | HDL | rs4759375  | 12 | 122,362,191 | 99,900  | C, T (0.06) | 0.86 (0.16)  | $7.50 \times 10^{-09}$  | N |
| <i>ZNF664</i>         | rs4765127  | HDL | rs4765127  | 12 | 123,026,120 | 99,787  | G, T (0.34) | 0.44 (0.08)  | $2.89 \times 10^{-10}$  | N |
|                       |            | TG  | rs12310367 | 12 | 123,052,631 | 96,598  | A, G (0.34) | -2.42 (0.41) | $1.21 \times 10^{-08}$  | Y |
| <i>SCARB1</i>         | rs838880   | HDL | rs838880   | 12 | 123,827,546 | 80,428  | T, C (0.31) | 0.61 (0.09)  | $2.58 \times 10^{-14}$  | N |
| <i>NYNRIN</i>         | rs8017377  | LDL | rs2332328  | 14 | 23,952,898  | 95,454  | C, T (0.48) | 1.17 (0.19)  | $4.41 \times 10^{-11}$  | N |
| <i>CAPN3</i>          | rs2412710  | TG  | rs2412710  | 15 | 40,471,079  | 86,707  | G, A (0.02) | 7.00 (1.49)  | $1.87 \times 10^{-08}$  | N |
| <i>FRMD5</i>          | rs2929282  | TG  | rs2929282  | 15 | 42,033,223  | 95,070  | A, T (0.05) | 5.13 (0.86)  | $1.63 \times 10^{-11}$  | N |
| <i>LIPC</i>           | rs1532085  | TC  | rs1532085  | 15 | 56,470,658  | 98,656  | G, A (0.39) | 1.54 (0.20)  | $8.83 \times 10^{-20}$  | N |
|                       |            | HDL | rs1532085  | 15 | 56,470,658  | 98,409  | G, A (0.39) | 1.45 (0.08)  | $2.92 \times 10^{-96}$  | Y |
|                       |            | TG  | rs261342   | 15 | 56,518,445  | 95,070  | C, G (0.22) | 2.99 (0.45)  | $2.42 \times 10^{-13}$  | N |
| <i>LACTB</i>          | rs2652834  | HDL | rs2652834  | 15 | 61,183,920  | 98,409  | G, A (0.20) | -0.39 (0.10) | $8.75 \times 10^{-09}$  | N |
| <i>CTF1</i>           | rs11649653 | TG  | rs11649653 | 16 | 30,825,988  | 95,034  | C, G (0.40) | -2.13 (0.39) | $3.35 \times 10^{-08}$  | N |
| <i>CETP</i>           | rs3764261  | TC  | rs3764261  | 16 | 55,550,825  | 94,472  | C, A (0.32) | 1.67 (0.23)  | $6.67 \times 10^{-14}$  | N |
|                       |            | LDL | rs247616   | 16 | 55,547,091  | 89,838  | C, T (0.32) | -1.45 (0.20) | $9.25 \times 10^{-13}$  | N |
|                       |            | HDL | rs3764261  | 16 | 55,550,825  | 94,225  | C, A (0.32) | 3.39 (0.09)  | $7.10 \times 10^{-380}$ | Y |
|                       |            | TG  | rs7205804  | 16 | 55,562,390  | 95,070  | G, A (0.45) | -2.88 (0.38) | $1.15 \times 10^{-12}$  | Y |
| <i>LCAT</i>           | rs16942887 | HDL | rs16942887 | 16 | 66,485,543  | 98,409  | G, A (0.12) | 1.27 (0.11)  | $8.39 \times 10^{-33}$  | Y |
| <i>HPR</i>            | rs2000999  | TC  | rs2000999  | 16 | 70,665,594  | 98,656  | G, A (0.20) | 2.34 (0.24)  | $3.22 \times 10^{-24}$  | N |
|                       |            | LDL | rs2000999  | 16 | 70,665,594  | 93,999  | G, A (0.20) | 2.00 (0.22)  | $1.75 \times 10^{-22}$  | N |
| <i>CMIP</i>           | rs2925979  | HDL | rs2925979  | 16 | 80,092,291  | 98,409  | C, T (0.30) | -0.45 (0.08) | $2.09 \times 10^{-11}$  | N |
| <i>STARD3</i>         | rs11869286 | HDL | rs881844   | 17 | 35,063,744  | 98,409  | G, C (0.34) | -0.51 (0.08) | $2.84 \times 10^{-14}$  | N |
| <i>OSBPL7</i>         | rs7206971  | TC  | rs7206971  | 17 | 42,780,114  | 90,614  | G, A (0.49) | 1.01 (0.20)  | $1.05 \times 10^{-08}$  | N |

|                   |            |     |            |    |            |        |             |              |                         |   |
|-------------------|------------|-----|------------|----|------------|--------|-------------|--------------|-------------------------|---|
| <i>OSBPL7</i>     |            | LDL | rs7225700  | 17 | 42,746,803 | 93,999 | C, T (0.35) | -0.87 (0.18) | $3.92 \times 10^{-09}$  | N |
| <i>ABCA8</i>      | rs4148008  | HDL | rs4148008  | 17 | 64,386,889 | 98,409 | C, G (0.32) | -0.42 (0.08) | $1.79 \times 10^{-10}$  | N |
| <i>PGS1</i>       | rs4129767  | HDL | rs4082919  | 17 | 73,889,077 | 98,409 | T, G (0.48) | -0.40 (0.08) | $4.98 \times 10^{-09}$  | N |
| <i>LIPG</i>       | rs7241918  | TC  | rs7239867  | 18 | 45,418,715 | 98,656 | G, A (0.17) | -1.94 (0.26) | $2.03 \times 10^{-19}$  | N |
|                   |            | HDL | rs7241918  | 18 | 45,414,951 | 98,409 | T, G (0.17) | -1.31 (0.10) | $2.73 \times 10^{-49}$  | Y |
| <i>MC4R</i>       | rs12967135 | HDL | rs12967135 | 18 | 56,000,003 | 98,409 | G, A (0.23) | -0.42 (0.09) | $6.58 \times 10^{-09}$  | N |
| <i>ANGPTL4</i>    | rs7255436  | HDL | rs7255436  | 19 | 8,339,196  | 98,409 | A, C (0.47) | -0.45 (0.08) | $3.25 \times 10^{-08}$  | Y |
| <i>LDLR</i>       | rs6511720  | TC  | rs6511720  | 19 | 11,063,306 | 97,764 | G, T (0.11) | -7.09 (0.34) | $6.65 \times 10^{-97}$  | Y |
|                   |            | LDL | rs6511720  | 19 | 11,063,306 | 93,131 | G, T (0.11) | -6.99 (0.30) | $4.28 \times 10^{-117}$ | Y |
| <i>LOC55908</i>   | rs737337   | HDL | rs737337   | 19 | 11,208,493 | 98,409 | T, C (0.08) | -0.64 (0.14) | $3.10 \times 10^{-09}$  | N |
| <i>CILP2</i>      | rs10401969 | TC  | rs10401969 | 19 | 19,268,718 | 98,640 | T, C (0.07) | -4.74 (0.42) | $2.90 \times 10^{-38}$  | Y |
|                   |            | LDL | rs10401969 | 19 | 19,268,718 | 93,983 | T, C (0.07) | -3.11 (0.38) | $6.69 \times 10^{-22}$  | Y |
|                   |            | TG  | rs10401969 | 19 | 19,268,718 | 95,054 | T, C (0.07) | -7.83 (0.82) | $1.61 \times 10^{-29}$  | Y |
| <i>APOE-C1-C2</i> | rs4420638  | TC  | rs4420638  | 19 | 50,114,786 | 87,766 | A, G (0.17) | 6.83 (0.32)  | $5.20 \times 10^{-111}$ | Y |
|                   |            | LDL | rs4420638  | 19 | 50,114,786 | 83,209 | A, G (0.17) | 7.14 (0.29)  | $8.72 \times 10^{-147}$ | Y |
|                   |            | HDL | rs4420638  | 19 | 50,114,786 | 87,520 | A, G (0.17) | -1.06 (0.12) | $4.40 \times 10^{-21}$  | Y |
|                   | rs439401   | TG  | rs439401   | 19 | 50,106,291 | 65,871 | C, T (0.36) | -5.50 (0.44) | $1.14 \times 10^{-30}$  | Y |
| <i>FLJ36070</i>   | rs492602   | TC  | rs492602   | 19 | 53,898,229 | 97,148 | A, G (0.49) | 1.27 (0.21)  | $2.01 \times 10^{-10}$  | N |
| <i>LILRA3</i>     | rs386000   | HDL | rs386000   | 19 | 59,484,573 | 86,430 | G, C (0.20) | 0.83 (0.11)  | $4.29 \times 10^{-16}$  | N |
| <i>ERGIC3</i>     | rs2277862  | TC  | rs2277862  | 20 | 33,616,196 | 98,656 | C, T (0.15) | -1.19 (0.27) | $3.82 \times 10^{-10}$  | N |
| <i>MAFB</i>       | rs2902940  | TC  | rs2902940  | 20 | 38,524,901 | 98,656 | A, G (0.29) | -1.38 (0.21) | $6.08 \times 10^{-11}$  | N |
|                   |            | LDL | rs2902941  | 20 | 38,524,928 | 93,999 | A, G (0.33) | -0.98 (0.19) | $1.11 \times 10^{-08}$  | Y |
| <i>TOP1</i>       | rs6029526  | TC  | rs4297946  | 20 | 39,244,689 | 98,588 | G, C (0.47) | 1.52 (0.19)  | $2.76 \times 10^{-17}$  | N |
|                   |            | LDL | rs909802   | 20 | 39,370,229 | 93,999 | C, T (0.47) | 1.41 (0.17)  | $3.18 \times 10^{-19}$  | N |
| <i>HNF4A</i>      | rs1800961  | TC  | rs1800961  | 20 | 42,475,778 | 70,383 | C, T (0.03) | -4.73 (0.66) | $5.72 \times 10^{-13}$  | N |
|                   |            | HDL | rs1800961  | 20 | 42,475,778 | 71,749 | C, T (0.03) | -1.88 (0.24) | $1.05 \times 10^{-15}$  | Y |
| <i>PLTP</i>       | rs6065906  | HDL | rs6065906  | 20 | 43,987,422 | 98,409 | T, C (0.18) | -0.93 (0.10) | $1.90 \times 10^{-22}$  | Y |
|                   |            | TG  | rs4810479  | 20 | 43,978,455 | 95,070 | T, C (0.24) | 3.32 (0.42)  | $4.69 \times 10^{-18}$  | Y |
| <i>UBE2L3</i>     | rs181362   | HDL | rs181362   | 22 | 20,262,068 | 96,905 | C, T (0.20) | -0.46 (0.09) | $1.11 \times 10^{-08}$  | N |
| <i>PLA2G6</i>     | rs5756931  | TG  | rs5756931  | 22 | 36,875,979 | 95,067 | T, C (0.40) | -1.54 (0.38) | $3.82 \times 10^{-08}$  | N |

\* When possible, plausible biological candidate genes have been listed; otherwise, the nearest gene(s) is indicated.

† Positions are relative to Human Genome NCBI Build 36, except for rs9411489, which is Build 35.

‡ Alleles are designated with respect to the “+” strand.

§ Effect sizes for HDL, LDL, and total cholesterol were estimated directly. Effect sizes for triglycerides were estimated as percent changes due to a single copy of the minor allele; effect in mg/dL was determined at mean triglyceride level 137.9 mg/dL.

**Supplementary Table 3.** SNP genotyping platforms, imputation details, and association testing methods.

| Study                                                                        | Genotyping platform(s)                      | Imputation method | NCBI Build | Study-specific covariates               | Association testing method                             |
|------------------------------------------------------------------------------|---------------------------------------------|-------------------|------------|-----------------------------------------|--------------------------------------------------------|
| Age, Gene/Environment Susceptibility Reykjavik Study                         | Illumina 370K                               | MACH 1.0.16       | 36         |                                         | ProbABEL 0.0.5c                                        |
| Atherosclerosis Risk in Communities Study                                    | Affymetrix 1M                               | MACH 1.0          | 35         | PCs                                     | MACH2QTL                                               |
| Australian Twin Cohort                                                       | Illumina 318K                               | MACH 1.0.10       | 36         | None, but samples excluded based on PCs | PLINK 1.04                                             |
| Baltimore Longitudinal Study of Aging                                        | Illumina 550K                               | MACH 1.0          | 35         | PCs                                     | MERLIN                                                 |
| British 1958 Birth Cohort T1D Controls                                       | Illumina 550K                               | MACH              | 35         |                                         | ProbABEL 0.0.5b                                        |
| British 1958 Birth Cohort – Wellcome Trust Case Control Consortium           | Affymetrix 500K                             | IMPUTE 0.2.0      | 35         | None, but samples excluded based on PCs | SNPTEST 1.1.3                                          |
| British Genetics of Hypertension Study                                       | Affymetrix 500K                             | IMPUTE            | 35         | None, but samples excluded based on PCs | QUICKTEST 0.94                                         |
| Cardiovascular Health Study                                                  | Illumina 370CNV                             | BIMBAM 0.99       | 36         | Study site                              | R                                                      |
| The Cohorte Lausannoise Study                                                | Affymetrix 500K                             | IMPUTE 0.3.0      | 35         | PCs                                     | QUICKTEST 0.9                                          |
| KORA - Cooperative Health Research in the Region of Augsburg                 | Affymetrix 500K                             | MACH              | 35         |                                         | MACH2QTL                                               |
| Danish Twins Registry                                                        | Illumina 318K                               | MACH 1.0.10       | 36         | None, but samples excluded based on PCs | PLINK 1.04                                             |
| Diabetes Genetics Initiative T2D Cases and Controls*                         | Affymetrix 500K                             | MACH 1.0          | 35         | Study site                              | MACH2QTL                                               |
| Dutch National Twin Cohort                                                   | Illumina 318K                               | MACH 1.0.10       | 36         | None, but samples excluded based on PCs | PLINK 1.04                                             |
| EPIC-Norfolk Obese Cases                                                     | Affymetrix 500K                             | IMPUTE 0.3.1      | 35         |                                         | SNPTEST 1.1.5                                          |
| EPIC-Norfolk Subcohort                                                       | Affymetrix 500K                             | IMPUTE 0.3.1      | 35         |                                         | SNPTEST 1.1.5                                          |
| Erasmus Rucphen Family Study                                                 | Illumina 300K, 370K;<br>Affymetrix Nsp 250K | MACH 1.0.15       | 36         |                                         | ProbABEL                                               |
| Family Heart Study CHD Cases and Controls                                    | Illumina 550K                               | MACH 1.0.15       | 36         | Field center and PCs                    | Mixed model regression to account for family structure |
| Fenland Study                                                                | Affymetrix 500K                             | IMPUTE 0.4.2      | 35         |                                         | SNPTEST 1.1.5                                          |
| Finnish National Twin Cohort                                                 | Illumina 318K                               | MACH 1.0.10       | 36         | None, but samples excluded based on PCs | PLINK 1.04                                             |
| Framingham Heart Study                                                       | Affymetrix 500K;<br>MIPS 50K                | MACH 1.0          | 36         | PCs                                     | GWAF (R package) linear mixed effects model            |
| Finland-United States Investigation of NIDDM Genetics T2D Cases and Controls | Illumina 317K                               | MACH              | 35         | Birth province                          | R                                                      |

|                                                             |                                           |              |    |                                         |               |
|-------------------------------------------------------------|-------------------------------------------|--------------|----|-----------------------------------------|---------------|
| Health2000 GenMets MS Cases and Controls                    | Illumina 610K                             | MACH 1.0.10  | 36 | None, but samples excluded based on PCs | ProbABEL      |
| Invecchiare in Chianti Study*                               | Illumina 550K                             | MACH 1.0     | 35 |                                         | MERLIN        |
| London Life Sciences Population Study                       | Affymetrix 500K;<br>Perlegen custom array | MACH         | 35 | PCs                                     | MACH2QTL      |
| MedSTAR MI Cases and Controls                               | Affymetrix 1M                             | MACH 1.0     | 36 | PCs                                     | SNPTEST 1.1.5 |
| MICROS Study of Population Microisolates in South Tyrol     | Illumina 300K                             | MACH 1.0.15  | 36 |                                         | ProbABEL      |
| National FINRISK Study                                      | Illumina 610K                             | MACH 1.0.10  | 36 | None, but samples excluded based on PCs | ProbABEL      |
| Northern Finland Birth Cohort 1966                          | Illumina 370K                             | MACH 1.0.10  | 36 | None, but samples excluded based on PCs | PLINK 1.04    |
| Northern Swedish Population Health Study                    | Illumina 300K                             | MACH 1.0.15  | 36 |                                         | ProbABEL      |
| Orkney Complex Disease Study                                | Illumina 300K                             | MACH 1.0.15  | 36 |                                         | ProbABEL      |
| PennCATH MI Cases and Controls                              | Affymetrix 1M                             | MACH 1.0     | 36 | PCs                                     | SNPTEST 1.1.5 |
| Pharmacogenomics and Risk of Cardiovascular Disease Study   | Illumina 317K; Illumina 610K              | BIMBAM 0.9.5 | 36 | Study site                              | SNPTEST 1.1.5 |
| Rotterdam Study Baseline                                    | Illumina 550K                             | MACH 1.0.15  | 36 |                                         | ProbABEL      |
| Rotterdam Study Extension of Baseline                       | Illumina 550K                             | MACH 1.0.15  | 36 |                                         | ProbABEL      |
| SardiNIA Study of Aging                                     | Affymetrix 500K                           | MACH         | 35 |                                         |               |
| Twins UK                                                    | Illumina 318K                             | MACH 1.0.10  | 36 | None, but samples excluded based on PCs | PLINK 1.04    |
| Supplementation en Vitamines et Mineraux Antioxydants Study | Illumina 317K                             | MACH         | 35 |                                         |               |
| Swedish National Twin Cohort                                | Illumina 318K                             | MACH 1.0.10  | 36 | None, but samples excluded based on PCs | PLINK 1.04    |
| Vis Study                                                   | Illumina 300K                             | MACH 1.0.15  | 36 |                                         | ProbABEL      |
| Women's Genome Health Study                                 | Illumina 300K Duo "+"                     | MACH 1.0.16  | 35 | Eigenvectors (EIGENSTRAT)               | MACH2QTL      |

PCs = principal components.

\* Contained a small number of related individuals.

**Supplementary Table 4.** Genomic control inflation factors.

| Study                                                                         | HDL   | LDL   | TG    | TC    |
|-------------------------------------------------------------------------------|-------|-------|-------|-------|
| Age, Gene/Environment Susceptibility Reykjavik Study                          | 1.077 | 1.045 | 1.049 | 1.052 |
| Atherosclerosis Risk in Communities Study                                     | 1.013 | 1.025 | 1.042 | 1.026 |
| Baltimore Longitudinal Study of Aging                                         | 1.013 | 1.016 | 1.057 | 1.044 |
| British 1958 Birth Cohort – Wellcome Trust Case Control Consortium            | 1.004 | 1.004 | 1.006 | 1.004 |
| British 1958 Birth Cohort T1D Controls                                        | 1.021 | 1.02  | 1.01  | 1.014 |
| British Genetics of Hypertension Study                                        | 0.991 | 1.013 | 1.007 | 1     |
| Cardiovascular Health Study                                                   | 1.038 | 1.021 | 1.023 | 1.023 |
| The Cohorte Lausannoise Study                                                 | 1.016 | 0.996 | 1.038 | 0.999 |
| KORA - Cooperative Health Research in the Region of Augsburg                  | 1.01  | 1.007 | 1.004 | 1.012 |
| Diabetes Genetics Initiative T2D Cases and Controls*†                         | 1.477 | 1.266 | 1.077 | 1.134 |
| ENGAGE‡                                                                       | 1.046 | 1.043 | 1.031 | 0.989 |
| EPIC-Norfolk Obese Cases                                                      | 1.009 | 1.003 | 1.007 | 1.009 |
| EPIC-Norfolk Subcohort                                                        | 1.008 | 1.013 | 1.021 | 1.005 |
| Family Heart Study CHD Cases and Controls                                     | 1.113 | 1.074 | 1.082 | 1.084 |
| Fenland Study                                                                 | 1.024 | 1.016 | 1.015 | 1.034 |
| Framingham Heart Study                                                        | 1.022 | 1.02  | 1.03  | 1.031 |
| Finland-United States Investigation of NIDDM Genetics T2D Cases and Controls* | 1.006 | 1.016 | 1.007 | 1.016 |
| Invecchiare in Chianti Study†                                                 | 1     | 1.015 | 1.021 | 1.014 |
| London Life Sciences Population Study                                         | 1.018 | 1.008 | 1.011 | 1.009 |
| MedSTAR MI Cases and Controls*                                                | 1.037 | 1.024 | 1.015 | 1.015 |
| PennCATH MI Cases and Controls*                                               | 1.004 | 1.007 | 1.024 | 1     |
| Pharmacogenomics and Risk of Cardiovascular Disease Study                     | 1.008 | 1.013 | 1.016 | 1.001 |
| SardiNIA Study of Aging                                                       | 1.119 | 1.133 | 1.129 | 1.147 |
| Supplementation en Vitamines et Mineraux Antioxydants Study                   | 1     | 1     | 1     | 1.047 |
| Women's Genome Health Study                                                   | 1.064 | 1.034 | 1.084 | 1.040 |
| Overall meta-analysis                                                         | 1.14  | 1.097 | 1.121 | 1.105 |

\* The cohort's case and control sets were meta-analysed and genomic control correction was applied before the combined cohort was meta-analysed with the remaining studies.

† The DGI and InCHIANTI studies each included a small number of related individuals.

‡ Meta-analysis of: Australian Twin Cohort, Danish Twins Registry, Dutch National Twin Cohort, Erasmus Rucphen Family Study, Finnish National Twin Cohort, Health2000 GenMets MS, MICROS Study of Population Microisolates in South Tyrol, National FINRISK Study, Northern Finland Birth Cohort 1966, Northern Swedish Population Health Study, Orkney Complex Disease Study, Rotterdam Study Baseline, Rotterdam Study Extension of Baseline, TwinsUK, Swedish National Twin Cohort, Vis Study.

**Supplementary Table 5.** Evidence of association for best proxies directly genotyped on Affymetrix and Illumina arrays.

| Lead SNP   | Trait | Best SNP   | <i>n</i> | <i>P</i> -value | Proxy Illumina SNP* |                       |                 |   |   |   |   | Proxy Affymetrix SNP*  |            |                       |                 |   |   |                        |
|------------|-------|------------|----------|-----------------|---------------------|-----------------------|-----------------|---|---|---|---|------------------------|------------|-----------------------|-----------------|---|---|------------------------|
|            |       |            |          |                 | SNP                 | <i>r</i> <sup>2</sup> | <i>P</i> -value | A | B | C | D | Approx. typed <i>n</i> | SNP        | <i>r</i> <sup>2</sup> | <i>P</i> -value | E | F | Approx. typed <i>n</i> |
| rs12027135 | LDL   | rs12027135 | 95,454   | 1E-10           | rs10903129          | 1.00                  | 2E-10           | Y | Y | Y | Y | 59,333                 | rs11802413 | 1.00                  | 2E-10           | Y | Y | 41,912                 |
| rs12027135 | TC    | rs12027135 | 100,184  | 4E-11           | rs10903129          | 1.00                  | 7E-11           | Y | Y | Y | Y | 59,333                 | rs11802413 | 1.00                  | 5E-11           | Y | Y | 41,912                 |
| rs4660293  | HDL   | rs4660293  | 99,855   | 4E-10           | rs4660293           | 1.00                  | 4E-10           | Y | Y | Y | Y | 59,333                 | rs4660293  | 1.00                  | 4E-10           | Y | Y | 41,912                 |
| rs2479409  | LDL   | rs2479409  | 95,435   | 2E-28           |                     |                       |                 |   |   |   |   |                        | rs2479409  | 1.00                  | 2E-28           | Y | Y | 41,912                 |
| rs2479409  | TC    | rs2479409  | 100,164  | 4E-24           |                     |                       |                 |   |   |   |   |                        | rs2479409  | 1.00                  | 4E-24           | Y | Y | 41,912                 |
| rs2131925  | LDL   | rs3850634  | 92,503   | 3E-18           | rs10889353          | 1.00                  | 2E-17           | Y | Y | Y | Y | 59,333                 | rs995000   | 1.00                  | 5E-17           | Y | Y | 41,912                 |
| rs2131925  | TC    | rs3850634  | 9        |                 |                     |                       |                 |   |   |   |   |                        |            |                       |                 |   |   |                        |

|            |     |            |         |       |            |      |       |   |   |   |   |        |            |      |       |   |   |        |
|------------|-----|------------|---------|-------|------------|------|-------|---|---|---|---|--------|------------|------|-------|---|---|--------|
| rs2290159  | TC  | rs2290159  | 99,434  | 4E-9  | rs11128607 | 0.86 | 1E-8  | Y | Y | Y | Y | 59,333 | rs7956     | 1.00 | 4E-8  | Y | Y | 41,912 |
| rs645040   | TG  | rs645040   | 96,597  | 3E-8  | rs684773   | 1.00 | 1E-7  | Y | Y | Y | Y | 59,333 | rs684773   | 1.00 | 1E-7  | Y | Y | 41,912 |
| rs442177   | TG  | rs442177   | 96,598  | 9E-12 | rs236996   | 0.96 | 2E-10 | Y | Y | Y | Y | 59,333 | rs3775214  | 0.96 | 4E-11 | Y | Y | 41,912 |
| rs13107325 | HDL | rs13107325 | 92,059  | 7E-11 | rs13107325 | 1.00 | 7E-11 | Y | Y | Y | Y | 59,333 | rs13107325 | 1.00 | 7E-11 | Y |   | 10,296 |
| rs6450176  | HDL | rs6450176  | 99,900  | 5E-8  | rs4311394  | 0.91 | 1E-7  | Y | Y | Y | Y | 59,333 | rs6886510  | 0.91 | 2E-7  | Y | Y | 41,912 |
| rs9686661  | TG  | rs9686661  | 95,848  | 1E-10 | rs3843467  | 1.00 | 1E-9  | Y | Y | Y | Y | 59,333 | rs3843467  | 1.00 | 1E-9  | Y | Y | 41,912 |
| rs12916    | LDL | rs12916    | 95,454  | 5E-45 | rs3846662  | 0.84 | 2E-35 | Y | Y | Y | Y | 59,333 | rs3846663  | 0.97 | 2E-42 | Y | Y | 41,912 |
| rs12916    | TC  | rs12916    | 100,184 | 9E-47 | rs3846662  | 0.84 | 1E-37 | Y | Y | Y | Y | 59,333 | rs3846663  | 0.97 | 3E-43 | Y | Y | 41,912 |
| rs6882076  | LDL | rs6882076  | 95,454  | 2E-22 | rs1363232  | 0.96 | 4E-19 | Y | Y | Y | Y |        |            |      |       |   |   |        |

|            |     |            |         |        |            |      |       |   |   |   |   |        |            |      |        |   |        |
|------------|-----|------------|---------|--------|------------|------|-------|---|---|---|---|--------|------------|------|--------|---|--------|
| rs9987289  | TC  | rs2126259  | 100,184 | 9E-24  | rs2126259  | 1.00 | 9E-24 | Y | Y | Y | Y | 59,333 | rs1461729  | 1.00 | 8E-20  | Y | 10,296 |
| rs11776767 | TG  | rs11776767 | 96,598  | 1E-8   | rs6992366  | 0.87 | 1E-5  | Y | Y | Y | Y | 59,333 | rs2278335  | 0.80 | 2E-5   | Y | 41,912 |
| rs1495741  | TC  | rs1961456  | 100,184 | 2E-9   |            |      |       |   |   |   |   |        |            |      |        |   |        |
| rs1495741  | TG  | rs1495743  | 96,580  | 4E-14  | rs1495741  | 1.00 | 5E-14 | Y | Y | Y | Y | 59,333 | rs1495743  | 1.00 | 4E-14  | Y | 41,912 |
| rs12678919 | HDL | rs12678919 | 99,900  | 1E-97  | rs10096633 | 0.86 | 1E-83 | Y | Y | Y | Y | 59,333 | rs10503669 | 0.93 | 5E-92  | Y | 41,912 |
| rs12678919 | TG  | rs12678919 | 96,598  | 2E-115 | rs10096633 | 0.86 | 1E-97 | Y | Y | Y | Y | 59,333 | rs10503669 | 0.93 | 2E-108 | Y | 41,912 |
| rs2081687  | LDL | rs1030431  | 95,454  | 4E-9   | rs4738679  | 0.93 | 1E-8  | Y | Y | Y | Y | 59,333 | rs13277801 | 1.00 | 7E-9   | Y | 41,912 |
| rs2081687  | TC  | rs1030431  | 100,184 | 9E-13  | rs4738679  | 0.93 | 3E-12 | Y | Y | Y | Y | 59,333 | rs13277801 | 1.00 | 2E-12  | Y | 41,912 |
| rs2293889  | HDL | rs2293889  | 99,900  | 6E-11  | rs3808439  | 0.93 | 4E-9  | Y | Y | Y | Y | 59,333 | rs3808461  | 0.96 | 1E-10  | Y | 41,912 |
| rs2737229  | TC  | rs2737229  | 100,184 | 2E-8   | rs2737229  | 1.00 | 2E-8  |   |   |   |   |        |            |      |        |   |        |

|            |     |            |         |        |            |      |        |   |   |       |          |        |            |      |        |   |   |        |
|------------|-----|------------|---------|--------|------------|------|--------|---|---|-------|----------|--------|------------|------|--------|---|---|--------|
| rs964184   | TG  | rs964184   | 96,576  | 7E-240 | rs964184   | 1.00 | 7E-240 |   | Y | 4,608 | rs964184 | 1.00   | 7E-240     | Y    | 10,296 |   |   |        |
| rs7941030  | HDL | rs7115089  | 99,900  | 3E-8   | rs7941030  | 0.87 | 3E-8   | Y | Y | Y     | Y        | 59,333 | rs10892873 | 1.00 | 4E-8   | Y | Y | 41,912 |
| rs7941030  | TC  | rs7941030  | 100,184 | 2E-10  | rs7941030  | 1.00 | 2E-10  | Y | Y | Y     | Y        | 59,333 | rs7123220  | 0.90 | 5E-10  | Y | Y | 41,912 |
| rs11220462 | LDL | rs11220462 | 95,454  | 1E-15  | rs7940893  | 1.00 | 2E-14  | Y | Y | Y     | Y        | 59,333 |            |      |        |   |   |        |
| rs11220462 | TC  | rs11220463 | 100,184 | 2E-11  |            |      |        |   |   |       |          |        |            |      |        |   |   |        |
| rs7134375  | HDL | rs7134375  | 99,900  | 4E-8   | rs7134375  | 1.00 | 4E-8   | Y | Y | Y     | Y        | 59,333 |            |      |        |   |   |        |
| rs11613352 | HDL | rs3741414  | 99,900  | 2E-8   | rs3741414  | 1.00 | 2E-8   |   |   | Y     | Y        | 17,068 | rs11614506 | 0.84 | 1E-7   | Y | Y | 41,912 |
| rs11613352 | TG  | rs11613352 | 96,598  | 4E-10  | rs11172147 | 1.00 | 1E-9   |   |   | Y     | Y        | 17,068 | rs11614506 | 1.00 | 2E-9   | Y | Y | 41,912 |
| rs7134594  | HDL | rs7134594  | 99,900  | 7E-15  | rs7134594  | 1.00 | 7E-15  | Y | Y | Y     | Y        | 59,333 | rs10161126 | 1.00 | 8E-13  | Y | Y | 41,912 |
| rs11065987 | LDL | rs11065987 | 95,454  | 2E-9   | rs11065987 | 1.00 | 2E-9   |   |   | Y     | Y        | 17,068 |            |      |        |   |   |        |
| rs11065987 | TC  | rs11065987 | 100,184 | 7E-12  | rs11065987 | 1.00 | 7E-12  |   |   | Y     | Y        | 17,068 |            |      |        |   |   |        |
| rs1169288  | LDL | rs1169288  | 95,454  | 1E-15  | rs2650000  | 0.92 | 3E-14  | Y | Y | Y     | Y        | 59,333 | rs2650000  | 0.92 | 3E-14  |   | Y | 10,296 |
| rs1169288  | TC  | rs1169288  | 100,184 | 1E-14  | rs2650000  | 0.92 | 5E-14  | Y | Y | Y     | Y        | 59,333 | rs2650000  | 0.92 | 5E-14  |   | Y | 10,296 |
| rs4759375  | HDL | rs4759375  | 99,900  | 8E-9   |            |      |        |   |   |       |          |        |            |      |        |   |   |        |
| rs4765127  | HDL | rs4765127  | 99,787  | 3E-10  | rs12298484 | 0.97 | 1E-9   | Y | Y | Y     | Y        | 59,333 | rs1187415  | 1.00 | 1E-9   | Y | Y | 41,912 |
| rs4765127  | TG  | rs12310367 | 96,598  | 1E-8   | rs12298484 | 0.97 | 8E-8   | Y | Y | Y     | Y        | 59,333 | rs1187415  | 1.00 | 2E-8   | Y | Y | 41,912 |
| rs838880   | HDL | rs838880   | 80,428  | 3E-14  | rs838878   | 0.96 | 6E-14  | Y | Y | Y     | Y        | 59,333 | rs838880   | 1.00 | 3E-14  |   | Y | 10,296 |
| rs8017377  | LDL | rs2332328  | 95,454  | 4E-11  | rs8017377  | 1.00 | 5E-11  | Y | Y | Y     | Y        | 59,333 |            |      |        |   |   |        |
| rs2412710  | TG  | rs2412710  | 86,707  | 2E-8   |            |      |        |   |   |       |          |        |            |      |        |   |   |        |
| rs2929282  | TG  | rs2929282  | 95,070  | 2E-11  | rs2929275  | 1.00 | 3E-11  |   |   | Y     | Y        | 17,068 | rs2918952  | 1.00 | 9E-11  | Y | Y | 41,912 |
| rs1532085  | HDL | rs1532085  | 98,409  | 3E-96  | rs1532085  | 1.00 | 3E-96  | Y | Y | Y     | Y        | 59,333 |            |      |        |   |   |        |
| rs1532085  | TC  | rs1532085  | 98,656  | 9E-20  | rs1532085  | 1.00 | 9E-20  | Y | Y | Y     | Y        | 59,333 |            |      |        |   |   |        |
| rs1532085  | TG  | rs261342   | 95,070  | 2E-13  | rs261341   | 0.85 | 4E-8   | Y | Y | Y     | Y        | 59,333 | rs261332   | 0.88 | 5E-12  | Y | Y | 41,912 |
| rs2652834  | HDL | rs2652834  | 98,409  | 9E-9   |            |      |        |   |   |       |          |        |            |      |        |   |   |        |
| rs11649653 | TG  | rs11649653 | 95,034  | 3E-8   |            |      |        |   |   |       |          |        | rs11649653 | 1.00 | 3E-8   | Y | Y | 41,912 |
| rs3764261  | HDL | rs3764261  | 94,225  | 7E-380 | rs3764261  | 1.00 | 7E-380 | Y | Y | Y     | Y        | 59,333 |            |      |        |   |   |        |
| rs3764261  | LDL | rs247616   | 89,838  | 9E-13  | rs3764261  | 1.00 | 2E-12  | Y | Y | Y     | Y        | 59,333 |            |      |        |   |   |        |
| rs3764261  | TC  | rs3764261  | 94,472  | 7E-14  | rs3764261  | 1.00 | 7E-14  | Y | Y | Y     | Y        | 59,333 |            |      |        |   |   |        |
| rs3764261  | TG  | rs7205804  | 95,070  | 1E-12  | rs1532624  | 1.00 | 1E-12  | Y | Y | Y     | Y        | 59,333 |            |      |        |   |   |        |
| rs16942887 | HDL | rs16942887 | 98,409  | 8E-33  | rs2271293  | 1.00 | 5E-32  | Y | Y | Y     | Y        | 59,333 | rs2292316  | 1.00 | 2E-32  | Y | Y | 41,912 |
| rs2000999  | LDL | rs2000999  | 93,999  | 2E-22  | rs2000999  | 1.00 | 2E-22  | Y | Y | Y     | Y        | 59,333 |            |      |        |   |   |        |
| rs2000999  | TC  | rs2000999  | 98,656  | 3E-24  | rs2000999  | 1.00 | 3E-24  | Y | Y | Y     | Y        | 59,333 |            |      |        |   |   |        |
| rs2925979  | HDL | rs2925979  | 98,409  | 2E-11  | rs2925979  | 1.00 | 2E-11  | Y | Y | Y     | Y        | 59,333 |            |      |        |   |   |        |
| rs11869286 | HDL | rs881844   | 98,409  | 3E-14  | rs931992   | 1.00 | 9E-14  | Y | Y | Y     | Y        | 59,333 | rs11869286 | 1.00 | 1E-13  | Y | Y | 41,912 |
| rs7206971  | LDL | rs7225700  | 93,999  | 4E-9   | rs6504833  | 1.00 | 6E-9   | Y | Y | Y     | Y        | 59,333 | rs11650072 | 1.00 | 1E-8   |   | Y | 10,296 |
| rs7206971  | TC  | rs7206971  | 90,614  | 1E-8   | rs11079784 | 0.94 | 9E-7   | Y | Y | Y     | Y        | 59,333 | rs7206971  | 1.00 | 1E-8   | Y | Y | 41,912 |

|            |     |            |        |        |            |      |        |   |   |   |   |        |            |      |       |   |   |        |
|------------|-----|------------|--------|--------|------------|------|--------|---|---|---|---|--------|------------|------|-------|---|---|--------|
| rs4148008  | HDL | rs4148008  | 98,409 | 2E-10  | rs4148005  | 1.00 | 2E-10  | Y | Y | Y | Y | 59,333 | rs1373068  | 0.92 | 4E-10 | Y | Y | 41,912 |
| rs4129767  | HDL | rs4082919  | 98,409 | 5E-9   | rs4129767  | 0.97 | 8E-9   | Y | Y | Y | Y | 59,333 | rs4969183  | 0.94 | 1E-8  | Y | Y | 41,912 |
| rs7241918  | HDL | rs7241918  | 98,409 | 3E-49  | rs4939883  | 1.00 | 4E-49  | Y | Y | Y | Y | 59,333 | rs4939883  | 1.00 | 4E-49 | Y | Y | 41,912 |
| rs7241918  | TC  | rs7239867  | 98,656 | 2E-19  | rs4939883  | 1.00 | 5E-19  | Y | Y | Y | Y | 59,333 | rs4939883  | 1.00 | 5E-19 | Y | Y | 41,912 |
| rs12967135 | HDL | rs12967135 | 98,409 | 7E-9   | rs12970134 | 0.81 | 1E-5   | Y | Y | Y | Y | 59,333 | rs17782313 | 1.00 | 1E-8  | Y | Y | 41,912 |
| rs7255436  | HDL | rs7255436  | 98,409 | 3E-8   | rs2278236  | 1.00 | 4E-8   | Y | Y | Y | Y | 59,333 | rs7254882  | 1.00 | 2E-7  | Y |   | 10,296 |
| rs6511720  | LDL | rs6511720  | 93,131 | 4E-117 | rs6511720  | 1.00 | 4E-117 |   |   | Y | Y | 17,068 |            |      |       |   |   |        |
| rs6511720  | TC  | rs6511720  | 97,764 | 7E-97  | rs6511720  | 1.00 | 7E-97  |   |   | Y | Y | 17,068 |            |      |       |   |   |        |
| rs737337   | HDL | rs737337   | 98,409 | 3E-9   | rs737337   | 1.00 | 3E-9   | Y | Y | Y | Y | 59,333 |            |      |       |   |   |        |
| rs10401969 |     |            |        |        |            |      |        |   |   |   |   |        |            |      |       |   |   |        |

**Supplementary Table 6.** Genome-wide significant SNPs after conditioning upon lead SNPs from primary GWAS analysis.

| Locus                 | SNP        | Trait | Chr | Position*   | <i>n</i> | Allele 1,<br>Allele 2† | <i>P</i> -value           | Effect | Conditioned<br>SNP in locus | D' ‡  | <i>r</i> <sup>2</sup> ‡ |
|-----------------------|------------|-------|-----|-------------|----------|------------------------|---------------------------|--------|-----------------------------|-------|-------------------------|
| <i>PABPC4</i>         | rs4660808  | TG    | 1   | 39,791,096  | 90,819   | T, C                   | 2.96 x 10 <sup>-08</sup>  | +      |                             |       |                         |
| <i>PCSK9</i>          | rs1998013  | TC    | 1   | 55,670,051  | 40,265   | T, C                   | 3.93 x 10 <sup>-17</sup>  | -      | rs2479409                   | 1     | 0.004                   |
|                       |            | LDL   | 1   | 55,730,618  | 36,329   | T, C                   | 1.97 x 10 <sup>-20</sup>  | -      | rs2479409                   | 1     | 0.004                   |
| <i>EVI5</i>           | rs531514   | HDL   | 1   | 93,412,233  | 97,559   | T, C                   | 7.46 x 10 <sup>-09</sup>  | +      | rs7515577                   | 0.71  | 0.052                   |
| <i>APOB</i>           | rs515135   | TC    | 2   | 21,197,709  | 97,140   | T, C                   | 6.38 x 10 <sup>-52</sup>  | -      | rs1367117                   | 1     | 0.11                    |
|                       |            | LDL   | 2   | 21,139,562  | 93,223   | T, C                   | 1.32 x 10 <sup>-56</sup>  | -      | rs1367117                   | 1     | 0.11                    |
|                       | rs668948   | TG    | 2   | 21,145,034  | 91,483   | A, G                   | 4.31 x 10 <sup>-10</sup>  | +      | rs1042034                   | 0.61  | 0.026                   |
| <i>ABCG5/8</i>        | rs4953023  | TC    | 2   | 43,985,651  | 90,564   | A, G                   | 1.18 x 10 <sup>-19</sup>  | -      | rs4299376                   | 1     | 0.032                   |
|                       |            | LDL   | 2   | 43,927,504  | 86,105   | A, G                   | 1.11 x 10 <sup>-23</sup>  | -      | rs4299376                   | 1     | 0.032                   |
| <i>RAB3GAP1</i>       | rs10445686 | LDL   | 2   | 135,609,842 | 93,223   | A, G                   | 3.82 x 10 <sup>-08</sup>  | -      | rs7570971                   | 1     | 0.15                    |
| <i>KLHL8</i>          | rs442177   | HDL   | 4   | 88,387,440  | 97,559   | T, G                   | 1.84 x 10 <sup>-08</sup>  | -      |                             |       |                         |
| <i>HLA</i>            | rs12660719 | TG    | 6   | 32,683,961  | 83,173   | A, G                   | 1.13 x 10 <sup>-08</sup>  | -      | rs2247056                   | 1     | 0.0056                  |
| <i>C6orf106</i>       | rs3800406  | LDL   | 6   | 35,241,052  | 86,867   | A, G                   | 1.69 x 10 <sup>-08</sup>  | +      |                             |       |                         |
| <i>CITED2</i>         | rs636202   | TG    | 6   | 139,885,276 | 93,855   | T, C                   | 2.56 x 10 <sup>-08</sup>  | +      |                             |       |                         |
| <i>LPA</i>            | rs10455872 | TC    | 6   | 160,980,529 | 90,193   | A, G                   | 2.67 x 10 <sup>-23</sup>  | -      | rs1564348                   | 0.04  | 0                       |
|                       |            | LDL   | 6   | 160,930,108 | 86,418   | A, G                   | 3.55 x 10 <sup>-21</sup>  | -      | rs1564348                   | 0.04  | 0                       |
|                       | rs486359   | TG    | 6   | 160,694,431 | 93,855   | C, G                   | 3.64 x 10 <sup>-09</sup>  | -      |                             |       |                         |
| <i>KLF14</i>          | rs1562398  | TG    | 7   | 130,108,471 | 93,855   | C, G                   | 2.37 x 10 <sup>-08</sup>  | -      |                             |       |                         |
| <i>LPL</i>            | rs7016529  | HDL   | 8   | 19,850,911  | 84,515   | T, C                   | 6.38 x 10 <sup>-37</sup>  | +      | rs12678919                  | 1     | 0.004                   |
|                       |            | TG    | 8   | 19,850,911  | 81,126   | T, C                   | 1.74 x 10 <sup>-29</sup>  | -      | rs12678919                  | 1     | 0.004                   |
| <i>TRIB1</i>          | rs12677676 | TC    | 8   | 126,571,708 | 68,665   | A, G                   | 2.04 x 10 <sup>-09</sup>  | -      | rs2954029                   | 0.73  | 0.045                   |
| <i>ABCA1</i>          | rs4149311  | TC    | 9   | 104,668,332 | 92,064   | T, C                   | 2.30 x 10 <sup>-10</sup>  | +      | rs1883025                   | 0.14  | 0.012                   |
|                       | rs1800978  | LDL   | 9   | 106,705,799 | 92,510   | C, G                   | 3.77 x 10 <sup>-08</sup>  | +      |                             |       |                         |
|                       | rs11789603 | HDL   | 9   | 104,726,574 | 94,899   | T, C                   | 4.49 x 10 <sup>-14</sup>  | +      | rs1883025                   | 0.22  | 0.014                   |
| <i>SPTY2D1</i>        | rs10128711 | LDL   | 11  | 18,589,560  | 88,177   | T, C                   | 2.66 x 10 <sup>-08</sup>  | -      |                             |       |                         |
| <i>APOA1-C3-A4-A5</i> | rs9804646  | TC    | 11  | 116,170,289 | 90,646   | T, C                   | 6.70 x 10 <sup>-12</sup>  | -      | rs964184                    | 0.065 | 0.002                   |
|                       | rs12225230 | HDL   | 11  | 116,233,840 | 97,559   | C, G                   | 6.77 x 10 <sup>-33</sup>  | +      | rs964184                    | 0.54  | 0.19                    |
| <i>ZNF664</i>         | rs11057244 | HDL   | 12  | 122,298,143 | 93,375   | C, G                   | 4.58 x 10 <sup>-09</sup>  | +      | rs4765127                   | 0.34  | 0.0062                  |
|                       | rs838880   | HDL   | 12  | 123,786,473 | 80,113   | T, C                   | 8.54 x 10 <sup>-15</sup>  | -      | rs4765127                   | 0.26  | 0.018                   |
| <i>NYNRIN</i>         | rs6573778  | TC    | 14  | 23,942,049  | 97,148   | T, C                   | 1.99 x 10 <sup>-08</sup>  | +      |                             |       |                         |
| <i>LIPC</i>           | rs261342   | TC    | 15  | 56,518,445  | 97,148   | C, G                   | 1.27 x 10 <sup>-21</sup>  | -      | rs1532085                   | 0.06  | 0.001                   |
|                       | rs2070895  | HDL   | 15  | 56,511,231  | 97,559   | A, G                   | 1.53 x 10 <sup>-80</sup>  | +      | rs1532085                   | 0.15  | 0.005                   |
|                       | rs261334   | TG    | 15  | 56,514,036  | 93,855   | C, G                   | 1.56 x 10 <sup>-13</sup>  | -      | rs1532085                   | 0.03  | 0                       |
| <i>CETP</i>           | rs9939224  | HDL   | 16  | 55,560,233  | 92,366   | T, G                   | 3.98 x 10 <sup>-120</sup> | -      | rs3764261                   | 1     | 0.12                    |

|                   |           |     |    |            |        |      |                        |   |           |       |       |
|-------------------|-----------|-----|----|------------|--------|------|------------------------|---|-----------|-------|-------|
| <i>LIPG</i>       | rs2040293 | HDL | 18 | 45,532,343 | 97,559 | A, G | $4.20 \times 10^{-08}$ | + | rs7241918 | 0.41  | 0.023 |
| <i>LDLR</i>       | rs688     | TC  | 19 | 11,088,602 | 92,775 | T, C | $2.60 \times 10^{-27}$ | + | rs6511720 | 0.19  | 0.003 |
|                   | rs5930    | LDL | 19 | 11,085,265 | 93,231 | A, G | $2.62 \times 10^{-39}$ | - | rs6511720 | 0.19  | 0.004 |
| <i>APOE-C1-C2</i> | rs395908  | TC  | 19 | 50,065,405 | 97,148 | A, G | $2.85 \times 10^{-47}$ | - | rs4420638 | 0.005 | 0     |
|                   | rs445925  | LDL | 19 | 50,107,480 | 23,783 | A, G | $1.57 \times 10^{-86}$ | - | rs4420638 | 0.27  | 0.002 |
|                   | rs5167    | HDL | 19 | 50,140,305 | 97,559 | T, G | $1.19 \times 10^{-08}$ | - | rs4420638 | 0.10  | 0.005 |
|                   | rs4803770 | TG  | 19 | 50,119,193 | 74,315 | C, G | $2.88 \times 10^{-12}$ | + | rs439401  | 0.87  | 0.25  |
| <i>FLJ36070</i>   | rs492602  | LDL | 19 | 53,898,229 | 90,280 | A, G | $4.69 \times 10^{-08}$ | - |           |       |       |
| <i>MAFB</i>       | rs6016382 | TC  | 20 | 38,614,660 | 97,148 | A, T | $3.86 \times 10^{-11}$ | - | rs2902940 | 0.12  | 0.011 |
|                   |           | LDL | 20 | 38,614,660 | 93,231 | A, T | $5.11 \times 10^{-10}$ | - | rs2902940 | 0.12  | 0.011 |

\* Positions are relative to Human Genome NCBI Build 36.

† Alleles are designated with respect to the “+” strand.

‡ D' or  $r^2$  between the post-conditioning best genome-wide significant SNP and, if this SNP was in one of the original genome-wide significant loci for the trait, the lead SNP in the locus (on which the analysis was conditioned). D' and  $r^2$  estimated in HapMap Phase II CEU individuals.

**Supplementary Table 7.** Loci exhibiting sex heterogeneity.

| Locus*                                                                                                  | SNP        | Chr | Position†   | Trait | Allele1,<br>Allele2‡ | Female <i>n</i> | Female<br><i>P</i> -value | Female Effect<br>(SE)§ | Male <i>n</i> | Male<br><i>P</i> -value | Male<br>Effect<br>(SE)§ | Heterogeneity<br><i>P</i> -value |
|---------------------------------------------------------------------------------------------------------|------------|-----|-------------|-------|----------------------|-----------------|---------------------------|------------------------|---------------|-------------------------|-------------------------|----------------------------------|
| Loci identified in primary analysis that also demonstrate heterogeneity of effect size in men and women |            |     |             |       |                      |                 |                           |                        |               |                         |                         |                                  |
| <b>LPL</b>                                                                                              | rs12678919 | 8   | 19,888,502  | HDL   | A, G                 | 62,816          | 4 x 10 <sup>-37</sup>     | -0.133<br>(0.01)       | 37,745        | 5 x 10 <sup>-50</sup>   | -0.196<br>(0.012)       | 3 x 10 <sup>-5</sup>             |
| <b>ZNF664</b>                                                                                           | rs12310367 | 12  | 123,052,631 | TG    | A, G                 | 59,473          | 4 x 10 <sup>-10</sup>     | 0.043<br>(0.007)       | 35,288        | 0.61                    | 0.002<br>(0.008)        | 5 x 10 <sup>-5</sup>             |
| <b>CILP2</b>                                                                                            | rs10401969 | 19  | 19,268,718  | TC    | T, C                 | 62,932          | 5 x 10 <sup>-11</sup>     | 0.095<br>(0.013)       | 37,873        | 2 x 10 <sup>-21</sup>   | 0.177<br>(0.017)        | 3 x 10 <sup>-5</sup>             |
| <b>CILP2</b>                                                                                            | rs10401969 | 19  | 19,268,718  | LDL   | T, C                 | 60,529          | 0.03                      | 0.030<br>(0.013)       | 35,734        | 9 x 10 <sup>-15</sup>   | 0.149<br>(0.017)        | 4 x 10 <sup>-9</sup>             |
| <b>APOE</b>                                                                                             | rs4420638  | 19  | 50,114,786  | TC    | A, G                 | 57,292          | 1 x 10 <sup>-72</sup>     | -0.188<br>(0.01)       | 32,624        | 6 x 10 <sup>-20</sup>   | -0.124<br>(0.012)       | 2 x 10 <sup>-5</sup>             |
| Loci with $P < 5 \times 10^{-8}$ in only one sex                                                        |            |     |             |       |                      |                 |                           |                        |               |                         |                         |                                  |
| <i>LRPAP1</i>                                                                                           | rs762861   | 4   | 3,411,809   | TG    | C, G                 | 53,412          | 4 x 10 <sup>-8</sup>      | 0.045<br>(0.009)       | 29,868        | 0.07                    | 0.020<br>(0.011)        | 0.07                             |
| <i>DHX16</i>                                                                                            | rs9262145  | 6   | 30,762,510  | LDL   | C, G                 | 61,803          | 0.80                      | -0.003<br>(0.007)      | 36,840        | 4 x 10 <sup>-8</sup>    | 0.048<br>(0.009)        | 1 x 10 <sup>-6</sup>             |
| <i>VEGFA</i>                                                                                            | rs998584   | 6   | 43,865,874  | TG    | A, C                 | 55,289          | 0.007                     | 0.020<br>(0.008)       | 31,104        | 1 x 10 <sup>-8</sup>    | 0.053<br>(0.009)        | 0.004                            |
| <b>KLF14</b>                                                                                            | rs1562398  | 7   | 13,010,8471 | TG    | C, G                 | 59,473          | 2 x 10 <sup>-12</sup>     | -0.046<br>(0.007)      | 35,288        | 0.05                    | -0.012<br>(0.008)       | 7 x 10 <sup>-4</sup>             |
| <i>SOX17</i>                                                                                            | rs10102164 | 8   | 55,584,167  | TC    | A, G                 | 64,235          | 0.01                      | 0.019<br>(0.007)       | 39,104        | 4 x 10 <sup>-10</sup>   | 0.059<br>(0.009)        | 4 x 10 <sup>-4</sup>             |
| <b>ABCA8</b>                                                                                            | rs740516   | 17  | 64,594,557  | LDL   | C, G                 | 61,233          | 7 x 10 <sup>-9</sup>      | 0.062<br>(0.011)       | 35,156        | 0.24                    | 0.027<br>(0.016)        | 0.05                             |
| <i>C20orf152</i>                                                                                        | rs7265718  | 20  | 34,098,855  | TC    | T, G                 | 64,235          | 0.02                      | 0.022<br>(0.009)       | 39,104        | 2 x 10 <sup>-8</sup>    | 0.062<br>(0.011)        | 0.003                            |

\* Bold indicates locus already identified as genome-wide significant in primary analysis.

† Positions are relative to Human Genome NCBI Build 36.

‡ Alleles are designated with respect to the “+” strand.

§ Effect sizes and standard errors are in s.d. units.

|| Pre-specified statistical threshold of  $P < 0.0005$  to account for multiple testing of 102 lead SNPs in 95 loci.

**Supplementary Table 8.** *Cis*-acting associations of SNPs with transcript levels in human liver.

| Lead SNP   | Chr | Position*   | Transcript gene symbol | # of samples | Major, minor alleles† | Mean expression |         |             | Transcript <i>P</i> -value | Trait | Lipid effect (modeled on minor allele) |
|------------|-----|-------------|------------------------|--------------|-----------------------|-----------------|---------|-------------|----------------------------|-------|----------------------------------------|
|            |     |             |                        |              |                       | Homo. major     | Hetero. | Homo. minor |                            |       |                                        |
| rs12027135 | 1   | 25,648,320  | <i>RHCE</i>            | 948          | T, A                  | -0.064          | 0.005   | 0.068       | 7E-54                      | LDL   | -                                      |
|            |     |             | <i>RHD</i>             | 953          | T, A                  | -0.030          | -0.008  | 0.027       | 4E-8                       | LDL   | -                                      |
|            |     |             | <i>TMEM50A</i>         | 955          | T, A                  | -0.028          | -0.010  | 0.024       | 4E-8                       | TC    | -                                      |
|            |     |             | <i>TMEM57</i>          | 954          | T, A                  | -0.088          | 0.004   | 0.081       | 2E-145                     | LDL   | -                                      |
|            |     |             |                        |              |                       |                 |         |             |                            | TC    | -                                      |
| rs2131925  | 1   | 62,798,530  | <i>ANGPTL3</i>         | 924          | T, G                  | 0.033           | -0.031  | -0.104      | 1E-13                      | TG    | -                                      |
|            |     |             |                        |              |                       |                 |         |             |                            | LDL   | -                                      |
|            |     |             | <i>DOCK7</i>           | 952          | T, G                  | -0.018          | 0.018   | 0.068       | 1E-22                      | TC    | -                                      |
|            |     |             |                        |              |                       |                 |         |             |                            | TG    | -                                      |
|            |     |             |                        |              |                       |                 |         |             |                            | LDL   | -                                      |
| rs629301   | 1   | 109,619,829 | <i>CELSR2</i>          | 951          | T, G                  | -0.053          | 0.114   | 0.268       | 5E-94                      | TC    | -                                      |
|            |     |             | <i>PSMA5</i>           | 955          | T, G                  | -0.0            |         |             |                            |       |                                        |

**Supplementary Table 9.** *Cis*-acting associations of SNPs with transcript levels in human omental fat.

| Lead SNP   | Chr | Position* | Transcript gene symbol | # of samples | Major, minor alleles† | Mean expression |         |             | Transcript <i>P</i> -value | Trait | Lipid effect (modeled on minor allele) |
|------------|-----|-----------|------------------------|--------------|-----------------------|-----------------|---------|-------------|----------------------------|-------|----------------------------------------|
|            |     |           |                        |              |                       | Homo. major     | Hetero. | Homo. minor |                            |       |                                        |
| rs12027135 | 1   | 25648320  | <i>RHCE</i>            | 730          | T, A                  | 0.025           | 0.002   | -0.026      | 3E-55                      | LDL   | -                                      |
|            |     |           | <i>RHD</i>             | 736          | T, A                  | -0.025          | -0.003  | 0.032       | 5E-10                      | LDL   | -                                      |
|            |     |           | <i>TMEM50A</i>         | 739          | T, A                  | 0.030           | 0.004   | -0.035      | 2E-29                      | TC    | -                                      |
|            |     |           | <i>TMEM57</i>          | 740          | T, A                  | 0.056           | 0.004   | -0.063      | 3E-115                     | LDL   | -                                      |
|            |     |           |                        |              |                       |                 |         |             |                            | TC    | -                                      |
| rs4660293  | 1   | 39800767  | <i>OXCT2</i>           | 740          | A, G                  | 0.074           | 0.041   | -0.051      | 2E-37                      | HDL   | -                                      |
| rs2131925  | 1   | 62798530  | <i>DOCK7</i>           | 738          | T, G                  | 0.126           | 0.032   | -0.069      | 3E-91                      | LDL   | -                                      |
|            |     |           |                        |              |                       |                 |         |             |                            | TC    | -                                      |
|            |     |           |                        |              |                       |                 |         |             |                            | TG    | -                                      |
| rs1260326  | 2   | 27584444  | <i>IFT172</i>          | 705          | C, T                  | -0.107          | 0.000   | 0.075       | 2E-65                      | TG    | +                                      |
|            |     |           |                        |              |                       |                 |         |             |                            | TC    | +                                      |
| rs10195252 | 2   | 165221337 | <i>GRB14</i>           | 734          | T, C                  | -0.079          | -0.008  | 0.040       | 1E-13                      | TG    | -                                      |
| rs2972146  | 2   | 226808942 | <i>IRS1</i>            | 714          | T, G                  | 0.047           | 0.009   | -0.026      | 2E-8                       | TG    | -                                      |
|            |     |           |                        |              |                       |                 |         |             |                            | HDL   | +                                      |
| rs3177928  | 6   | 32520413  | <i>HLA-DOA1</i>        | 740          | G, A                  | 0.171           | 0.275   | -0.051      | 2E-11                      | TC    | +                                      |
|            |     |           | <i>HLA-DOA2</i>        | 737          | G, A                  | -0.048          | -0.036  | 0.008       | 9E-13                      | TC    | +                                      |
|            |     |           | <i>HLA-DRB1</i>        | 728          | G, A                  | 0.264           | 0.274   | -0.058      | 1E-15                      | TC    | +                                      |
|            |     |           | <i>HLA-DRB5</i>        | 728          | G, A                  | 0.516           | 0.271   | -0.089      | 7E-12                      | TC    | +                                      |
|            |     |           |                        |              |                       |                 |         |             |                            |       |                                        |
| rs2814944  | 6   | 34660775  | <i>UHRF1BP1</i>        | 725          | G, A                  | 0.102           | 0.044   | -0.023      | 3E-25                      | HDL   | -                                      |
| rs9488822  | 6   | 116419586 | <i>FRK</i>             | 740          | A, T                  | -0.083          | -0.014  | 0.058       | 6E-33                      | TC    | -                                      |
|            |     |           |                        |              |                       |                 |         |             |                            | LDL   | -                                      |
|            |     |           |                        |              |                       |                 |         |             |                            | LDL   | -                                      |
|            |     |           | <i>NT5DC1</i>          | 735          | A, T                  | -0.013          | -0.007  | 0.018       | 1E-8                       | TC    | -                                      |
| rs3136441  | 11  | 46699823  | <i>ARHGAP1</i>         | 739          | T, C                  | 0.015           | -0.018  | -0.003      | 1E-9                       | HDL   | +                                      |
| rs174546   | 11  | 61326406  | <i>FADS1</i>           | 727          | C, T                  | -0.098          | -0.027  | 0.045       | 2E-8                       | HDL   | -                                      |
|            |     |           |                        |              |                       |                 |         |             |                            | LDL   | -                                      |
|            |     |           |                        |              |                       |                 |         |             |                            | TC    | -                                      |
|            |     |           |                        |              |                       |                 |         |             |                            | TG    | +                                      |
| rs7134594  | 12  | 108484576 | <i>MMAB</i>            | 738          | T, C                  | 0.093           | 0.022   | -0.082      | 1E-72                      | HDL   | -                                      |
| rs2652834  | 15  | 61183920  | <i>LACTB</i>           | 732          | G, A                  | 0.000           | -0.031  | 0.017       | 2E-11                      | HDL   | -                                      |
| rs16942887 | 16  | 66485543  | <i>ACD</i>             | 721          | G, A                  | -0.011          | -0.016  | 0.004       | 1E-8                       | HDL   | +                                      |
|            |     |           | <i>NFATC3</i>          | 741          | G, A                  | -0.068          | -0.032  | 0.008       | 4E-10                      | HDL   | +                                      |
|            |     |           | <i>PRMT7</i>           | 729          | G, A                  | 0.034           | 0.025   | -0.006      | 5E-9                       | HDL   | +                                      |
|            |     |           |                        |              |                       |                 |         |             |                            |       |                                        |
| rs11869286 | 17  | 35067382  | <i>CRKRS</i>           | 691          | C, G                  | 0.020           | -0.012  | -0.056      | 3E-18                      | HDL   | -                                      |
|            |     |           | <i>PERLD1</i>          | 737          | C, G                  | -0.014          | 0.007   | 0.038       | 1E-10                      | HDL   | -                                      |
|            |     |           |                        |              |                       |                 |         |             |                            |       |                                        |
| rs2277862  | 20  | 33616196  | <i>CEP250</i>          | 737          | C, T                  | -0.027          | 0.043   | 0.103       | 8E-37                      | TC    | -                                      |
|            |     |           | <i>CPNE1</i>           | 732          | C, T                  | 0.030           | -0.051  | -0.114      | 1E-73                      | TC    | -                                      |
|            |     |           | <i>ERGIC3</i>          | 731          | C, T                  | 0.014           | -0.015  | -0.062      | 2E-11                      | TC    | -                                      |

\* Positions are relative to Human Genome NCBI Build 36.

† Alleles are designated with respect to the “+” strand.

**Supplementary Table 10.** *Cis*-acting association of SNPs with transcript levels in human subcutaneous fat.

| Lead SNP   | Chr | Position* | Transcript gene symbol | # of samples | Major, minor alleles† | Mean expression |         |             | Transcript <i>P</i> -value | Trait | Lipid effect (modeled on minor allele) |
|------------|-----|-----------|------------------------|--------------|-----------------------|-----------------|---------|-------------|----------------------------|-------|----------------------------------------|
|            |     |           |                        |              |                       | Homo. major     | Hetero. | Homo. minor |                            |       |                                        |
| rs12027135 | 1   | 25648320  | <i>RHCE</i>            | 607          | T, A                  | 0.038           | 0.001   | -0.038      | 1E-41                      | LDL   | -                                      |
|            |     |           |                        |              |                       |                 |         |             |                            | TC    | -                                      |
|            |     |           | <i>TMEM50A</i>         | 609          | T, A                  | 0.040           | 0.005   | -0.041      | 2E-29                      | LDL   | -                                      |
|            |     |           |                        |              |                       |                 |         |             |                            | TC    | -                                      |
|            |     |           | <i>TMEM57</i>          | 609          | T, A                  | 0.080           | 0.004   | -0.082      | 1E-99                      | LDL   | -                                      |
|            |     |           |                        |              |                       |                 |         |             |                            | TC    | -                                      |
| rs4660293  | 1   | 39800767  | <i>OXCT2</i>           | 609          | A, G                  | 0.037           | 0.038   | -0.040      | 1E-17                      | HDL   | -                                      |
| rs2131925  | 1   | 62798530  | <i>DOCK7</i>           | 608          | T, G                  | 0.188           | 0.054   | -0.110      | 6E-80                      | TG    | -                                      |
|            |     |           |                        |              |                       |                 |         |             |                            | LDL   | -                                      |
|            |     |           |                        |              |                       |                 |         |             |                            | TC    | -                                      |
| rs1260326  | 2   | 27584444  | <i>IFT172</i>          | 582          | C, T                  | -0.102          | 0.000   | 0.071       | 8E-54                      | TC    | +                                      |
|            |     |           |                        |              |                       |                 |         |             |                            | TG    | +                                      |
| rs3177928  | 6   | 32520413  | <i>HLA-DQA1</i>        | 609          | G, A                  | 0.229           | 0.287   | -0.064      | 2E-10                      | TC    | +                                      |
|            |     |           | <i>HLA-DQA2</i>        | 605          | G, A                  | -0.067          | -0.082  | 0.017       | 6E-13                      | TC    | +                                      |
|            |     |           | <i>HLA-DRB1</i>        | 605          | G, A                  | -0.138          | -0.145  | 0.034       | 7E-13                      | TC    | +                                      |
|            |     |           | <i>HLA-DRB5</i>        | 604          | G, A                  | 0.517           | 0.315   | -0.103      | 2E-9                       | TC    | +                                      |
| rs2814944  | 6   | 34660775  | <i>UHRF1BP1</i>        | 589          | G, A                  | 0.095           | 0.041   | -0.024      | 2E-18                      | HDL   | -                                      |
| rs9488822  | 6   | 116419586 | <i>FRK</i>             | 607          | A, T                  | -0.073          | -0.007  | 0.052       | 3E-18                      | LDL   | -                                      |
|            |     |           |                        |              |                       |                 |         |             |                            | TC    | -                                      |
| rs17145738 | 7   | 72620810  | <i>MLXIPL</i>          | 539          | C, T                  | -0.020          | 0.018   | -0.035      | 2E-8                       | HDL   | +                                      |
|            |     |           |                        |              |                       |                 |         |             |                            | TG    | -                                      |
| rs7134594  | 12  | 108484576 | <i>MMAB</i>            | 606          | T, C                  | 0.093           | 0.026   | -0.079      | 4E-53                      | HDL   | -                                      |
| rs11869286 | 17  | 35067382  | <i>CRKRS</i>           | 588          | C, G                  | 0.024           | -0.018  | -0.042      | 3E-11                      | HDL   | -                                      |
|            |     |           | <i>GSDM1</i>           | 607          | C, G                  | 0.080           | -0.016  | -0.311      | 3E-8                       | HDL   | -                                      |
| rs2277862  | 20  | 33616196  | <i>CEP250</i>          | 609          | C, T                  | -0.029          | 0.047   | 0.138       | 6E-31                      | TC    | -                                      |
|            |     |           | <i>CPNE1</i>           | 607          | C, T                  | 0.031           | -0.050  | -0.138      | 1E-47                      | TC    | -                                      |
|            |     |           | <i>ERGIC3</i>          | 583          | C, T                  | 0.011           | -0.022  | -0.038      | 2E-8                       | TC    | -                                      |

\* Positions are relative to Human Genome NCBI Build 36.

† Alleles are designated with respect to the “+” strand.

**Supplementary Table 11.** Associations of lead SNPs in European and non-European groups.

| Locus          | Lead SNP   | Trait | Major Allele* | Minor Allele* | Primary meta-analysis<br>(n = 100,184) |         |       | European<br>(n = 7,063) |         | East Asian<br>(n = 15,046) |         | South Asian<br>(n = 9,705) |      | African American<br>(n = 8,061) |       |      |         |       |
|----------------|------------|-------|---------------|---------------|----------------------------------------|---------|-------|-------------------------|---------|----------------------------|---------|----------------------------|------|---------------------------------|-------|------|---------|-------|
|                |            |       |               |               | Dir.                                   | P-value | Het.† | Dir.                    | P-value | Dir.                       | P-value | Het.‡                      | Dir. | P-value                         | Het.‡ | Dir. | P-value | Het.‡ |
| <i>LDLRAP1</i> | rs12027135 | LDL   | T             | A             | -                                      | 1E-10   | N     | -                       | 1E-1    | -                          | 7E-5    | Y                          | -    | 3E-1                            | N     | -    | 4E-1    | N     |
|                |            | TC    | T             | A             | -                                      | 4E-11   | N     | -                       | 2E-1    | -                          | 3E-3    | N                          | -    | 2E-1                            | N     | n.d. | n.d.    |       |
| <i>PABPC4</i>  | rs4660293  | HDL   | A             | G             | -                                      | 4E-10   | N     | -                       | 2E-3    | -                          | 6E-3    | N                          | -    | 3E-1                            | N     | -    | 8E-1    | N     |
| <i>PCSK9</i>   | rs2479409  | LDL   | A             | G             | +                                      | 2E-28   | N     | +                       | 1E-1    | +                          | 4E-1    | Y                          | +    | 4E-2                            | N     | +    | 3E-3    | N     |
|                |            | TC    | A             | G             | +                                      | 4E-24   | N     | +                       | 5E-2    | +                          | 5E-1    | Y                          | +    | 1E-1                            | N     | n.d. | n.d.    |       |
| <i>ANGPTL3</i> | rs2131925  | TG    | T             | G             | -                                      | 9E-43   | N     | -                       | 3E-4    | -                          | 2E-7    | N                          | -    | 3E-7                            | N     | -    | 1E-3    | N     |
|                |            | LDL   | T             | G             | -                                      | 2E-17   | N     | -                       | 2E-3    | +                          | 7E-1    | N                          | -    | 9E-1                            | N     | -    | 1E-2    | N     |
|                |            | TC    | T             | G             | -                                      | 3E-40   | N     | -                       | 9E-5    | -                          | 6E-3    | N                          | -    | 1E-2                            | N     | n.d. | n       |       |

|                 |                        |     |   |   |   |        |   |   |       |      |       |   |      |       |   |      |      |   |
|-----------------|------------------------|-----|---|---|---|--------|---|---|-------|------|-------|---|------|-------|---|------|------|---|
| <i>TIMD4</i>    | rs6882076              | LDL | C | T | - | 2E-22  | N | - | 2E-2  | -    | 3E-2  | N | -    | 1E-1  | N | -    | 2E-1 | N |
|                 |                        | TC  | C | T | - | 8E-28  | N | - | 1E-3  | -    | 4E-3  | N | -    | 8E-3  | N | n.d. | n.d. |   |
|                 |                        | TG  | C | T | - | 1E-10  | N | - | 7E-2  | -    | 4E-2  | N | -    | 6E-4  | N | -    | 3E-1 | N |
| <i>MYLIP</i>    | rs3757354              | LDL | C | T | - | 1E-11  | N | - | 1E-2  | +    | 5E-1  | Y | +    | 2E-1  | Y | -    | 4E-2 | N |
|                 |                        | TC  | C | T | - | 3E-9   | N | - | 3E-1  | +    | 8E-1  | N | +    | 4E-1  | N | n.d. | n.d. |   |
| <i>HFE</i>      | rs1800562              | LDL | G | A | - | 6E-10  | N | - | 1E-2  | -    | 2E-1  | N | n.d. | n.d.  |   | -    | 8E-1 | N |
|                 |                        | TC  | G | A | - | 3E-8   | N | - | 1E-2  | -    | 3E-1  | N | n.d. | n.d.  |   | n.d. | n.d. |   |
| <i>HLA</i>      | rs2247056<br>rs3177928 | TG  | C | T | - | 2E-15  | N | - | 2E-3  | -    | 1E-1  | Y | -    | 8E-3  | N | +    | 9E-1 | N |
|                 |                        | LDL | G | A | + | 2E-15  | N | + | 3E-2  | +    | 6E-2  | N | +    | 1E-1  | N | +    | 2E-3 | N |
|                 |                        | TC  | G | A | + | 4E-19  | N | + | 6E-2  | +    | 8E-3  | N | +    | 2E-1  | N | n.d. | n.d. |   |
| <i>C6orf106</i> | rs2814982<br>rs2814944 | TC  | C | T | - | 5E-11  | N | + | 2E-1  | +    | 9E-1  | N | -    | 1E-1  | N | n.d. | n.d. |   |
|                 |                        | HDL | G | A | - | 4E-9   | N | - | 5E-1  | -    | 9E-1  | N | -    | 6E-1  | N | +    | 3E-1 | N |
| <i>FRK</i>      | rs9488822              | TC  | A | T | - | 2E-10  | N | - | 2E-1  | -    | 6E-1  | N | -    | 3E-2  | N | n.d. | n.d. |   |
|                 |                        | LDL | A | T | - | 4E-8   | N | - | 2E-1  | -    | 6E-1  | N | -    | 1E-2  | N | -    | 9E-1 | N |
| <i>CITED2</i>   | rs605066               | HDL | T | C | - | 3E-8   | N | - | 1E-2  | -    | 6E-2  | N | +    | 5E-1  | N | -    | 1    | N |
| <i>LPA</i>      | rs1564348<br>rs1084651 | LDL | T | C | + | 2E-17  | N | + | 2E-4  | +    | 9E-1  | N | n.d. | n.d.  |   | +    | 6E-2 | N |
|                 |                        | TC  | T | C | + | 1E-16  | N | + | 2E-3  | +    | 9E-1  | N | n.d. | n.d.  |   | n.d. | n.d. |   |
|                 |                        | HDL | G | A | - | 3E-8   | N | - | 1E-2  | -    | 1E-1  | N | n.d. | n.d.  |   | -    | 3E-1 | N |
| <i>DNAH11</i>   | rs12670798             | TC  | T | C | + | 9E-10  | N | + | 1E-2  | +    | 4E-1  | Y | +    | 5E-2  | N | n.d. | n.d. |   |
|                 |                        | LDL | T | C | + | 7E-10  | N | + | 1E-2  | +    | 1     | Y | +    | 1E-1  | N | -    | 6E-1 | N |
| <i>NPC1L1</i>   | rs2072183              | TC  | G | C | + | 3E-11  | N | + | 3E-1  | -    | 7E-1  | Y | +    | 5E-2  | N | n.d. | n.d. |   |
|                 |                        | LDL | G | C | + | 7E-11  | N | + | 1     | -    | 8E-1  | Y | +    | 2E-2  | N | +    | 4E-1 | N |
| <i>TYW1B</i>    | rs13238203             | TG  | C | T | - | 1E-9   | N | - | 6E-1  | n.d. | n.d.  |   | n.d. | n.d.  |   | n.d. | n.d. |   |
| <i>MLXIPL</i>   | rs17145738             | TG  | C | T | - | 6E-58  | N | - | 2E-5  | -    | 2E-6  | N | -    | 3E-11 | N | -    | 2E-1 | N |
|                 |                        | HDL | C | T | + | 1E-9   | N | + | 1E-1  | +    | 1     | Y | +    | 3E-1  | N | -    | 2E-2 | Y |
| <i>KLF14</i>    | rs4731702              | HDL | C | T | + | 1E-15  | N | + | 2E-1  | +    | 2E-1  | N | +    | 3E-3  | N | +    | 2E-1 | N |
| <i>PPP1R3B</i>  | rs9987289              | HDL | G | A | - | 6E-25  | Y | - | 2E-2  | -    | 4E-2  | Y | -    | 4E-6  | N | -    | 4E-5 | N |
|                 |                        | LDL | G | A | - | 2E-14  | N | - | 9E-2  | -    | 2E-1  | N | -    | 3E-3  | N | -    | 7E-2 | N |
|                 |                        | TC  | G | A | - | 7E-23  | N | - | 9E-2  | -    | 1E-1  | N | -    | 8E-3  | N | n.d. | n.d. |   |
| <i>PINX1</i>    | rs11776767             | TG  | G | C | + | 1E-8   | N | - | 8E-1  | +    | 5E-1  | N | +    | 5E-3  | N | +    | 3E-1 | N |
| <i>NAT2</i>     | rs1495741              | TC  | A | G | + | 3E-8   | N | - | 1     | +    | 6E-1  | N | +    | 8E-1  | N | n.d. | n.d. |   |
|                 |                        | TG  | A | G | + | 5E-14  | N | - | 7E-1  | +    | 8E-2  | Y | +    | 4E-2  | N | +    | 4E-1 | N |
| <i>LPL</i>      | rs12678919             | HDL | A | G | + | 1E-97  | N | + | 4E-7  | +    | 7E-17 | N | +    | 2E-7  | N | +    | 1E-3 | N |
|                 |                        | TG  | A | G | - | 2E-115 | Y | - | 1E-11 | -    | 6E-18 | N | -    | 7E-15 | N | -    | 5E-3 | N |
| <i>CYP7A1</i>   | rs2081687              | LDL | C | T | + | 2E-8   | N | + | 1E-1  | +    | 1     | N | +    | 7E-1  | N | +    | 8E-1 | N |
|                 |                        | TC  | C | T | + | 2E-12  | N | + | 2E-1  | +    | 5E-1  | Y | +    | 4E-1  | N | n.d. | n.d. |   |
| <i>TRPS1</i>    | rs2293889              | HDL | G | T | - | 6E-11  | N | - | 6E-2  | -    | 2E-3  | N | -    | 9E-2  | N | -    | 3E-1 | N |
|                 |                        | TC  | A | C | - | 3E-8   | N | - | 5E-2  | -    | 2E-3  | N | +    | 9E-1  | N | n.d. | n.d. |   |
| <i>TRIB1</i>    | rs2954029              | LDL | A | T | - | 5E-29  | N | - | 7E-2  | -    | 2E-4  | N | -    | 2E-2  | N | -    | 6E-1 | N |
|                 |                        | TC  | A | T | - | 1E-35  | N | - | 4E-4  | -    | 4E-8  | N | -    | 3E-4  | N | n.d. | n.d. |   |
|                 |                        | TG  | A | T | - | 3E-55  | N | - | 8E-6  | -    | 1E-9  | N | -    | 3E-6  | N | -    | 3E-1 | N |
|                 |                        | HDL | A | T | + | 5E-18  | N | + | 3E-2  | -    | 7E-1  | Y | +    | 2E-1  | N | +    | 2E-1 | N |
| <i>PLEC1</i>    | rs11136341             | LDL | A | G | + | 4E-13  | N | + | 7E-1  | +    | 1E-2  | N | +    | 5E-1  | N | +    | 5E-2 | N |
|                 |                        | TC  | A | G | + | 9E-10  | N | + | 9E-1  | +    | 5E-3  | N | +    | 8E-1  | N | n.d. | n.d. |   |
| <i>TTC39B</i>   | rs581080               | HDL | C | G | - | 3E-12  | N | - | 1E-1  | +    | 4E-1  | N | -    | 6E-2  | N | -    | 5E-1 | N |

|                  |            |     |   |   |   |        |   |      |       |      |       |   |      |       |   |      |      |   |
|------------------|------------|-----|---|---|---|--------|---|------|-------|------|-------|---|------|-------|---|------|------|---|
| <i>TTC39B</i>    |            | TC  | C | G | - | 3E-9   | N | +    | 6E-1  | -    | 7E-1  | Y | -    | 6E-1  | N | n.d. | n.d. |   |
| <i>ABCA1</i>     | rs1883025  | HDL | C | T | - | 2E-33  | Y | -    | 9E-2  | -    | 2E-12 | N | -    | 2E-5  | N | -    | 3E-1 | N |
|                  |            | TC  | C | T | - | 3E-27  | N | -    | 5E-5  | -    | 5E-7  | Y | -    | 2E-2  | N | n.d. | n.d. |   |
| <i>ABO</i>       | rs9411489  | TC  | C | T | + | 5E-10  | N | n.d. | n.d.  | n.d. | n.d.  |   | n.d. | n.d.  |   | n.d. | n.d. |   |
|                  |            | LDL | C | T | + | 6E-13  | N | n.d. | n.d.  | n.d. | n.d.  |   | n.d. | n.d.  |   | n.d. | n.d. |   |
| <i>JMJD1C</i>    | rs10761731 | TG  | A | T | - | 4E-12  | N | -    | 4E-3  | -    | 4E-4  | N | -    | 5E-1  | N | -    | 8E-1 | N |
| <i>CYP26A1</i>   | rs2068888  | TG  | G | A | - | 2E-8   | N | -    | 5E-1  | -    | 8E-2  | N | -    | 6E-1  | N | -    | 7E-1 | N |
| <i>GPAM</i>      | rs2255141  | LDL | G | A | + | 2E-9   | N | +    | 1E-1  | +    | 8E-3  | N | +    | 2E-1  | N | +    | 5E-2 | N |
|                  |            | TC  | G | A | + | 2E-10  | N | +    | 3E-1  | +    | 3E-3  | N | +    | 2E-1  | N | n.d. | n.d. |   |
| <i>AMPD3</i>     | rs2923084  | HDL | A | G | - | 5E-8   | N | -    | 8E-1  | -    | 4E-1  | N | +    | 5E-1  | N | -    | 4E-2 | N |
| <i>SPTY2D1</i>   | rs10128711 | TC  | C | T | - | 3E-8   | N | -    | 6E-2  | +    | 4E-1  | Y | -    | 5E-1  | N | n.d. | n.d. |   |
| <i>LRP4</i>      | rs3136441  | HDL | T | C | + | 4E-18  | N | +    | 5E-4  | +    | 2E-1  | N | +    | 3E-3  | N | n.d. | n.d. |   |
| <i>FADS1-2-3</i> | rs174546   | TG  | C | T | + | 5E-24  | N | +    | 2E-1  | +    | 2E-3  | N | +    | 3E-5  | N | +    | 3E-5 | N |
|                  |            | TC  | C | T | - | 3E-22  | N | -    | 2E-5  | -    | 2E-2  | N | -    | 2E-2  | N | n.d. | n.d. |   |
|                  |            | LDL | C | T | - | 2E-21  | N | -    | 1E-3  | -    | 4E-3  | N | -    | 8E-3  | N | -    | 2E-1 | N |
|                  |            | HDL | C | T | - | 3E-22  | N | -    | 3E-2  | -    | 6E-2  | N | -    | 5E-5  | N | -    | 1E-1 | N |
| <i>APOC3</i>     | rs964184   | HDL | C | G | - | 5E-47  | N | -    | 2E-2  | -    | 1E-23 | N | -    | 3E-5  | N | -    | 3E-1 | Y |
|                  |            | LDL | C | G | + | 2E-26  | Y | +    | 2E-3  | -    | 2E-1  | Y | -    | 3E-1  | Y | +    | 9E-1 | Y |
|                  |            | TC  | C | G | + | 6E-57  | Y | +    | 2E-9  | +    | 2E-2  | Y | +    | 1E-4  | N | n.d. | n.d. |   |
|                  |            | TG  | C | G | + | 7E-240 | Y | +    | 4E-28 | +    | 2E-50 | N | +    | 9E-52 | Y | +    | 2E-1 | Y |
| <i>UBASH3B</i>   | rs7941030  | TC  | T | C | + | 2E-10  | N | +    | 4E-1  | +    | 3E-2  | N | +    | 5E-2  | N | n.d. | n.d. |   |
|                  |            | HDL | T | C | + | 3E-8   | N | -    | 6E-1  | -    | 9E-1  | Y | +    | 8E-2  | N | +    | 1E-2 | N |
| <i>ST3GAL4</i>   | rs11220462 | LDL | G | A | + | 1E-15  | N | +    | 8E-2  | +    | 4E-2  | N | +    | 2E-1  | N | +    | 4E-1 | N |
|                  |            | TC  | G | A | + | 6E-11  | N | +    | 4E-1  | +    | 1E-1  | N | +    | 3E-1  | N | n.d. | n.d. |   |
| <i>PDE3A</i>     | rs7134375  | HDL | C | A | + | 4E-8   | N | +    | 8E-1  | +    | 1E-1  | N | +    | 8E-1  | N | +    | 3E-1 | N |
| <i>LRP1</i>      | rs11613352 | TG  | C | T | - | 4E-10  | N | -    | 6E-2  | -    | 3E-1  | N | n.d. | n.d.  |   | -    | 2E-2 | N |
|                  |            | HDL | C | T | + | 4E-8   | N | +    | 5E-3  | +    | 2E-1  | N | n.d. | n.d.  |   | +    | 1E-1 | N |
| <i>MVK</i>       | rs7134594  | HDL | T | C | - | 7E-15  | N | -    | 7E-3  | -    | 2E-1  | N | n.d. | n.d.  |   | -    | 2E-1 | N |
| <i>BRAP</i>      | rs11065987 | LDL | A | G | - | 2E-9   | N | -    | 9E-1  | -    | 3E-1  | N | n.d. | n.d.  |   | -    | 2E-1 | N |
|                  |            | TC  | A | G | - | 7E-12  | N | -    | 6E-1  | -    | 2E-1  | N | n.d. | n.d.  |   | n.d. | n.d. |   |
| <i>TCF1</i>      | rs1169288  | LDL | A | C | + | 1E-15  | N | +    | 6E-3  | +    | 9E-2  | N | +    | 2E-1  | N | +    | 4E-1 | N |
|                  |            | TC  | A | C | + | 2E-14  | N | +    | 1E-3  | +    | 2E-1  | N | +    | 2E-1  | N | n.d. | n.d. |   |
| <i>SBNO1</i>     | rs4759375  | HDL | C | T | + | 8E-9   | N | +    | 3E-1  | n.d. | n.d.  |   | n.d. | n.d.  |   | +    | 3E-1 | N |
| <i>ZNF664</i>    | rs4765127  | HDL | G | T | + | 3E-10  | N | -    | 9E-1  | +    | 4E-1  | Y | -    | 9E-1  | N | +    | 9E-3 | N |
|                  |            | TG  | G | T | - | 2E-8   | N | +    | 9E-1  | -    | 6E-1  | N | -    | 8E-1  | N | -    | 9E-1 | N |
| <i>SCARB1</i>    | rs838880   | HDL | T | C | + | 3E-14  | N | +    | 3E-2  | +    | 9E-1  | N | -    | 7E-1  | N | n.d. | n.d. |   |
| <i>KIAA1305</i>  | rs8017377  | LDL | G | A | + | 5E-11  | N | +    | 3E-1  | -    | 1     | N | +    | 8E-2  | N | +    | 5E-2 | N |
| <i>CAPN3</i>     | rs2412710  | TG  | G | A | + | 2E-8   | N | +    | 5E-1  | n.d. | n.d.  |   | n.d. | n.d.  |   | -    | 5E-1 | N |
| <i>FRMD5</i>     | rs2929282  | TG  | A | T | + | 2E-11  | N | +    | 7E-2  | -    | 3E-1  | N | -    | 6E-1  | N | -    | 5E-1 | Y |
| <i>LIPC</i>      | rs1532085  | HDL | G | A | + | 3E-96  | Y | +    | 5E-12 | +    | 4E-30 | N | +    | 9E-3  | N | +    | 5E-3 | N |
|                  |            | TC  | G | A | + | 9E-20  | N | +    | 1E-1  | +    | 6E-8  | N | +    | 2E-1  | N | n.d. | n.d. |   |
|                  |            | TG  | G | A | + | 2E-11  | N | +    | 4E-1  | +    | 1E-4  | N | +    | 2E-1  | N | +    | 2E-3 | N |
| <i>LACTB</i>     | rs2652834  | HDL | G | A | - | 9E-9   | N | -    | 7E-1  | n.d. | n.d.  |   | n.d. | n.d.  |   | n.d. | n.d. |   |
| <i>CTF1</i>      | rs11649653 | TG  | C | G | - | 3E-8   | N | -    | 2E-1  | n.d. | n.d.  |   | n.d. | n.d.  |   | +    | 5E-1 | N |
| <i>CETP</i>      | rs3764261  | LDL | C | A | - | 2E-12  | N | -    | 4E-5  | +    | 4E-1  | N | -    | 8E-3  | N | -    | 2E-1 | N |

|                 |            |     |   |   |   |        |   |   |       |      |       |   |      |       |   |      |       |   |
|-----------------|------------|-----|---|---|---|--------|---|---|-------|------|-------|---|------|-------|---|------|-------|---|
| <i>CETP</i>     |            | HDL | C | A | + | 7e-380 | Y | + | 6E-36 | +    | 6E-19 | N | +    | 4E-38 | N | +    | 3E-18 | N |
|                 |            | TC  | C | A | + | 7E-14  | N | + | 9E-1  | +    | 5E-3  | N | +    | 2E-1  | N | n.d. | n.d.  |   |
|                 |            | TG  | C | A | - | 6E-12  | N | - | 3E-3  | -    | 5E-3  | N | +    | 1     | N | -    | 7E-1  | N |
| <i>LCAT</i>     | rs16942887 | HDL | G | A | + | 8E-33  | N | + | 6E-1  | +    | 3E-3  | N | +    | 5E-7  | N | +    | 1E-10 | N |
| <i>HPR</i>      | rs2000999  | LDL | G | A | + | 2E-22  | N | + | 6E-2  | +    | 3E-6  | N | +    | 1E-1  | N | -    | 1     | N |
|                 |            | TC  | G | A | + | 3E-24  | N | + | 1E-5  | +    | 2E-4  | N | +    | 6E-2  | N | n.d. | n.d.  |   |
| <i>CMIP</i>     | rs2925979  | HDL | C | T | - | 2E-11  | N | - | 1E-2  | -    | 5E-2  | N | -    | 1E-3  | N | -    | 1E-1  | N |
| <i>STARD3</i>   | rs11869286 | HDL | C | G | - | 1E-13  | N | - | 5E-2  | -    | 2E-2  | N | -    | 4E-1  | N | -    | 3E-2  | N |
| <i>OSBPL7</i>   | rs7206971  | LDL | G | A | + | 2E-8   | N | + | 4E-1  | +    | 6E-1  | N | -    | 7E-1  | N | +    | 1E-1  | N |
|                 |            | TC  | G | A | + | 1E-8   | N | + | 3E-1  | +    | 2E-1  | N | -    | 6E-1  | N | n.d. | n.d.  |   |
| <i>ABCA8</i>    | rs4148008  | HDL | C | G | - | 2E-10  | N | - | 1     | -    | 6E-2  | N | -    | 1E-1  | N | -    | 9E-1  | N |
| <i>PGS1</i>     | rs4129767  | HDL | A | G | - | 8E-9   | N | - | 3E-1  | -    | 8E-3  | N | -    | 1E-1  | N | -    | 7E-1  | N |
| <i>LIPG</i>     | rs7241918  | HDL | T | G | - | 3E-49  | N | - | 5E-4  | -    | 3E-3  | N | -    | 3E-5  | N | -    | 8E-1  | N |
|                 |            | TC  | T | G | - | 6E-19  | N | - | 3E-3  | +    | 8E-1  | Y | -    | 1E-2  | N | n.d. | n.d.  |   |
| <i>MC4R</i>     | rs12967135 | HDL | G | A | - | 7E-9   | N | - | 8E-2  | -    | 7E-1  | N | -    | 6E-4  | N | -    | 6E-1  | N |
| <i>ANGPTL4</i>  | rs7255436  | HDL | A | C | - | 3E-8   | N | - | 4E-2  | -    | 4E-1  | N | -    | 6E-3  | N | -    | 3E-1  | N |
| <i>LDLR</i>     | rs6511720  | LDL | G | T | - | 4E-117 | Y | - | 1E-14 | -    | 7E-3  | N | n.d. | n.d.  |   | -    | 5E-8  | N |
|                 |            | TC  | G | T | - | 7E-97  | N | - | 4E-11 | -    | 7E-2  | N | n.d. | n.d.  |   | n.d. | n.d.  |   |
| <i>LOC55908</i> | rs737337   | HDL | T | C | - | 3E-9   | N | - | 2E-1  | -    | 5E-4  | N | -    | 6E-7  | N | -    | 6E-6  | N |
| <i>CILP2</i>    | rs10401969 | LDL | T | C | - | 7E-22  | Y | - | 1E-1  | -    | 2E-1  | N | -    | 4E-1  | N | +    | 2E-1  | Y |
|                 |            | TC  | T | C | - | 3E-38  | Y | - | 3E-2  | -    | 2E-2  | N | -    | 8E-3  | N | n.d. | n.d.  |   |
|                 |            | TG  | T | C | - | 2E-29  | N | - | 3E-4  | -    | 9E-5  | N | -    | 8E-10 | N | +    | 5E-1  | Y |
| <i>APOE</i>     | rs439401   | TG  | C | T | - | 1E-30  | Y | - | 5E-3  | -    | 4E-5  | N | -    | 1E-7  | N | n.d. | n.d.  |   |
|                 | rs4420638  | HDL | A | G | - | 4E-21  | N | - | 2E-3  | -    | 3E-10 | N | -    | 5E-5  | N | +    | 5E-2  | Y |
|                 |            | LDL | A | G | + | 9E-147 | Y | + | 5E-19 | +    | 2E-5  | Y | +    | 5E-2  | Y | +    | 1     | Y |
|                 |            | TC  | A | G | + | 5E-111 | Y | + | 5E-16 | +    | 1E-5  | Y | +    | 2E-2  | N | n.d. | n.d.  |   |
| <i>FLJ36070</i> | rs492602   | TC  | A | G | + | 2E-10  | N | + | 1E-1  | -    | 9E-1  | N | +    | 3E-7  | N | n.d. | n.d.  |   |
| <i>LILRA3</i>   | rs386000   | HDL | G | C | + | 4E-16  | N | + | 4E-1  | -    | 5E-1  | N | +    | 3E-4  | N | -    | 6E-1  | N |
| <i>ERGIC3</i>   | rs2277862  | TC  | C | T | - | 4E-10  | N | - | 6E-1  | -    | 2E-1  | N | -    | 4E-2  | N | n.d. | n.d.  |   |
| <i>MAFB</i>     | rs2902940  | TC  | A | G | - | 6E-11  | N | + | 6E-1  | +    | 2E-1  | Y | -    | 2E-1  | N | n.d. | n.d.  |   |
|                 |            | LDL | A | G | - | 2E-8   | N | - | 5E-1  | +    | 7E-1  | Y | -    | 2E-1  | N | -    | 9E-1  | N |
| <i>TOP1</i>     | rs6029526  | TC  | T | A | + | 9E-17  | N | + | 4E-5  | +    | 1E-3  | N | +    | 1E-1  | N | n.d. | n.d.  |   |
|                 |            | LDL | T | A | + | 4E-19  | N | + | 7E-4  | +    | 2E-3  | N | +    | 1E-1  | N | +    | 4E-1  | N |
| <i>HNF4A</i>    | rs1800961  | HDL | C | T | - | 1E-15  | N | - | 1E-5  | -    | 5E-1  | N | -    | 5E-3  | N | +    | 9E-1  | N |
|                 |            | TC  | C | T | - | 6E-13  | N | + | 2E-1  | -    | 1E-1  | N | -    | 2E-1  | N | n.d. | n.d.  |   |
| <i>PLTP</i>     | rs6065906  | TG  | T | C | + | 3E-17  | N | + | 8E-4  | +    | 9E-1  | N | +    | 1E-1  | N | +    | 4E-1  | N |
|                 |            | HDL | T | C | - | 2E-22  | N | - | 1E-2  | +    | 1     | N | -    | 4E-1  | N | -    | 3E-2  | N |
| <i>UBE2L3</i>   | rs181362   | HDL | C | T | - | 1E-8   | N | - | 7E-2  | -    | 1E-4  | N | -    | 7E-3  | N | -    | 7E-1  | N |
| <i>PLA2G6</i>   | rs5756931  | TG  | T | C | - | 4E-8   | N | - | 3E-1  | n.d. | n.d.  |   | n.d. | n.d.  |   | -    | 5E-2  | N |

n.d. = not determined.

\* Alleles are designated with respect to the “+” strand.

† “Y” if inter-cohort heterogeneity  $P < 0.0005$  (to account for multiple testing of 102 lead SNPs in 95 loci), “N” otherwise.‡ “Y” if the heterogeneity  $P$ -value between effect size in the non-European group and effect size in the primary meta-analysis  $< 0.0005$  (to account for multiple testing of 102 lead SNPs in 95 loci), “N” otherwise.

**Supplementary Table 12.** Multi-ethnic replication summary.

| Cohort            | Trait | # of SNPs tested | # of SNPs in same direction* | Binomial <i>P</i> -value | # of SNPs in same direction with <i>P</i> < 0.05† | Binomial <i>P</i> -value |
|-------------------|-------|------------------|------------------------------|--------------------------|---------------------------------------------------|--------------------------|
| European          | HDL   | 47               | 44                           | $1 \times 10^{-10}$      | 23                                                | $< 2 \times 10^{-16}$    |
|                   | LDL   | 36               | 35                           | $5 \times 10^{-10}$      | 18                                                | $7 \times 10^{-15}$      |
|                   | TC    | 51               | 46                           | $1 \times 10^{-9}$       | 25                                                | $< 2 \times 10^{-16}$    |
|                   | TG    | 32               | 29                           | $1 \times 10^{-6}$       | 15                                                | $4 \times 10^{-12}$      |
| East Asian        | HDL   | 44               | 38                           | $5 \times 10^{-7}$       | 18                                                | $1 \times 10^{-12}$      |
|                   | LDL   | 36               | 29                           | $2 \times 10^{-4}$       | 16                                                | $4 \times 10^{-12}$      |
|                   | TC    | 51               | 43                           | $3 \times 10^{-7}$       | 24                                                | $4 \times 10^{-18}$      |
|                   | TG    | 28               | 26                           | $2 \times 10^{-6}$       | 16                                                | $3 \times 10^{-14}$      |
| South Asian       | HDL   | 39               | 35                           | $2 \times 10^{-7}$       | 22                                                | $< 2 \times 10^{-16}$    |
|                   | LDL   | 32               | 29                           | $1 \times 10^{-6}$       | 12                                                | $1 \times 10^{-8}$       |
|                   | TC    | 46               | 43                           | $2 \times 10^{-10}$      | 19                                                | $1 \times 10^{-13}$      |
|                   | TG    | 27               | 24                           | $3 \times 10^{-5}$       | 16                                                | $6 \times 10^{-15}$      |
| African American‡ | HDL   | 44               | 37                           | $3 \times 10^{-6}$       | 14                                                | $8 \times 10^{-9}$       |
|                   | LDL   | 36               | 33                           | $1 \times 10^{-7}$       | 10                                                | $4 \times 10^{-6}$       |
|                   | TC    | n.d.             | n.d.                         | n.d.                     | n.d.                                              | n.d.                     |
|                   | TG    | 30               | 24                           | $7 \times 10^{-4}$       | 10                                                | $6 \times 10^{-7}$       |

\* The “Number of SNPs in same direction” column indicates the number of SNPs for which the direction of effect is concordant between GLGC and the European or non-European cohort for each trait. The *P*-value reported is one-tailed, based on a binomial draw with null expectation  $P = 0.5$ .

† The “Number of SNPs in same direction with  $P < 0.05$ ” column indicates the number of SNPs for which the direction of effect is concordant between GLGC and the European or non-European cohort, and the *p*-value for SNP-trait association in the European or non-European cohort is  $< 0.05$ . The *P*-value reported is one-tailed, based on a binomial draw with null expectation  $P = 0.05$ .

‡ Analyses for total cholesterol were unavailable for the African American cohorts; n.d. = not determined.

**Supplementary Table 13.** Additional replication in Europeans.

| Locus           | Lead SNP   | Trait | Major Allele* | Minor Allele* | Primary meta-analysis<br>( <i>n</i> = 100,184) |                 | MDC-CC & FINRISK97<br>meta-analysis<br>( <i>n</i> = 12,017) <sup>†</sup> |                 |
|-----------------|------------|-------|---------------|---------------|------------------------------------------------|-----------------|--------------------------------------------------------------------------|-----------------|
|                 |            |       |               |               | Dir.                                           | <i>P</i> -value | Dir.                                                                     | <i>P</i> -value |
| <i>PABPC4</i>   | rs4660293  | HDL   | A             | G             | -                                              | 4E-10           | -                                                                        | 3E-1            |
| <i>ZNF648</i>   | rs1689800  | HDL   | A             | G             | -                                              | 3E-10           | -                                                                        | 3E-3            |
| <i>IRF2BP2</i>  | rs514230   | LDL   | T             | A             | -                                              | 9E-12           | +                                                                        | 8E-1            |
| <i>MSL2L1</i>   | rs645040   | TG    | T             | G             | -                                              | 3E-8            | -                                                                        | 4E-2            |
| <i>KLHL8</i>    | rs442177   | TG    | T             | G             | -                                              | 9E-12           | -                                                                        | 6E-2            |
| <i>SLC39A8</i>  | rs13107325 | HDL   | C             | T             | -                                              | 7E-11           | -                                                                        | 6E-3            |
| <i>MAP3K1</i>   | rs9686661  | TG    | C             | T             | +                                              | 1E-10           | +                                                                        | 4E-3            |
| <i>MYLIP</i>    | rs3757354  | LDL   | C             | T             | -                                              | 1E-11           | -                                                                        | 2E-3            |
| <i>HFE</i>      | rs1800562  | LDL   | G             | A             | -                                              | 6E-10           | +                                                                        | 9E-1            |
| <i>HLA</i>      | rs3177928  | LDL   | G             | A             | +                                              | 2E-15           | +                                                                        | 9E-3            |
| <i>NPC1L1</i>   | rs2072183  | LDL   | G             | C             | +                                              | 7E-11           | +                                                                        | 1E-2            |
| <i>KLF14</i>    | rs4731702  | HDL   | C             | T             | +                                              | 1E-15           | +                                                                        | 1E-2            |
| <i>PPPIR3B</i>  | rs9987289  | HDL   | G             | A             | -                                              | 6E-25           | -                                                                        | 7E-6            |
| <i>JMJD1C</i>   | rs10761731 | TG    | A             | T             | -                                              | 4E-12           | -                                                                        | 6E-1            |
| <i>UBASH3B</i>  | rs7941030  | HDL   | T             | C             | +                                              | 3E-8            | +                                                                        | 3E-2            |
| <i>PDE3A</i>    | rs7134375  | HDL   | C             | A             | +                                              | 4E-8            | +                                                                        | 5E-2            |
| <i>SCARB1</i>   | rs838880   | HDL   | T             | C             | +                                              | 3E-14           | +                                                                        | 8E-5            |
| <i>KIAA1305</i> | rs8017377  | LDL   | G             | A             | +                                              | 5E-11           | +                                                                        | 1E-1            |
| <i>CAPN3</i>    | rs2412710  | TG    | G             | A             | +                                              | 2E-8            | +                                                                        | 2E-2            |
| <i>HPR</i>      | rs2000999  | LDL   | G             | A             | +                                              | 2E-22           | +                                                                        | 7E-1            |
| <i>CMIP</i>     | rs2925979  | HDL   | C             | T             | -                                              | 2E-11           | -                                                                        | 1E-2            |
| <i>STARD3</i>   | rs11869286 | HDL   | C             | G             | -                                              | 1E-13           | -                                                                        | 1E-1            |
| <i>PGS1</i>     | rs4129767  | HDL   | A             | G             | -                                              | 8E-9            | -                                                                        | 9E-1            |
| <i>LOC55908</i> | rs737337   | HDL   | T             | C             | -                                              | 3E-9            | -                                                                        | 6E-5            |
| <i>LILRA3</i>   | rs386000   | HDL   | G             | C             | +                                              | 4E-16           | +                                                                        | 1E-4            |
| <i>TOP1</i>     | rs6029526  | LDL   | T             | A             | +                                              | 4E-19           | +                                                                        | 4E-1            |

\* Alleles are designated with respect to the “+” strand.

<sup>†</sup> Includes 7,026 individuals from the National FINRISK 1997 Study (FINRISK97) and 4,991 individuals from Malmö Diet and Cancer Study – Cardiovascular Cohort (MDC-CC).

**Supplementary Table 14.** HapMap SNPs in high linkage disequilibrium with lead SNPs.

| Locus            | Trait(s)         | Lead SNP   | # SNPs with $r^2 \geq 0.8$ in CEU* | # SNPs with $r^2 \geq 0.8$ in CEU & JPT+CHB* | # SNPs with $r^2 \geq 0.8$ in CEU & YRI* |
|------------------|------------------|------------|------------------------------------|----------------------------------------------|------------------------------------------|
| <i>SPTY2D1</i>   | TC               | rs10128711 | 7                                  | 7 (7)                                        | 5 (7)                                    |
| <i>COBLL1</i>    | TG               | rs10195252 | 6                                  | 6 (6)                                        | 5 (6)                                    |
| <i>CILP2</i>     | TC, TG, LDL      | rs10401969 | 5                                  | 0 (4)                                        | 0 (5)                                    |
| <i>APOB</i>      | TG, HDL          | rs1042034  | 10                                 | 9 (10)                                       | 4 (10)                                   |
| <i>JMJD1C</i>    | TG               | rs10761731 | 56                                 | 37 (56)                                      | 48 (53)                                  |
| <i>LPA</i>       | HDL              | rs1084651  | 3                                  | 0 (3)                                        | 0 (3)                                    |
| <i>BRAP</i>      | TC, LDL          | rs11065987 | 5                                  | 0 (5)                                        | 0 (5)                                    |
| <i>PLEC1</i>     | LDL, TC          | rs11136341 | 0                                  | 0 (0)                                        | 0 (0)                                    |
| <i>ST3GAL4</i>   | LDL, TC          | rs11220462 | 8                                  | 8 (8)                                        | 1 (7)                                    |
| <i>LRP1</i>      | TG, HDL          | rs11613352 | 9                                  | 0 (9)                                        | 0 (9)                                    |
| <i>CTF1</i>      | TG               | rs11649653 | 0                                  | 0 (0)                                        | 0 (0)                                    |
| <i>HNF1A</i>     | TC, LDL          | rs1169288  | 5                                  | 0 (5)                                        | 0 (5)                                    |
| <i>PINX1</i>     | TG               | rs11776767 | 17                                 | 16 (17)                                      | 15 (17)                                  |
| <i>STARD3</i>    | HDL              | rs11869286 | 3                                  | 3 (3)                                        | 3 (3)                                    |
| <i>LDLRAP1</i>   | TC, LDL          | rs12027135 | 10                                 | 9 (9)                                        | 0 (9)                                    |
| <i>COBLL1</i>    | HDL              | rs12328675 | 2                                  | 0 (2)                                        | 2 (2)                                    |
| <i>GCKR</i>      | TG, TC           | rs1260326  | 4                                  | 4 (4)                                        | 0 (4)                                    |
| <i>DNAH11</i>    | TC, LDL          | rs12670798 | 9                                  | 4 (9)                                        | 3 (9)                                    |
| <i>LPL</i>       | TG, HDL          | rs12678919 | 34                                 | 18 (34)                                      | 0 (32)                                   |
| <i>HMGCR</i>     | TC, LDL          | rs12916    | 17                                 | 15 (16)                                      | 2 (16)                                   |
| <i>MC4R</i>      | HDL              | rs12967135 | 14                                 | 10 (14)                                      | 3 (14)                                   |
| <i>SLC39A8</i>   | HDL              | rs13107325 | 1                                  | 0 (1)                                        | 0 (1)                                    |
| <i>TYW1B</i>     | TG               | rs13238203 | 0                                  | 0 (0)                                        | 0 (0)                                    |
| <i>APOB</i>      | LDL, TC          | rs1367117  | 6                                  | 0 (6)                                        | 0 (6)                                    |
| <i>NAT2</i>      | TG, TC           | rs1495741  | 5                                  | 4 (5)                                        | 4 (5)                                    |
| <i>LIPC</i>      | HDL, TC, TG      | rs1532085  | 1                                  | 1 (1)                                        | 0 (1)                                    |
| <i>LPA</i>       | LDL, TC          | rs1564348  | 2                                  | 0 (2)                                        | 0 (2)                                    |
| <i>ZNF648</i>    | HDL              | rs1689800  | 11                                 | 11 (11)                                      | 2 (10)                                   |
| <i>LCAT</i>      | HDL              | rs16942887 | 8                                  | 5 (8)                                        | 6 (8)                                    |
| <i>MLXIPL</i>    | TG, HDL          | rs17145738 | 9                                  | 8 (9)                                        | 1 (9)                                    |
| <i>FADS1-2-3</i> | TG, HDL, TC, LDL | rs174546   | 22                                 | 21 (21)                                      | 10 (22)                                  |
| <i>HFE</i>       | LDL, TC          | rs1800562  | 1                                  | 0 (1)                                        | 0 (1)                                    |
| <i>HNF4A</i>     | HDL, TC          | rs1800961  | 0                                  | 0 (0)                                        | 0 (0)                                    |
| <i>UBE2L3</i>    | HDL              | rs181362   | 36                                 | 23 (35)                                      | 4 (35)                                   |
| <i>ABCA1</i>     | HDL, TC          | rs1883025  | 1                                  | 1 (1)                                        | 0 (1)                                    |
| <i>HPR</i>       | TC, LDL          | rs2000999  | 0                                  | 0 (0)                                        | 0 (0)                                    |
| <i>CYP26A1</i>   | TG               | rs2068888  | 1                                  | 1 (1)                                        | 1 (1)                                    |
| <i>NPC1L1</i>    | TC, LDL          | rs2072183  | 0                                  | 0 (0)                                        | 0 (0)                                    |
| <i>CYP7A1</i>    | TC, LDL          | rs2081687  | 20                                 | 7 (18)                                       | 2 (17)                                   |
| <i>ANGPTL3</i>   | TG, TC, LDL      | rs2131925  | 103                                | 66 (102)                                     | 61 (101)                                 |
| <i>HLA</i>       | TG               | rs2247056  | 20                                 | 18 (20)                                      | 1 (19)                                   |
| <i>GPAM</i>      | TC, LDL          | rs2255141  | 18                                 | 15 (16)                                      | 0 (18)                                   |
| <i>ERGIC3</i>    | TC               | rs2277862  | 8                                  | 5 (8)                                        | 3 (8)                                    |
| <i>RAF1</i>      | TC               | rs2290159  | 16                                 | 14 (14)                                      | 6 (15)                                   |
| <i>TRPS1</i>     | HDL              | rs2293889  | 105                                | 104 (105)                                    | 55 (105)                                 |
| <i>CAPN3</i>     | TG               | rs2412710  | 0                                  | 0 (0)                                        | 0 (0)                                    |
| <i>PCSK9</i>     | LDL, TC          | rs2479409  | 0                                  | 0 (0)                                        | 0 (0)                                    |
| <i>MOSCI</i>     | TC, LDL          | rs2642442  | 4                                  | 3 (4)                                        | 0 (4)                                    |
| <i>LACTB</i>     | HDL              | rs2652834  | 2                                  | 0 (2)                                        | 0 (1)                                    |
| <i>TRPS1</i>     | TC               | rs2737229  | 13                                 | 0 (13)                                       | 3 (13)                                   |
| <i>C6orf106</i>  | HDL              | rs2814944  | 23                                 | 17 (23)                                      | 0 (23)                                   |

|                 |                  |           |    |         |         |
|-----------------|------------------|-----------|----|---------|---------|
| <i>C6orf106</i> | TC               | rs2814982 | 0  | 0 (0)   | 0 (0)   |
| <i>MAFB</i>     | TC, LDL          | rs2902940 | 4  | 3 (4)   | 1 (4)   |
| <i>AMPD3</i>    | HDL              | rs2923084 | 1  | 0 (1)   | 0 (1)   |
| <i>CMIP</i>     | HDL              | rs2925979 | 1  | 0 (1)   | 0 (1)   |
| <i>FRMD5</i>    | TG               | rs2929282 | 15 | 2 (15)  | 1 (14)  |
| <i>TRIB1</i>    | TG, TC, LDL, HDL | rs2954029 | 16 | 10 (16) | 0 (16)  |
| <i>IRS1</i>     | HDL, TG          | rs2972146 | 40 | 13 (40) | 0 (39)  |
| <i>LRP4</i>     | HDL              | rs3136441 | 21 | 18 (19) | 0 (20)  |
| <i>HLA</i>      | TC, LDL          | rs3177928 | 4  | 3 (4)   | 3 (4)   |
| <i>MYLIP</i>    | LDL, TC          | rs3757354 | 3  | 3 (3)   | 2 (3)   |
| <i>CETP</i>     | HDL, TC, LDL, TG | rs3764261 | 4  | 3 (3)   | 0 (2)   |
| <i>LILRA3</i>   | HDL              | rs386000  | 6  | 1 (4)   | 2 (6)   |
| <i>PGSI</i>     | HDL              | rs4129767 | 8  | 7 (8)   | 4 (6)   |
| <i>ABCA8</i>    | HDL              | rs4148008 | 3  | 3 (3)   | 1 (3)   |
| <i>ABCG5/8</i>  | LDL, TC          | rs4299376 | 2  | 0 (2)   | 0 (2)   |
| <i>APOE</i>     | TG               | rs439401  | 0  | 0 (0)   | 0 (0)   |
| <i>APOE</i>     | LDL, TC, HDL     | rs4420638 | 0  | 0 (0)   | 0 (0)   |
| <i>KLHL8</i>    | TG               | rs442177  | 26 | 25 (25) | 6 (23)  |
| <i>PABPC4</i>   | HDL              | rs4660293 | 5  | 4 (5)   | 0 (5)   |
| <i>KLF14</i>    | HDL              | rs4731702 | 12 | 8 (10)  | 9 (12)  |
| <i>SBNO1</i>    | HDL              | rs4759375 | 0  | 0 (0)   | 0 (0)   |
| <i>ZNF664</i>   | HDL, TG          | rs4765127 | 51 | 31 (48) | 26 (47) |
| <i>GALNT2</i>   | HDL, TG          | rs4846914 | 10 | 4 (10)  | 7 (10)  |
| <i>FLJ36070</i> | TC               | rs492602  | 10 | 10 (10) | 6 (9)   |
| <i>IRF2BP2</i>  | TC, LDL          | rs514230  | 10 | 9 (10)  | 0 (10)  |
| <i>PLA2G6</i>   | TG               | rs5756931 | 9  | 1 (9)   | 0 (9)   |
| <i>TTC39B</i>   | HDL, TC          | rs581080  | 0  | 0 (0)   | 0 (0)   |
| <i>TOP1</i>     | LDL, TC          | rs6029526 | 33 | 33 (33) | 4 (33)  |
| <i>CITED2</i>   | HDL              | rs605066  | 9  | 6 (9)   | 1 (9)   |
| <i>PLTP</i>     | HDL, TG          | rs6065906 | 5  | 3 (5)   | 0 (5)   |
| <i>SORT1</i>    | LDL, TC          | rs629301  | 7  | 1 (7)   | 2 (7)   |
| <i>ABO</i>      | LDL, TC          | rs9411489 | 4  | 4 (4)   | 0 (4)   |
| <i>ARL15</i>    | HDL              | rs6450176 | 20 | 20 (20) | 18 (20) |
| <i>MSL2L1</i>   | TG               | rs645040  | 22 | 15 (22) | 1 (22)  |
| <i>LDLR</i>     | LDL, TC          | rs6511720 | 0  | 0 (0)   | 0 (0)   |
| <i>TIMD4</i>    | TC, LDL, TG      | rs6882076 | 6  | 1 (6)   | 1 (6)   |
| <i>PDE3A</i>    | HDL              | rs7134375 | 1  | 1 (1)   | 0 (1)   |
| <i>MVK</i>      | HDL              | rs7134594 | 33 | 23 (29) | 26 (31) |
| <i>OSBPL7</i>   | LDL, TC          | rs7206971 | 39 | 12 (36) | 4 (35)  |
| <i>LIPG</i>     | HDL, TC          | rs7241918 | 10 | 4 (10)  | 0 (9)   |
| <i>ANGPTL4</i>  | HDL              | rs7255436 | 3  | 2 (2)   | 1 (3)   |
| <i>LOC55908</i> | HDL              | rs737337  | 1  | 1 (1)   | 0 (1)   |
| <i>EVI5</i>     | TC               | rs7515577 | 57 | 36 (57) | 30 (56) |
| <i>RAB3GAP1</i> | TC               | rs7570971 | 3  | 0 (3)   | 0 (3)   |
| <i>UBASH3B</i>  | TC, HDL          | rs7941030 | 16 | 11 (16) | 0 (14)  |
| <i>NYNRIN</i>   | LDL              | rs8017377 | 1  | 1 (1)   | 1 (1)   |
| <i>SCARB1</i>   | HDL              | rs838880  | 5  | 0 (5)   | 0 (5)   |
| <i>FRK</i>      | TC, LDL          | rs9488822 | 3  | 1 (3)   | 0 (3)   |
| <i>APOA1</i>    | TG, TC, HDL, LDL | rs964184  | 0  | 0 (0)   | 0 (0)   |
| <i>MAP3K1</i>   | TG               | rs9686661 | 6  | 4 (6)   | 4 (6)   |
| <i>PPP1R3B</i>  | HDL, TC, LDL     | rs9987289 | 6  | 6 (6)   | 3 (6)   |

\* SNP counts and linkage disequilibrium based on HapMap Phase II data. Numbers in parentheses indicate the number of CEU SNPs that were genotyped in JPT+CHB or in YRI in HapMap Phase II and for which LD could be estimated.



|                   |            |    |             |     |              |      |   |   |      |
|-------------------|------------|----|-------------|-----|--------------|------|---|---|------|
| <i>LRP4</i>       | rs3136441  | 11 | 46,699,823  | HDL |              | T, C | + | – | 0.39 |
| <i>NYNRIN</i>     | rs8017377  | 14 | 23,953,727  | LDL |              | G, A | + | – | 0.41 |
| <i>LDLRAP1</i>    | rs12027135 | 1  | 25,648,320  | TC  | LDL          | T, A | – | – | 0.41 |
| <i>MYLIP</i>      | rs3757354  | 6  | 16,235,386  | LDL | TC           | C, T | – | – | 0.45 |
| <i>LIPC</i>       | rs1532085  | 15 | 56,470,658  | HDL | TC, TG       | G, A | + | + | 0.46 |
| <i>PPP1R3B</i>    | rs9987289  | 8  | 9,220,768   | HDL | TC, LDL      | G, A | – | – | 0.46 |
| <i>CTF1</i>       | rs11649653 | 16 | 30,825,988  | TG  |              | C, G | – | – | 0.49 |
| <i>AMPD3</i>      | rs2923084  | 11 | 10,345,358  | HDL |              | A, G | – | – | 0.51 |
| <i>LACTB</i>      | rs2652834  | 15 | 61,183,920  | HDL |              | G, A | – | + | 0.53 |
| <i>FADS1–2–3</i>  | rs174546   | 11 | 61,326,406  | TG  | HDL, TC, LDL | C, T | + | – | 0.54 |
| <i>GPAM</i>       | rs2255141  | 10 | 113,923,876 | TC  | LDL          | G, A | + | – | 0.55 |
| <i>PABPC4</i>     | rs4660293  | 1  | 39,800,767  | HDL |              | A, G | – | + | 0.56 |
| <i>DNAH11</i>     | rs12670798 | 7  | 21,573,877  | LDL | TC           | T, C | + | – | 0.58 |
| <i>HLA</i>        | rs3177928  | 6  | 32,520,413  | TC  | LDL          | G, A | + | + | 0.58 |
| <i>TIMD4</i>      | rs6882076  | 5  | 156,322,875 | TC  | LDL, TG      | C, T | – | – | 0.58 |
| <i>PDE3A</i>      | rs7134375  | 12 | 20,365,025  | HDL |              | C, A | + | – | 0.58 |
| <i>APOE–C1–C2</i> | rs439401   | 19 | 50,106,291  | TG  |              | C, T | – | – | 0.59 |
| <i>SBNO1</i>      | rs4759375  | 12 | 122,362,191 | HDL |              | C, T | + | – | 0.60 |
| <i>NPC1L1</i>     | rs2072183  | 7  | 44,545,705  | TC  | LDL          | G, C | + | + | 0.61 |
| <i>LOC55908</i>   | rs737337   | 19 | 11,208,493  | HDL |              | T, C | – | + | 0.65 |
| <i>TRPS1</i>      | rs2293889  | 8  | 116,668,374 | HDL |              | G, T | – | – | 0.66 |
| <i>SLC39A8</i>    | rs13107325 | 4  | 103,407,732 | HDL |              | C, T | – | – | 0.66 |
| <i>FLJ36070</i>   | rs492602   | 19 | 53,898,229  | TC  |              | A, G | + | – | 0.73 |
| <i>LILRA3</i>     | rs386000   | 19 | 59,484,573  | HDL |              | G, C | + | + | 0.74 |
| <i>COBLL1</i>     | rs10195252 | 2  | 165,221,337 | TG  |              | T, C | – | – | 0.75 |
| <i>IRF2BP2</i>    | rs514230   | 1  | 232,925,220 | TC  | LDL          | T, A | – | + | 0.78 |
| <i>HNF4A</i>      | rs1800961  | 20 | 42,475,778  | HDL | TC           | C, T | – | + | 0.81 |
| <i>MVK</i>        | rs7134594  | 12 | 108,484,576 | HDL |              | T, C | – | + | 0.82 |
| <i>STARD3</i>     | rs11869286 | 17 | 35,067,382  | HDL |              | C, G | – | + | 0.82 |
| <i>PGS1</i>       | rs4129767  | 17 | 73,915,579  | HDL |              | A, G | – | – | 0.83 |
| <i>SCARB1</i>     | rs838880   | 12 | 123,827,546 | HDL |              | T, C | + | + | 0.87 |
| <i>UBE2L3</i>     | rs181362   | 22 | 20,262,068  | HDL |              | C, T | – | – | 0.88 |
| <i>LRP1</i>       | rs11613352 | 12 | 56,078,847  | TG  | HDL          | C, T | – | + | 0.91 |
| <i>OSBPL7</i>     | rs7206971  | 17 | 42,780,114  | LDL | TC           | G, A | + | – | 0.96 |
| <i>LIPG</i>       | rs7241918  | 18 | 45,414,951  | HDL | TC           | T, G | – | + | 0.97 |
| <i>RAFI</i>       | rs2290159  | 3  | 12,603,920  | TC  |              | G, C | – | – | 1.0  |

\* Except for the *ABO* locus, for which the lead SNP was unavailable in the CAD cohorts.

† Positions are relative to Human Genome NCBI Build 36.

‡ Alleles are designated with respect to the “+” strand.

§ The lipid effect and CAD effect are both modeled on the minor allele.

|| Shaded are loci having concordance between the direction of lipid effect and the change in CAD risk (increased TC = increased CAD risk; increased LDL-C = increased CAD risk; decreased HDL = increased CAD risk; increased TG = increased CAD risk). SNPs meeting the pre-specified statistical significance threshold of  $P < 0.001$  for CAD are above the demarcated horizontal line.

**Supplementary Table 16.** Associations of genotype scores with hyperlipidemia status.

|       | Genotype score quartile | # of cases | # of controls | Odds ratio estimates* |      |       | Pr > Z              |
|-------|-------------------------|------------|---------------|-----------------------|------|-------|---------------------|
|       |                         |            |               | Point estimate        | 2.5% | 97.5% |                     |
| LDL-C | Q1                      | 50         | 216           | -                     | -    | -     | -                   |
|       | Q2                      | 111        | 155           | 3.5                   | 2.6  | 4.7   | $5 \times 10^{-5}$  |
|       | Q3                      | 162        | 104           | 7.9                   | 5.9  | 10.8  | $1 \times 10^{-11}$ |
|       | Q4                      | 209        | 57            | 12.6                  | 9.1  | 17.5  | $1 \times 10^{-14}$ |
|       | Total                   | 532        | 532           |                       |      |       |                     |
| HDL-C | Q1                      | 98         | 263           | -                     | -    | -     | -                   |
|       | Q2                      | 156        | 203           | 2.0                   | 1.5  | 2.8   | $1 \times 10^{-5}$  |
|       | Q3                      | 180        | 177           | 2.7                   | 2.3  | 3.2   | $6 \times 10^{-10}$ |
|       | Q4                      | 219        | 141           | 4.2                   | 3.6  | 5.0   | $2 \times 10^{-16}$ |
|       | Total                   | 653        | 784           |                       |      |       |                     |
| TG    | Q1                      | 36         | 84            | -                     | -    | -     | -                   |
|       | Q2                      | 85         | 35            | 5.7                   | 3.3  | 9.9   | $2 \times 10^{-10}$ |
|       | Q3                      | 102        | 18            | 13.2                  | 7.0  | 25.0  | $1 \times 10^{-18}$ |
|       | Q4                      | 114        | 6             | 44.3                  | 17.8 | 110.0 | $4 \times 10^{-28}$ |
|       | Total                   | 337        | 143           |                       |      |       |                     |

\* For each trait, odds ratios are relative to the reference group (Q1). Note that the genetic risk score itself is created from the sum of the allele counts weighted by effect size, adjusted for the number of SNPs genotyped, age, and sex. These genetic risk scores were ranked in ascending order and divided into quantiles, with the maximum possible genetic risk score set at one. For LDL-C, the ranges of scores for the quartiles were: Q1 = 0.43-0.66, Q2 = 0.66-0.72, Q3 = 0.72-0.78, Q4 = 0.78-1.00. For HDL-C, the ranges of scores for the quartiles were: Q1 = 0.56-0.73, Q2 = 0.73-0.77, Q3 = 0.77-0.83, Q4 = 0.83-1.00. For TG, the ranges of scores for the quartiles were: Q1 = 0.28-0.72, Q2 = 0.72-0.78, Q3 = 0.78-0.84, Q4 = 0.84-1.00.

**Supplementary Table 17.** Hyperlipidemia cohort characteristics.

|                  | Low LDL-C  | High LDL-C | Low HDL-C  | High HDL-C | Low TG     | High TG       |
|------------------|------------|------------|------------|------------|------------|---------------|
| # of individuals | 532        | 532        | 784        | 652        | 144        | 344           |
| Sex (% female)   | 49.8%      | 52.8%      | 47.1%      | 47.6%      | 52.1%      | 33.7%         |
| Age mean (SD)    | 65.7 (9)   | 42.2 (17)  | 61.8 (13)  | 58.4 (12)  | 45.3 (20)  | 50.2 (13)     |
| HDL-C, mean (SD) | 54.4 (16)  | n.a.       | 36.2 (7)   | 89.8 (20)  | 50.2 (16)  | 34.7 (12)     |
| LDL-C, mean (SD) | 110 (17)   | 219 (47)   | 104.7 (36) | 122.2 (36) | 166.0 (73) | n.c.          |
| TG, mean (SD)    | 123 (64)   | n.a.       | n.a.       | n.a.       | 106.2 (44) | 1070.9 (1460) |
| TC, mean (SD)    | 188.8 (21) | 308 (57)   | 169.0 (40) | 228.8 (42) | 239.3 (89) | 324.2 (154)   |

n.a. = not available; n.c. = not calculated (Friedewald equation not valid for TG levels above 400 mg/dL).

**Supplementary Table 18.** Monogenic lipid disorders.

| Gene           | Locus  | Lead SNP*  | Associated traits               | Lipid disorder                                                        |
|----------------|--------|------------|---------------------------------|-----------------------------------------------------------------------|
| <i>ABCA1</i>   | 9q31.1 | rs1883025  | Low HDL-C                       | Tangier disease                                                       |
| <i>ABCG5</i>   | 2p21   | rs4299376  | High LDL-C                      | Sitosterolemia                                                        |
| <i>ABCG8</i>   | 2p21   | rs4299376  | High LDL-C                      | Sitosterolemia                                                        |
| <i>APOA1</i>   | 11q23  | rs964184   | Low HDL-C                       | ApoA-I deficiency                                                     |
| <i>APOA5</i>   | 11q23  | rs964184   | High VLDL,<br>high chylomicrons | ApoA-V deficiency                                                     |
| <i>APOB</i>    | 2p24   | rs1367117  | Low LDL-C<br>High LDL-C         | Familial hypobetalipoproteinemia<br>Familial defective ApoB-100       |
| <i>APOC2</i>   | 19q13  | rs4420638  | High chylomicrons               | Familial ApoC-II deficiency                                           |
| <i>APOE</i>    | 19q13  | rs4420638  | High VLDL,<br>high chylomicrons | Familial dysbetalipoproteinemia                                       |
| <i>CETP</i>    | 16q13  | rs3764261  | High HDL-C                      | Cholesteryl ester transfer protein deficiency                         |
| <i>LCAT</i>    | 16q22  | rs16942887 | Low HDL-C                       | Lecithin-cholesterol acyltransferase deficiency<br>(fish-eye disease) |
| <i>LDLR</i>    | 19p13  | rs6511720  | High LDL-C                      | Familial hypercholesterolemia                                         |
| <i>LDLRAP1</i> | 1p36   | rs12027135 | High LDL-C                      | Autosomal recessive hypercholesterolemia                              |
| <i>LIPC</i>    | 15q22  | rs1532085  | High VLDL remnants              | Familial hepatic lipase deficiency                                    |
| <i>LMF1</i>    | 16p13  | —          | High triglycerides              | Combined lipase deficiency                                            |
| <i>LPL</i>     | 8p21   | rs12678919 | High chylomicrons               | Lipoprotein lipase deficiency                                         |
| <i>MTTP</i>    | 4q24   | —          | Low LDL-C                       | Abetalipoproteinemia                                                  |
| <i>PCSK9</i>   | 1p32   | rs2479409  | Low LDL-C<br>High LDL-C         | PCSK9 deficiency<br>Autosomal-dominant hypercholesterolemia           |
| <i>SAR1B</i>   | 5q31.1 | —          | Low chylomicrons                | Chylomicron retention disease                                         |

\*Where available, the lead SNP (from the primary meta-analysis) in the vicinity of the causal gene is listed.









|                   |           |           |     |        |                        |        |                       |        |                       |                        |       |
|-------------------|-----------|-----------|-----|--------|------------------------|--------|-----------------------|--------|-----------------------|------------------------|-------|
| <i>APOE-C1-C2</i> | rs4420638 | rs4420638 | LDL | 98,409 | $8.7 \times 10^{-147}$ | 39,596 | $1.1 \times 10^{-74}$ | 50,637 | $5.7 \times 10^{-80}$ | $1.1 \times 10^{-152}$ | 0.86  |
| <i>APOE-C1-C2</i> | rs4420638 | rs4420638 | TC  | 93,999 | $5.2 \times 10^{-111}$ | 39,914 | $1.1 \times 10^{-47}$ | 46,632 | $7.8 \times 10^{-71}$ | $2.7 \times 10^{-116}$ | 0.20  |
| <i>APOE-C1-C2</i> | rs439401  | rs439401  | TG  | 98,656 | $1.1 \times 10^{-30}$  | 32,065 | $1.8 \times 10^{-21}$ | 50,880 | $5.9 \times 10^{-13}$ | $4.0 \times 10^{-32}$  | 0.073 |
| <i>FLJ36070</i>   | rs492602  | rs492602  | TC  | 98,409 | $2.0 \times 10^{-10}$  | 47,776 | $3.0 \times 10^{-4}$  | 50,637 | $2.4 \times 10^{-8}$  | $7.4 \times 10^{-11}$  | 0.18  |
| <i>LILRA3</i>     | rs386000  | rs386000  | HDL | 98,409 | $4.3 \times 10^{-16}$  | 47,772 | $1.5 \times 10^{-6}$  | 50,637 | $5.0 \times 10^{-13}$ | $4.1 \times 10^{-17}$  | 0.031 |
| <i>ERGIC3</i>     | rs2277862 | rs2277862 | TC  | 93,999 | $3.8 \times 10^{-10}$  | 47,776 | $1.5 \times 10^{-3}$  | 46,632 | $5.1 \times 10^{-9}$  | $1.4 \times 10^{-10}$  | 0.074 |
| <i>MAFB</i>       | rs2902940 | rs2902941 | LDL | 90,614 | $1.1 \times 10^{-8}$   | 47,367 | $5.7 \times 10^{-5}$  | 50,677 | $2.5 \times 10^{-5}$  | $5.6 \times 10^{-9}$   | 0.87  |
| <i>MAFB</i>       | rs2902940 | rs2902940 | TC  | 98,409 | $6.1 \times 10^{-11}$  | 47,776 | $1.9 \times 10^{-6}$  | 50,637 | $2.4 \times 10^{-6}$  | $2.1 \times 10^{-11}$  | 0.89  |
| <i>TOP1</i>       | rs6029526 | rs909802  | LDL | 98,409 | $3.2 \times 10^{-19}$  | 47,367 | $3.4 \times 10^{-14}$ | 50,637 | $9.2 \times 10^{-8}$  | $6.0 \times 10^{-20}$  | 0.12  |
| <i>TOP1</i>       | rs6029526 | rs4297946 | TC  | 98,409 | $2.8 \times 10^{-17}$  | 47,774 | $7.1 \times 10^{-14}$ | 50,637 | $1.6 \times 10^{-6}$  | $4.8 \times 10^{-18}$  | 0.042 |
| <i>HNF4A</i>      | rs1800961 | rs1800961 | HDL | 98,656 | $1.1 \times 10^{-15}$  | 34,496 | $1.2 \times 10^{-6}$  | 50,880 | $8.2 \times 10^{-12}$ | $1.1 \times 10^{-16}$  | 0.22  |
| <i>HNF4A</i>      | rs1800961 | rs1800961 | TC  | 98,409 | $5.7 \times 10^{-13}$  | 34,498 | $2.6 \times 10^{-8}$  | 50,637 | $1.1 \times 10^{-6}$  | $1.6 \times 10^{-13}$  | 0.57  |
| <i>PLTP</i>       | rs6065906 | rs6065906 | HDL | 98,409 | $1.9 \times 10^{-22}$  | 47,772 | $5.4 \times 10^{-14}$ | 50,637 | $1.6 \times 10^{-11}$ | $7.4 \times 10^{-24}$  | 0.48  |
| <i>PLTP</i>       | rs6065906 | rs4810479 | TG  | 93,131 | $4.7 \times 10^{-18}$  | 47,782 | $7.7 \times 10^{-10}$ | 46,632 | $1.5 \times 10^{-10}$ | $6.7 \times 10^{-19}$  | 0.84  |
| <i>UBE2L3</i>     | rs181362  | rs181362  | HDL | 97,764 | $1.1 \times 10^{-8}$   | 47,772 | $4.0 \times 10^{-4}$  | 50,880 | $1.5 \times 10^{-6}$  | $3.5 \times 10^{-9}$   | 0.39  |
| <i>PLA2G6</i>     | rs5756931 | rs5756931 | TG  | 98,409 | $3.8 \times 10^{-8}$   | 47,782 | $1.3 \times 10^{-4}$  | 50,637 | $3.4 \times 10^{-5}$  | $1.7 \times 10^{-8}$   | 0.81  |

\* Sample sizes and *P*-values for “All Studies” correspond to the primary meta-analysis and are identical to those shown in Supplementary Table 2.

† Meta-analysis of studies that used Principal Component Analysis (PCA) to account for population structure, as per Supplementary Table 3.

‡ Meta-analysis of studies that did not use PCA to account for population structure, as per Supplementary Table 3.

§ Meta-analysis of “Studies with PCA” and “Studies without PCA” *P*-values. Pearson’s correlation between “All Studies” *P*-values and “Combined” *P*-values = 0.98.

|| Heterogeneity *P*-values comparing *Z*-statistics for “Studies with PCA” and “Studies without PCA” calculated using METAL.

## Acknowledgements

**Massachusetts General Hospital (MGH).** S.K. is funded by RC1 HL099793, RC1 HL099634, and RC2 HL101864, all from the National Heart, Lung, and Blood Institute (NHLBI) of the US National Institutes of Health (NIH), and the Donovan Family Foundation. D.A. is funded by NIH R01 HL087676 from the NHLBI STAMPEED Genomics Research Program. Replication genotyping was supported by The Broad Institute Center for Genotyping and Analysis through grant U54 RR020278 from the National Center for Research Resources. K.M. is funded by T32 HL007208 and K99 HL098364 from the NHLBI. J.P.P. is a research fellow supported by Sarnoff Cardiovascular Research Foundation. We thank Drs. Dennis A. Ausiello and Kenneth R. Chien for support through the MGH Department of Medicine and Cardiovascular Research Center.

**University of Michigan.** T.M.T. is funded by T32 HG00040 from the National Human Genome Research Institute (NHGRI) of the NIH. M.B. is funded by U01 DK062370 from the National Institute of Diabetes and Digestive and Kidney Diseases (NIDDK) of the NIH.

**Cardiovascular Health Study.** The CHS research reported in this article was supported by contract numbers N01-HC-85079 through N01-HC-85086, N01-HC-35129, N01 HC-15103, N01 HC-55222, N01-HC-75150, N01-HC-45133, grant numbers U01 HL080295 and R01 HL087652 from the NHLBI, with additional contribution from the National Institute of Neurological Disorders and Stroke (NINDS) of the NIH. A full list of principal CHS investigators and institutions can be found at <http://www.chs-nhlbi.org/pi.htm>. DNA handling and genotyping was supported in part by National Center for Research Resources grant M01-RR00425 to the Cedars-Sinai General Clinical Research Center Genotyping core and NIDDK grant DK063491 to the Southern California Diabetes Endocrinology Research Center.

**Women's Genome Health Study.** The Women's Genome Health Study Investigators are indebted to the staff of the Women's Health Study and to the nearly 20,000 dedicated and conscientious women who are participating in this study. The WGHS is supported by funds from

the NHLBI (grants HL 04381 and HL 080467), the National Cancer Institute (CA 047988), the Leducq Foundation, and the Donald W. Reynolds Foundation. Genotyping within the WGHS was supported by Amgen, Inc.

**PARC.** PARC was supported by NIH grant U01 HL069757.

**Family Heart Study.** The Family Heart Study (FHS) work was supported in part by NIH grants 5R01HL08770003, 5R01HL08821502 (M.A.P.) from the NHLBI and 5R01DK07568102, 5R01DK06833603 from the NIDDK (I.B.B.). The authors thank the staff and participants of the FHS for their important contributions.

**National FINRISK Study.** V.S. was supported by the Sigrid Juselius Foundation, Finnish Foundation for Cardiovascular research, and the Finnish Academy (grant number 129494).

**BLSA.** This study was supported in part by the Intramural Research Program of the NIH, National Institute on Aging (NIA). A portion of that support was through an R&D contract with MedStar Research Institute.

**InCHIANTI.** The InCHIANTI study baseline (1998-2000) was supported as a "targeted project" (ICS110.1/RF97.71) by the Italian Ministry of Health and in part by the NIA (Contracts: 263 MD 9164 and 263 MD 821336).

**CLHNS.** The investigators thank the Office of Population Studies Foundation research and data collection teams. This work was supported by NIH grants DK078150, TW05596, HL085144, RR20649, ES10126, DK56350, and T32 GM007092.

**Age, Gene/Environment Susceptibility (AGES) – Reykjavik Study.** The Age, Gene/Environment Susceptibility – Reykjavik Study has been funded by NIH contract N01-AG-12100, the NIA Intramural Research Program, Hjartavernd (the Icelandic Heart Association), and the Althingi (the Icelandic Parliament).

**ARIC.** The Atherosclerosis Risk in Communities Study is carried out as a collaborative study supported by NHLBI contracts N01-HC-55015, N01-HC-55016, N01-HC-55018, N01-HC-55019, N01-HC-55020, N01-HC-55021, N01-HC-55022, R01HL087641, R01HL59367, R01HL086694 and RC2 HL102419; NHGRI contract U01HG004402; and NIH contract HHSN268200625226C. The authors thank the staff and participants of the ARIC study for their important contributions. Infrastructure was partly supported by Grant Number UL1RR025005, a component of the NIH Roadmap for Medical Research.

**Framingham Heart Study.** The investigators thank the participants and staff in the Framingham Heart Study. This research was conducted in part using data and resources from the Framingham Heart Study of the NHLBI and Boston University School of Medicine. The analyses reflect intellectual input and resource development from the Framingham Heart Study investigators participating in the SNP Health Association Resource (SHARe) project. This work was partially supported by the NHLBI Framingham Heart Study (Contract No. N01-HC-25195) and its contract with Affymetrix, Inc for genotyping services (Contract No. N02-HL-6-4278). DNA isolation and biochemistry were partly supported by NHLBI HL-54776. A portion of this research utilized the Linux Cluster for Genetic Analysis (LinGA-II) funded by the Robert Dawson Evans Endowment of the Department of Medicine at Boston University School of Medicine and Boston Medical Center.

**BRIGHT Study.** The contribution of M.J.C., T.J., and P.B.M. was facilitated by the Barts and The London National Institute for Health Research Cardiovascular Biomedical Research Unit, the Medical Research Council Programme grant number G9521010, data from the Wellcome Trust Case Control Consortium and a Wellcome Trust Value In People Award. The BRIGHT study is supported by the Medical Research Council of Great Britain (G9521010D) and the British Heart Foundation (BHF) (PG/02/128). Genotyping was funded by the Wellcome Trust (grant number; 076113/B/04/Z) as part of The Wellcome Trust Case Control Consortium. The BRIGHT study is extremely grateful to all the patients who participated in the study and the

BRIGHT nursing team. BRIGHT investigators are also supported by BHF grants (RG/07/005/23633 and SP/08/005/25115) and EU Ingenious HyperCare Consortium: Integrated Genomics, Clinical Research and Care in Hypertension (LSHM-C7-2006-037093). This work forms part of the research themes contributing to the translational research portfolio of Barts and the London Cardiovascular Biomedical Research Unit that is supported and funded by the National Institute of Health Research. N.J.S. holds a Chair supported by the British Heart Foundation.

**GEMS Consortium.** We acknowledge the support of the UK Medical Research Council, Wellcome Trust, British Heart Foundation (BHF), European Commission, and GlaxoSmithKline. Specifically, we acknowledge use of genotype data from the 1958 British birth cohort DNA collection, funded by the Medical Research Council grant G0000934 and the Wellcome Trust grant 068545/Z/02. This research utilises resources provided by the Type 1 Diabetes Genetics Consortium, a collaborative clinical study sponsored by the National Institute of Diabetes and Digestive and Kidney Diseases (NIDDK), National Institute of Allergy and Infectious Diseases (NIAID), National Human Genome Research Institute (NHGRI), National Institute of Child Health and Human Development (NICHD), and Juvenile Diabetes Research Foundation International (JDRF) and supported by U01 DK062418. The T1DGC GWAS project was funded by the NIDDK and JDRF, and co-ordinated by the JDRF/WT Diabetes and Inflammation Laboratory, Cambridge Institute for Medical Research, Cambridge, UK, which is funded by the JDRF International, the Wellcome Trust, and the National Institute for Health Research Cambridge Biomedical Research Center. The Cambridge Institute for Medical Research is in receipt of a Wellcome Trust Strategic Award (079895). I.B. acknowledges support from EU FP6 funding (contract no LSHM-CT-2003-503041). M.S.S. and S.L.R. are funded by the BHF (PG/08/094) and MRC (G0801566). I.B. (077016/Z/05/Z), L.P., M.I., and P.D. are funded by the Wellcome Trust. The CoLaus study was supported by grants from GlaxoSmithKline, the Swiss

National Science Foundation (Grant 33CSCO-122661) and the Faculty of Biology and Medicine of Lausanne.

**FUSION.** The FUSION investigators thank the Finnish citizens who generously participated in these studies. Support for FUSION was provided by NIH grants DK062370 (M.B.), DK072193 (K.L.M.), T32 HG00040 (T.M.T.), and K99HL094535 (to C.J.W.), intramural project number 1Z01 HG000024 (to F.S.C.), and an American Diabetes Association (ADA) Mentor-Based Postdoctoral Fellowship grant (M.B.). K.L.M. is a Pew Scholar for the Biomedical Sciences. Genome-wide genotyping was conducted by the Johns Hopkins University Genetic Resources Core Facility SNP Center at the Center for Inherited Disease Research (CIDR), with support from CIDR NIH contract no. N01-HG-65403. The investigators also thank Anne Jackson for assistance with statistical analyses.

**Singapore Malay Eye Study and Singapore Prospective Study Program.** These studies were supported by the Agency for Science Technology and Research, Singapore.

**deCODE CAD/MI Study.** This study was sponsored by NIH grant R01 HL089650.

**ENGAGE Consortium.** The consortium has received funding from the European Community's Seventh Framework Programme (FP7/2007-2013)/grant agreement HEALTH-F4-2007-201413 by the European Commission under the programme “Quality of Life and Management of the Living Resources” of 5th Framework Programme (no. QLG2-CT-2002-01254). The Finnish Heart Association (M.P., L.P.) is gratefully acknowledged for its financial support. L.P. and J.K. have been supported by the Academy of Finland Centre of Excellence in Complex Disease Genetics. NFBC genotyping was supported on NHLBI grant 5R01HL087679-02 through the STAMPEED program. EUROSPAN (European Special Populations Research Network) was supported by European Commission FP6 STRP grant number 018947 (LSHG-CT-2006-01947). For the MICROS study in South Tyrol, we thank the primary care practitioners R. Stocker, S. Waldner, T. Pizzecco, J. Plangger, U. Marcadent and the personnel of the Hospital of Silandro (Department of Laboratory Medicine) for their participation and collaboration in the research project. In South Tyrol, the study was supported by the Ministry of Health of the Autonomous Province of Bolzano and the South Tyrolean Sparkasse Foundation. NTR/NESDA was supported by “Genetic basis of anxiety and depression” program (NWO 904-61-090); Twin-family

database for behavior genomics studies (NWO 480-04-004); Center for Medical Systems Biology (NWO Genomics); Spinozapremie (SPI 56-464-14192); Centre for Neurogenomics and Cognitive Research (CNCR-VU); Genome-wide analyses of European twin and population cohorts (EU/QLRT-2001-01254); Geestkracht program of ZonMW (10-000-1002); and matching funds from universities and mental health care institutes involved in NESDA (GGZ Buitenamstel-Geestgronden, Rivierduinen, University Medical Center Groningen, GGZ Lentis, GGZ Friesland, GGZ Drenthe). Major funding for this project is from the Genetic Association Information Network of the Foundation for the US National Institutes of Health, a public-private partnership between the NIH and Pfizer, Affymetrix and Abbott Laboratories. The Vis study in the Croatian island of Vis was supported through the grants from the Medical Research Council UK to H.C., A.W. and I.R.; and Ministry of Science, Education and Sport of the Republic of Croatia to I.R. (number 108-1080315-0302). The ERF study was supported by grants from The Netherlands Organisation for Scientific Research, Erasmus MC and the Centre for Medical Systems Biology (CMSB). We are grateful to all study participants and their relatives, general practitioners and neurologists for their contributions and to P. Veraart for her help in genealogy, J. Vergeer for the supervision of the laboratory work and P. Snijders for his help in data collection. The Northern Swedish Population Health Study was funded by the Swedish Medical Research Council and the European Commission through the EUROSPAN project. We are greatly indebted to the participants in the study. The ORCADES study was supported by the Scottish Executive Health Department, the Royal Society and the Wellcome Trust Clinical Research Facility. We would like to acknowledge the data collection team in Orkney, the clerical team in Edinburgh and the people of Orkney. We express our appreciation to all study participants.

**KORA.** The KORA research platform was initiated and financed by the Helmholtz Center Munich, German Research Center for Environmental Health, which is funded by the German Federal Ministry of Education and Research (BMBF) and by the State of Bavaria. Part of this work was financed by the German National Genome Research Network (NGFN-2 and NGFNPlus: 01GS0823) and by the “Genomics of Lipid-associated Disorders – GOLD” of the “Austrian Genome Research Programme GEN-AU.” The KORA research was supported within the Munich Center of Health Sciences (MC Health) as part of LMUinnovativ. We gratefully acknowledge the contribution of P. Lichtner, G. Eckstein and T. Strom and all other members of

the Helmholtz Zentrum München genotyping staff in generating and analyzing the SNP dataset. We thank all members of field staffs who were involved in the planning and conduct of the MONICA/KORA Augsburg studies. Finally, we express our appreciation to all study participants.

**Rotterdam Study.** The Rotterdam Study (I and II) is funded by Erasmus Medical Center and Erasmus University, Rotterdam, Netherlands Organization for the Health Research and Development (ZonMw), the Research Institute for Diseases in the Elderly (RIDE), the Ministry of Education, Culture and Science, the Ministry for Health, Welfare and Sports, the European Commission (DG XII), the Netherlands Genomics Initiative (NGI)-sponsored Netherlands Consortium for Healthy Aging (NCHA) and the Municipality of Rotterdam. Genome-wide genotyping of the Rotterdam Study was supported by The Netherlands Organization for Scientific Research (NOW 175.010.2005.011).

**Erasmus Rucphen Family Study.** Erasmus Rucphen Family (ERF) was supported by grants from The Netherlands Organization for Scientific Research (NWO; Pionier Grant), Erasmus MC, and the Netherlands Genomics Initiative (NGI)-sponsored Center of Medical Systems Biology (CMSB).
